1  
2  
3  
4  
5  
6  
7  
8  
9  
10  
11

**Local genetic context shapes the function of a gene regulatory network**

Anna Nagy-Staroń<sup>1</sup>, Kathrin Tomasek<sup>1</sup>, Caroline Caruso Carter<sup>1</sup>, Elisabeth Sonnleitner<sup>2</sup>, Bor  
Kavčič<sup>1</sup>, Tiago Paixão<sup>1,3</sup>, Călin C. Guet<sup>1</sup>

<sup>1</sup> Institute of Science and Technology Austria, Klosterneuburg, Austria

<sup>2</sup> Department of Microbiology, Immunobiology and Genetics, Max F. Perutz Laboratories,  
Center Of Molecular Biology, University of Vienna, Vienna, Austria

<sup>3</sup> Present address: Instituto Gulbenkian de Ciência, Oeiras, Portugal

Corresponding author: Călin C. Guet email: [calin@ist.ac.at](mailto:calin@ist.ac.at)

12 **Gene expression levels are influenced by multiple coexisting molecular mechanisms. Some of**  
13 **these interactions, such as those of transcription factors and promoters have been studied**  
14 **extensively. However, predicting phenotypes of gene regulatory networks remains a major**  
15 **challenge. Here, we use a well-defined synthetic gene regulatory network to study how**  
16 **network phenotypes depend on local genetic context, i.e. the genetic neighborhood of a**  
17 **transcription factor and its relative position. We show that one gene regulatory network with**  
18 **fixed topology can display not only quantitatively but also qualitatively different phenotypes,**  
19 **depending solely on the local genetic context of its components. Our results demonstrate**  
20 **that changes in local genetic context can place a single transcriptional unit within two**  
21 **separate regulons without the need for complex regulatory sequences. We propose that**  
22 **relative order of individual transcriptional units, with its potential for combinatorial**  
23 **complexity, plays an important role in shaping phenotypes of gene regulatory networks.**

## 24 **Introduction**

25 Changes in regulatory connections between individual transcriptional units (TUs) or, in other  
26 words, the rewiring of gene regulatory networks (GRNs), is a major genetic mechanism  
27 underlying phenotypic diversity (Shubin et al., 2009; Wagner and Lynch, 2010; Wray, 2007). A  
28 lot of effort has been put into understanding how mutations in transcription factors and their  
29 DNA binding sites within promoter regions influence GRN behavior, plasticity and evolution  
30 (Babu et al., 2004; Balaji et al., 2007; Chen et al., 2012; Iglar et al., 2018; Isalan et al., 2008;  
31 Nocedal et al., 2017). However, we are still unable to predict GRN phenotypes from first  
32 principles (Browning and Busby, 2016).

33

34 Genes and the genetic elements that regulate them, promoters, are arranged in a linear  
35 manner on chromosomes. Thus they are embedded into a larger genetic context, represented  
36 by the changing genetic background of the rest of the genomic sequence or by their specific  
37 physical location on the chromosome. The genetic context in which GRNs find themselves in,  
38 influences and modulates the way these respond to the environment and interact with other  
39 GRNs and it also shapes the interactions within the GRN itself (Cardinale and Arkin, 2012; Chan  
40 et al., 2005; Steinrueck and Guet, 2017; Wu and Rao, 2010). In bacteria, gene expression levels  
41 are thought to be determined by RNA polymerase recognizing promoter sequences and  
42 subsequently initiating transcription, which is the key step at which a large part of  
43 transcriptional regulation takes place (Browning and Busby, 2004). However, context effects  
44 resulting from occupying a particular location within the genome can significantly alter  
45 expression levels (Junier, 2014; Lagomarsino et al., 2015; Scholz et al., 2019). Distance to the

46 origin of replication influences transcription levels due to gene dosage effects, the presence of  
47 transcriptionally active and silent regions, as well as spatial and temporal variation in DNA  
48 superhelicity; while collisions between DNA replication and transcription influence gene  
49 expression levels differently on leading and lagging strands (Beckwith et al., 1966; Bryant et al.,  
50 2014; Mirkin et al., 2006; Sobetzko et al., 2012; Vora et al., 2009). At a local scale,  
51 transcriptional interference, transcription-coupled DNA supercoiling, presence of *cis*-antisense  
52 RNA, as well as transcriptional read-through, all link together the expression of neighboring TUs  
53 (Cambray et al., 2013; Georg and Hess, 2011; Liu and Wang, 1987; Reynolds et al., 1992;  
54 Shearwin et al., 2005; Wu and Fang, 2003). Within operons, number, length and order of genes  
55 can all affect gene expression (Jacob and Monod, 1961; Lim et al., 2011; Zipser, 1969). All of  
56 these factors, that can individually modulate gene expression, vary simultaneously across the  
57 genome, with potential for significant combinatorial effects (Meyer et al., 2018; Scholz et al.,  
58 2019).

59  
60 While these multiple local context-dependent mechanisms are known to modulate gene  
61 expression, the qualitative phenotype of a GRN is usually thought to be defined solely by the  
62 network topology, with the connections within GRN considered independent of the physical  
63 location of the network components (Babu et al., 2004; Mangan et al., 2003), and determined  
64 simply by the promoter sequences. One of the reasons for this assumption is the belief that *cis*-  
65 regulatory changes are less pleiotropic than changes to the protein itself (Prud'homme et al.,  
66 2006), although some have questioned this (Stern and Orgogozo, 2008). However, other non-  
67 coding genetic factors such as transcriptional read-through or supercoiling have the potential to

68 change gene expression with the same pleiotropic freedom as *cis*-regulatory changes. Here, we  
69 ask how the immediate local genetic context outside of individual TUs of a GRN can alter both,  
70 the qualitative and quantitative phenotype of a network, and how many phenotypes are  
71 accessible for this particular GRN, while the network topology *per se* remains unchanged. In  
72 order to keep the number of genetic interactions to a minimum, we chose to study a synthetic  
73 GRN. This tractable system allows for a simplified description of more complex naturally  
74 occurring GRNs, where a large number of inherently complex interactions make such a question  
75 very difficult to answer experimentally (Mukherji and van Oudenaarden, 2009; Wolf and Arkin,  
76 2003). Here, we shuffle individual TUs (understood here as the unit formed by: the mRNA  
77 coding sequence, the promoter driving its expression and the transcriptional terminator  
78 marking the end of the transcribed sequence) of a GRN. In doing so, we alter solely the *local*  
79 *genetic context*, while keeping the actual interactions (topology) within the GRN unchanged and  
80 thus the number of interactions to a tractable minimum. We then define the *phenotype of the*  
81 *GRN* as the levels of gene expression measured across four different environments, defined by  
82 the presence or absence of two different chemical inducers that alter the binding state of two  
83 different well characterized transcription factors. Qualitative phenotypes are here based on a  
84 set of binary output values for each input state, therefore defining different logical operators  
85 (e.g. NOR, ON, OFF) (for details see *Threshold for assigning a phenotype to individual GRNs*).  
86 Quantitative phenotypes are defined as a set of four expression values varying continuously  
87 within one particular behavior. In this way, we systematically explore the space of possible  
88 phenotypes of the GRN and thereby we can disentangle the effects of local genetic context  
89 from multiple other factors that can affect gene expression levels.

## 90 Results

91 Our GRN (Fig. 1A) is composed of the genes coding for three of the best characterized  
92 repressors: LacI, TetR and lambda CI (abbreviations used throughout the text: L, T and C,  
93 respectively), and the promoters they control,  $P_{lac}$ ,  $P_{tet}$  and  $P_R$ . The three repressor genes are  
94 transcriptionally interconnected into a GRN, with LacI repressing both *tetR* and its own  
95 expression, and TetR repressing expression of *ci*. The controlled promoters are synthetic  
96 variants of the  $P_L$  promoter of phage lambda with two *tet* or *lac* operator sites located in the  
97 direct vicinity of the -35 and -10 promoter elements (Lutz and Bujard, 1997). The binding state  
98 of TetR and LacI changes in the presence of inducers: anhydrotetracycline (aTc) and isopropyl  $\beta$ -  
99 D-thiogalactopyranoside (IPTG), respectively. A *yfp* gene, expressed from a CI-controlled  $P_R$   
100 promoter, serves as output. The *yfp* gene is located separately from the rest of the genetic  
101 circuit at a transcriptionally insulated locus on the chromosome (*attB* site of phage P21). In our  
102 synthetic system, each individual promoter and transcription factor gene it controls are  
103 separated from the neighboring one by a strong transcriptional terminator T1 of the *rrnB* gene  
104 (Orosz et al., 1991), forming an individual TU (Fig. 1B). We chose T1 as one of the strongest  
105 transcriptional terminators in *E. coli* to transcriptionally insulate individual TUs from one  
106 another (Cambray et al., 2013).

107

### 108 *Phenotype of GRN depends on local genetic context despite identical topology*

109 We asked whether the local genetic context can influence the phenotype of this GRN. First, we  
110 developed a simple mathematical model of the mechanistic basis of gene expression for this  
111 specific network topology (Fig. S1). This model tracks the concentrations of all three repressors

112 as their respective promoter activities are influenced by their known specific network  
113 interactions. The predicted phenotype of our GRN will depend on the presence of aTc, but not  
114 on the presence of IPTG (Fig. 1A). We wanted to test if this phenotype is independent of the  
115 relative TU order and orientation, and we aimed to build plasmids with all possible 48 relative  
116 TU order permutations with fixed positions (Riordan, J., 2003) such that: (i) every TU can occupy  
117 any of the three positions, (ii) every TU is present only once, (iii) both forward and reverse  
118 orientations are possible, and (iv) network topology stays the same (Fig. 1B). To facilitate  
119 comparisons among all GRNs we used a threshold on the expression of the YFP output for  
120 assigning a binary output value to each environment and so defined a phenotype the GRN can  
121 achieve (for thresholds used to assign a particular phenotype to individual networks, see  
122 *Material and Methods*).

123  
124 The phenotype of strains carrying the resulting 37 plasmids (multiple attempts to clone eleven  
125 of the TU order permutations failed, see *Supplemental material*) varied widely both  
126 quantitatively and qualitatively (Fig. 1CD, S2 and S3). More than half (20) of the tested GRN  
127 permutations showed a phenotype which was qualitatively different than what was predicted  
128 *ab initio*. We also observed multiple quantitative differences in expression levels within one  
129 class of logical phenotypes (e.g. permutations CLT, CTL<sub>r</sub>, T<sub>r</sub>CL and LT<sub>r</sub>C<sub>r</sub>, Fig. 1C).

130  
131 *GRN phenotype is influenced by local genetic context independently of the replicon*  
132 We then asked how and why the changes in relative order of individual TUs affect the  
133 phenotype of the GRN, although network topology and individual genetic components of the

134 GRN (i.e. individual TUs) remain unchanged. In order to disentangle the specific interactions  
135 between network components we focused on six GRNs which differ in relative TU order but not  
136 in gene orientation. These six GRNs show two qualitatively different phenotypes (NOR and NOT  
137 (aTc), Fig. 2A, upper panel). In four out of six strains (LCT, LTC, TCL and TLC), induction with IPTG  
138 shifted *yfp* expression levels to the OFF state. These population-level findings are also observed  
139 at the single cell level (Fig. 2A, lower panel). We tested to what extent our observation from  
140 plasmid-based TUs apply to chromosomally located GRNs by integrating three networks with  
141 varying TU order (CTL, LCT and TLC) at a transcriptionally insulated chromosomal locus (*attB*  
142 site of phage HK022). In line with the plasmid-based GRNs, these strains also showed a  
143 dependency of phenotype on relative TU order, demonstrating that this is not an effect related  
144 to plasmid localization of our GRN (Fig. 2B). When *lacI*, *tetR*, and *cl* are integrated at separate,  
145 transcriptionally insulated loci on the bacterial chromosome, the network phenotype is  
146 identical with the one predicted *ab initio* from its topology, confirming that it is the  
147 transcription of neighboring genes that changes the network's phenotype (Fig. 2C).

148

#### 149 *Differences in cl expression lead to phenotypes that depend on relative TU order*

150 To elucidate the molecular basis of the observed phenotypic variability, we first asked whether  
151 the relative TU order-dependent differences in phenotypes can be traced back to changes in  
152 levels of *cl* gene expression. We isolated total RNA from strains differing in relative position of  
153 the *cl* gene (CLT and TLC) grown in the absence or presence of IPTG, and quantified *cl* transcript  
154 levels using RT-qPCR. *cl* expression after IPTG induction in strain TLC was over 10-fold higher  
155 than in strain CLT (Fig. 3A), suggesting that the differences in *yfp* fluorescence were indeed due



156 to differences in *cl* expression. In order to corroborate our findings at the mRNA level with  
157 protein expression levels, we replaced the *cl* gene in strains CLT and TLC with *yfp*, and  
158 confirmed relative gene order effects on *yfp* expression directly (Fig. 3B).  
159 Expression of the *cl* gene in our GRN is controlled by TetR (Fig. 1A). Thus differences in *cl*  
160 expression levels between the different relative TU order variants can be due to (i) global  
161 changes in gene expression of  $P_{tet}$  controlled genes, which propagate to changes in expression  
162 of *cl*; or (ii) local effects, such as transcriptional read-through or changes in supercoiling levels.  
163 To distinguish between these two possibilities, we measured the activity of the promoter  
164 driving *cl* expression by supplying  $P_{tet}$ -*cfp* in *trans* on a second plasmid. In all six strains with  
165 different relative TU order,  $P_{tet}$  activity was strongly induced with aTc, while no  $P_{tet}$  activation  
166 was observed after IPTG induction (Fig. 3C). This indicates that *cl* expression observed after  
167 IPTG induction is not due to global removal of TetR repression, but rather due to a local effect  
168 on *cl* gene expression. Furthermore, levels of TetR-dependent repression do not depend on  
169 relative TU order. This local effect depends on gene expression from the *lac* promoter in an  
170 IPTG-dependent manner (Fig. 3D).

171

172 *Transcriptional read-through is the molecular mechanism underlying context-dependent GRN*  
173 *phenotype*

174 We hypothesized that transcriptional read-through would be consistent with the context-  
175 dependent effects we measured. We observed that in the cases when the *cl* gene is at the  
176 second or third position of the GRN (Fig. 1B), transcriptional read-through from upstream TUs  
177 (*tetR* and/or *lacI*) may be enough to transcribe *cl* despite TetR-dependent repression, and in

178 turn shut down  $P_R$  activity in response to IPTG (see also *Supplemental material* for effects of  
179 transcriptional read-through into *tetR* and *lacI*). We asked whether the potential for  
180 transcriptional read-through, together with the knowledge about the individual genetic  
181 components of this network, is enough to unambiguously predict the phenotype of the GRN  
182 permutation variants we built. For this purpose, we added the effects of transcriptional read-  
183 through to our mathematical model such that promoter activities were now influenced not only  
184 by network interactions but also by the activity of neighboring genes (Fig. S1).

185 To facilitate the analysis of numerous GRNs we divided the 48 possible TU permutations into 24  
186 pairs that differ only in orientation with respect to the plasmid backbone (Fig. S2 and S3). 26  
187 networks/13 pairs showed the same phenotype in both orientations (Fig. S2), 8 networks/4  
188 pairs showed different phenotype in each orientation (Fig. S3A), for 3 networks no  
189 corresponding pair was cloned (Fig. S3B) and 8 networks/4 pairs were not cloned.

190 For networks showing the same phenotype in both orientations we assumed there is no  
191 significant influence of plasmid backbone elements (Fig. S2). Here, the model including  
192 transcriptional read-through agreed for 20 networks/10 pairs (Fig. S2A), and did not agree with  
193 6 networks/3 pairs (Fig. S2B). A null-model that did not account for transcriptional read-through  
194 failed to predict the observed differences in phenotypes.

195 Our experimental approach to test the transcriptional read-through hypothesis is based on the  
196 premise that transcriptional read-through does not depend on a functional promoter of a  
197 downstream gene, in contrast to supercoiling- or RNAP concentration-dependent effects.  
198 Therefore, if GRN behavior is due to transcriptional read-through, mutating the  $P_{tet}$  promoter  
199 should not affect the responsiveness to IPTG. We tested this prediction by introducing two

200 point mutations into the -10 element of  $P_{tet}$  in a number of different strains (Fig. 4A and Fig. S4).  
201 These two point mutations render  $P_{tet}$  inactive and therefore prevent transcription from this  
202 promoter (Fig. S5). The phenotype in the absence of any inducers and with only IPTG was  
203 identical to the phenotype in the original strains, thus confirming that *cl* expression is initiated  
204 at an upstream promoter (Fig. 4B and Fig. S4).

205 If the mechanism behind different phenotypes is transcriptional read-through, change of the  
206 terminator strength should lead to a change in phenotype. We have chosen network TLC in  
207 which our model predicted that a change of terminator strength will lead to alter the  
208 phenotype. In this GRN we exchanged the T1 terminator preceding *cl* to either a stronger  
209 double T1T2 terminator of the *rrnB* locus, or to the weaker *Tcrp* and *TtonB* terminators  
210 (Cambray et al., 2013). Change from T1 to T1T2 changes the phenotype of the network to the  
211 one predicted by the model and observed when single transcription factors are incorporated in  
212 separate loci on the chromosome (Fig. 5A). Change from T1 to either *Tcrp* or *TtonB* leads to a  
213 completely OFF phenotype, as expected when transcriptional read-through through weaker  
214 terminators leads to expression of *cl* in all four conditions.

215 Read-through transcripts, i.e. transcripts of more than one gene, can be detected by Northern  
216 blotting. We isolated total RNA from strains with T1, *Tcrp* and *TtonB* grown in the absence or  
217 presence of IPTG, and visualized transcripts on Northern blot (Fig. S6). We expected to detect  
218 *lacI* transcripts in all strains, and in case of transcriptional read-through, longer transcripts  
219 encompassing both *lacI* and *cl*. No read-through transcript starting in *tetR* was expected, since  
220 the T1 terminator separating *tetR* from *lacI* carries a RNaseE recognition site in its stem (Apirion  
221 and Miczak, 1993; Szeberényi et al., 1984), which makes it impossible to distinguish between

222 read-through transcripts and transcripts originating from individual promoters. The same is true  
223 for the strain harboring T1 terminators only, in which we expected to see only single gene  
224 transcripts.

225 We detected read-through transcripts encompassing both *lacI* and *cl* in strains carrying *Tcrp*  
226 and *TtonB*, thus directly demonstrating transcriptional read-through in these two strains. We  
227 also detected fragments encompassing only the *cl* gene. This may suggest RNA processing at a  
228 cryptic RNase site, or additional effects, such as dislodgement of repressor by RNA polymerase  
229 passing through the terminator (Palmer et al., 2011). To rule out the emergence of unpredicted  
230 promoters, we fused the junctions between *lacI* and *cl*, encompassing T1, *Tcrp* and *TtonB*  
231 terminators in front of YFP, but did not detect any significant increase in fluorescence (Fig. S7).

232 In order to check whether a combination of two terminators would act additively on stopping  
233 transcriptional read-through, we inserted the weaker *crp* terminator in front of T1 terminator in  
234 a different GRN, LCT, resulting in network  $L^{crpT1}CT$ . This network showed an intermediate  
235 phenotype, consistent with predicted decrease in *cl* expression (Fig. 5B).

236 Taken together, these results strongly support that transcriptional read-through is the  
237 molecular mechanism underlying the relative TU dependent phenotypes we observe, and thus  
238 the different logic phenotypes our GRN can achieve.

239

#### 240 *Interplay of several molecular mechanisms shapes GRN phenotype*

241 Eight networks (four pairs) showed different phenotypes in each orientation and in all cases  
242 one phenotype from the pair was supported by our model while the other was not. This  
243 suggests that there was a significant influence of the plasmid backbone elements. Just like the

244 individual TUs constituting our GRN, TUs located on the plasmid backbone (namely the  
245 kanamycin resistance gene *kanR* and *repA* in the plasmid origin of replication) also have the  
246 potential to influence expression of neighboring TUs, and hence the GRN phenotype. To rule  
247 out transcriptional read-through from the *repA* gene located at the plasmid origin of  
248 replication, we cloned a promoterless *yfp* gene downstream of *repA*, however we did not  
249 detect any significant change in fluorescence (Fig. S8A). We noticed that there is a slight change  
250 in repression of  $P_{tet}$  depending on the relative orientation to the plasmid backbone (Fig. S8B).  
251 Since supercoiling can influence gene expression, especially of plasmid-located genes, we also  
252 expect supercoiling-mediated effects to modulate expression and thus influence phenotypes of  
253 our GRN (Sobetzko, 2016; Yeung et al., 2017).

254

#### 255 *Local genetic context modulates regulation of lac promoter*

256 Our simplified synthetic system allowed us to observe the effects of local genetic context  
257 created in a systematic manner by arranging transcription factor genes next to one another on  
258 a plasmid (Fig. 2A) or the chromosome (Fig. 2B). We also decided to test our findings in a native  
259 regulatory network of *E. coli* composed of one transcription factor – LacI, and the promoter it  
260 controls,  $P_{lac}$ , and asked whether native local genetic context has the potential to modulate its  
261 phenotype. Using a  $\Delta lacI \Delta lacZYA$  genetic background we inserted the *lac* promoter driving *yfp*  
262 expression in a transcriptionally insulated locus (phage  $\lambda$  attachment site, *attB*) and the *lac*  
263 repressor, *lacI*, into one of three loci on the right replicore (Fig. 6A). Subsequently, we  
264 measured gene expression from the *lac* promoter,  $P_{lac}$ , in these three strains by monitoring *yfp*  
265 fluorescence levels after treatment with increasing IPTG concentrations. The shape of the

266 induction curve was considered to be the network's phenotype. It should be stressed that the  
267 *lacI* gene (under control of its native promoter) was inserted only into non-coding chromosomal  
268 regions, shortly after an endogenous terminator. The loci for insertion were chosen such that  
269 genes downstream of the terminator were non-essential and in the same orientation as the  
270 genes upstream. Chosen terminators were of different strengths: strong, middle, and weak (D.  
271 Toledo Aparicio, M. Lagator and A. Nagy-Staron, personal communication, September 2019)  
272 and were located in close vicinity (39' - 43' on MG1655 chromosome) to avoid gene dosage and  
273 transcription factor – promoter distance effects (Block et al., 2012; Kuhlman and Cox, 2012).  
274 Moreover, the growth medium (and hence cell growth rate) was chosen such as to further  
275 minimize gene dosage effects (Block et al., 2012). To assess whether genomic location affected  
276 response to IPTG, we measured *yfp* fluorescence reporting on  $P_{lac}$  expression levels at several  
277 points along the IPTG concentration gradient. If *lacI* is inserted after a weaker terminator,  
278 expression from *lac* promoter is lower for a range of IPTG concentrations as compared to strain  
279 where *lacI* is inserted after a strong terminator (Fig. 6B). We conducted an analysis of variance  
280 (ANOVA) to compare the effect of genomic localization on  $P_{lac}$  activity. There was a significant  
281 effect for five IPTG concentrations tested, and post hoc comparisons using the Tukey test were  
282 performed (Fig. S9). We also directly assessed the amount of *lacI* transcript in these three  
283 strains using RT-qPCR and saw differences in expression levels consistent with the observed  $P_{lac}$   
284 induction curves (Fig. 6C).

285 In this minimal network consisting of a transcription factor and the promoter it controls, the  
286 network phenotype is indeed modulated only by the endogenous local genetic context, likely  
287 due to varying levels of transcriptional read-through into the *lacI* gene. To verify this, we

288 performed PCR on cDNA from the three strains, using primers spanning the intergenic regions  
289 upstream of *lacI* (Fig. 6D). In all three cases, a DNA band corresponding to the amplification of  
290 the cDNA spanning the intergenic region was obtained, confirming read-through transcription  
291 into *lacI* from the upstream gene (no band was obtained with RNA as template). This  
292 corroborates our findings that genetic context of network elements can modulate network  
293 phenotype and that any kind of chromosomal rearrangement has the potential to alter network  
294 output.

295

## 296 **Discussion**

297 By comprehensively shuffling the relative TU order in a synthetic GRN, we show that local  
298 genetic context can significantly influence the phenotype of GRNs both quantitatively and  
299 qualitatively, and thus can qualitatively and quantitatively change the function a GRN performs.  
300 Hence, the phenotype of a GRN cannot be fully understood without reference to the local  
301 genetic context of its individual network components. We find that our GRN can access multiple  
302 phenotypes by simply shuffling the relative order of TUs without any changes in promoters and  
303 coding sequence. Thus, changes in regulatory connections between single regulons can be  
304 achieved solely by changes in local genetic context, which represent a category of mutations  
305 that is to be contrasted from single base pair mutations. The local genetic context is not limited  
306 to proximal transcription factors which are part of the same GRN, like our synthetic plasmid  
307 system that represents the most direct example. In fact, the local context effects and in  
308 particular transcriptional read-through can occur anywhere on the chromosome (Fig. 6),

309 indicating that any chromosomal rearrangement has the potential to alter not only the  
310 expression levels of a gene but importantly also the function of a GRN.

311

312 Local genetic context of a TU can change after a deletion, duplication, insertion, inversion or  
313 translocation event (Periwal and Scaria, 2015). These mutational events are often mediated by  
314 mobile genetic elements, and their rates depend on the type of mobile element, the precise  
315 genomic location as well as the organism (Díaz-Maldonado et al., 2015; Periwal and Scaria,  
316 2015; Steinrueck and Guet, 2017). Reported rates span a wide range (from  $10^{-3}$  to  $10^{-8}$  per cell  
317 per generation), but are typically orders of magnitude higher than rates of point mutations  
318 (Hudson et al., 2002; Saito et al., 2010; Sousa et al., 2013; Tomanek et al., 2020). Given this  
319 elevated frequency of small- and large-scale genomic rearrangements in various bacterial  
320 species, changes in local genetic context have the potential to shape bacterial phenotypes even  
321 in absence of sequence changes. Specific local genetic contexts could have arisen in response to  
322 selection for changes in gene expression levels. Indeed, genomic rearrangements were found to  
323 significantly change expression patterns in numerous organisms, including *E. coli*, *Bordetella*  
324 *pertussis* and *Lactobacillus rhamnosus* (Brinig et al., 2006; Douillard et al., 2016; Raeside et al.,  
325 2014; Weigand et al., 2017). It needs to be stressed that the impact of local genetic context of  
326 GRN elements on fitness will strongly depend on the network's output. Examples of how even a  
327 small effect can be strongly amplified further downstream in a regulatory network are the  
328 regulatory circuit governing lysogenic and lytic states of phage lambda, or the processes behind  
329 entry into sporulation or genetic competence in *Bacillus subtilis* (Dubnau and Losick, 2006;  
330 Narula et al., 2012; Ptashne, 2004; Smits et al., 2005).



331 We find that transcriptional read-through is an important molecular mechanism behind the  
332 effects we observe in our synthetic GRN system. Changes in the strength of transcriptional  
333 termination generally require just a small number of mutations, often only individual point  
334 mutations (San Millan et al., 2009; Schuster et al., 1994; Weigand et al., 2017). Importantly,  
335 despite our synthetic GRN having been designed to restrict transcriptional read-through by  
336 using a single very strong transcriptional terminator, we observed a variety of phenotypes our  
337 GRN can access (Cambray et al., 2013). Naturally occurring transcriptional terminators cover a  
338 wide range of efficiencies and hence have potential to create a large number of regulatory  
339 connections between neighboring TUs (Cambray et al., 2013; Reynolds et al., 1992).

340

341 Most studies on chromosomal position effects focus explicitly on molecular mechanisms other  
342 than transcriptional read-through by insulating a reporter system with strong terminators  
343 (Berger et al., 2016; Block et al., 2012; Sousa et al., 1997). Given the fact that endogenous  
344 terminators vary widely in their efficiency, we argue that transcriptional read-through from  
345 neighboring genes is an inherent component of chromosomal position effects. It can  
346 significantly add to other genetic context-dependent effects resulting from gene dosage or DNA  
347 supercoiling. Such complex interplay of mechanisms can be seen in our synthetic genetic  
348 system, as not all phenotypes we see can be explained by transcriptional read-through alone  
349 and there are likely other molecular mechanisms of a more global nature influencing the  
350 phenotypes of our GRN. This observation highlights how challenging it is to disentangle all of  
351 the complex genetic interactions even in a very simplified synthetic GRN built out of the best-  
352 characterized transcription factors. Understanding simple synthetic systems helps to dissect

353 and explain the dynamics of more intricate and complex cellular interactions, following the  
354 tradition of simple model systems that have been powerful throughout the history of molecular  
355 biology.

356

357 Gene expression and its regulation is influenced by multiple coexisting molecular mechanisms,  
358 through the concerted action of DNA binding proteins, including RNA polymerase, transcription  
359 factors, topoisomerases, and nucleoid-associated proteins acting at different levels of  
360 organization: from short promoter sequences to mega-base large DNA macro-domains (Junier,  
361 2014; Lagomarsino et al., 2015). Here, we show that the local genetic context created by the  
362 relative TU order can act as one of the genetic mechanisms shaping regulatory connections in  
363 regulons (Fig. 7). Changes in local genetic context have the potential to place an individual TU  
364 into two independent regulons without the need to evolve complex regulatory elements.  
365 Transcriptional read-through, by enabling a diversity of gene expression profiles to be accessed  
366 by shuffling of individual TUs, may be one of the mechanisms shaping the evolutionary  
367 dynamics of bacterial genomes. Indeed, the fact that gene expression levels of one gene can be  
368 influenced by the gene expression levels of its immediate neighbor has important  
369 consequences for the evolution of operons. For a long time it has been debated whether any  
370 selective advantage is gained from the physical proximity of two TUs and how this physical  
371 proximity can be maintained before common transcription factor-based transcriptional  
372 regulation can evolve (Lawrence and Roth, 1996). We suggest that physical proximity alone can  
373 result in increased co-expression due to transcriptional read-through and thus can be  
374 advantageous by changing gene expression patterns without the need for any changes in

375 promoter sequences or to the specificity of transcription factors. Indeed, correlated expression  
376 of genes reaching beyond the level of an operon has been recently observed (Junier et al.,  
377 2016; Junier and Rivoire, 2016). Our results also have important implications for comparative  
378 genomics, as sequence conservation does not necessarily equal functional conservation. Finally,  
379 there is a lesson for engineering living systems, as our results underscore the importance of  
380 understanding how nature itself can compute with GRNs (Guet et al., 2002; Kwok, 2010).

381

382 The simple synthetic and endogenous examples of GRNs we studied here, show how local  
383 genetic context can be a source of phenotypic diversity in GRNs, as the expression of a single  
384 gene or operon can be linked to levels and patterns of gene expression of its immediate  
385 chromosomal neighborhood. Systematic studies that utilize simple synthetic systems offer the  
386 promise of understanding how the genetic elements interact and result in the diversity of  
387 phenotypes we observe.

388 ***Supplemental material***

389 *Predicted effects of transcriptional read-through into each of the TFs*

390 In our synthetic GRN, repressor-encoding genes, are separated by identical T1 terminators.  
391 Transcriptional read-through can in principle happen at any terminator. This scenario is also  
392 incorporated in our model. However, in our experimental approach we focused only on read-  
393 through into *cl*, which is the network element that directly regulates the level of the measured  
394 output *yfp* by binding to its promoter  $P_R$  (Fig. 1A). Transcriptional read-through into *tetR* or *lacI*  
395 from *cl* would happen only after induction with aTc, when output is insensitive to presence of  
396 LacI and TetR. Transcriptional read-through from *lacI* into *tetR* can only increase expression of  
397 *tetR*, which even without this effect fully represses  $P_{tet}$ . Transcriptional read-through from *tetR*  
398 into *lacI* could potentially make a difference when strains are grown without IPTG, but due to  
399 the negative feedback loop and tight repression of  $P_{tet}$  these effects are likely too subtle to be  
400 visible in our set-up. Thus, for the particular network topology of this study, any changes in  
401 levels of LacI and TetR due to transcriptional read-through cannot impact in any way the level  
402 of YFP.

403

404 *Threshold for assigning a phenotype to individual GRNs*

405 Figure S1 shows fluorescence levels of all the strains carrying different TU order permutations  
406 of our network. To define a phenotype that each of the GRNs can achieve, we assign a binary  
407 output value for each input state. For each strain, fluorescence was normalized to the highest  
408 expression level at the given time point. The OFF state was defined as at least three-fold  
409 repression compared to the highest ON state. Moreover, the minimal ON value in each GRN

410 was required to be at least three-fold greater than the maximal OFF value. A distribution of  
411 logical phenotypes for a varying threshold can be seen in Figure S6. In the mathematical model,  
412 the same procedure is followed. Expression values coming from the mathematical model are  
413 normalized by the highest expression value and then a threshold is applied to determine ON  
414 and OFF states. The threshold value is constant across all gene orders and orientations.

415

#### 416 *Cloning of 48 TU order permutations*

417 Despite repeated attempts, cloning of eleven of the 48 TU order permutations failed. Eight of  
418 them were not clonable in either orientation with respect to the plasmid backbone. For three  
419 networks, we were able to clone only one orientation (Fig. S3B). Generally, we experienced  
420 increased difficulties in cloning GRNs where TUs were not oriented in one direction, which may  
421 at least in part be traced back to a number of highly homologous sequences in our plasmids.

422

#### 423 *A model for the impact of transcriptional read-through on gene expression*

424 In order to test the mechanistic basis of the changes in gene expression caused by changes in  
425 TU order and orientation, we developed a mathematical model that takes into account  
426 transcriptional read-through between adjacent TUs. The basic scheme is depicted in Figure S4.  
427 We model the rate of transcript production by a constant term ( $k_i$ , the constitutive expression  
428 rate of the promoter), and an input dependent term that models the repression by other

429 components  $(-(1-I)\frac{X}{K_X + X})$  and a degradation term  $(-\delta X)$ .

$$\begin{aligned} \frac{dL}{dt} &= k_L - (1 - I_1) \frac{L}{K_L + L} - \delta L + r_\chi^L \\ \frac{dT}{dt} &= k_T - (1 - I_1) \frac{T}{K_T + T} - \delta T + r_\chi^T \\ \frac{dC}{dt} &= k_C - (1 - I_2) \frac{C}{K_C + C} - \delta C + r_\chi^C \end{aligned}$$

430  
431 L, T and C correspond to *lacI*, *tetR* and *cl*, respectively,  $I_1$  and  $I_2$  correspond to the presence or  
432 absence of IPTG and aTc, respectively.  $I_1$  and  $I_2$  can take only one of two values, 0 or 1. It should  
433 be noted that *lacI* and *tetR* share the same promoter and are therefore controlled by the same  
434 rates of production.

435 Importantly, we include a term  $r_\chi$  that models transcriptional read-through. This term takes  
436 into account the order and orientation of the specific gene network. When two genes, A and B,  
437 are adjacent to each other and share the same orientation this term will take the values  $r_{\bar{A}B}^A = 0$   
438 for gene A and  $r_{\bar{A}B}^B = \mu A'$  for gene B, where  $A'$  corresponds to the rate of transcription of gene  
439 A  $(k_A - (1 - I_x) \frac{A}{K_A + A})$ . The output of the network is an inverse threshold function of the  
440 expression level of *cl*, so that the output is ON if *cl* expression is below the threshold  $\tau$  and OFF  
441 if above it.

442 In order to obtain the function realized by each of the networks, this system of differential  
443 equations is solved for the steady state for the 4 possible states of the  $I_1$  and  $I_2$  (0,0), (0,1), (1,0),  
444 and (1,1). For each network, the expression levels are normalized by the state with the highest  
445 expression and then a threshold is applied to the expression level of *cl* to determine if the  
446 network is in an ON or OFF state (see above). For mathematical simplicity and to reduce the

447 number of free parameters we assumed:  $k_L = k_C = 1$ ,  $\delta=1$ ,  $K_L = K_T = K$ , leaving essentially two free  
448 parameters: the half-repression point  $K$  and the read-through rate  $\mu$ .  
449 In order to obtain the parameters region that allows this system of ordinary differentials  
450 equations to fit the experimental data, we performed a grid search in these two parameters.  
451 The results for  $\tau = 2/5$  can be seen on Fig. S4C.

452

#### 453 *Bacterial strains and growth conditions*

454 All strains used in this study are derivatives of *E. coli* MG1655 and are listed in Table S1.  
455 Plasmids are listed in Table S3. Strain and plasmid construction is described in detail below.  
456 M9CA+glycerol medium (1x M9 salts, 0.5% glycerol, 2 mM MgSO<sub>4</sub>, 0.1 mM CaCl<sub>2</sub>, 0.5%  
457 casamino acids) was routinely used for bacterial growth unless otherwise stated. Selective  
458 media contained ampicillin at 100  $\mu\text{g ml}^{-1}$ , kanamycin at 50  $\mu\text{g ml}^{-1}$  (for plasmid located  
459 resistance cassette) or 25  $\mu\text{g ml}^{-1}$  (for chromosomally located resistance cassette), and  
460 chloramphenicol at 15  $\mu\text{g ml}^{-1}$ . Solid media additionally contained 1.5% (w/v) agar.  $\beta$ -D-  
461 thiogalactopyranoside (IPTG) was used at 1 mM unless stated otherwise, anhydrotetracycline  
462 (aTc) at 100 ng ml<sup>-1</sup>.

463

#### 464 *Strain and plasmid construction*

465 All strains and plasmids used in this study are listed in Tables S1 and S3, respectively. Strain  
466 used for measuring GRN behavior was based on TB201, which is an *E. coli* MG1655 derivative  
467 carrying a *attP21::P<sub>R</sub>-yfp* allele.  $\Delta\text{lacI785}::\text{kanR}$  and  $\Delta\text{lacZ4787}::\text{rrnB-3}$  alleles were transduced  
468 (P1) into TB201 from JW0336, and the Kan<sup>R</sup> marker removed (pCP20 (Cherepanov and

469 Wackernagel, 1995)), resulting in strain **ASE023**. *recA* gene of strain ASE023 was in-frame  
470 deleted using  $\lambda$  Red recombination (Datta et al., 2006). Kan<sup>R</sup> marker was amplified from pKD13  
471 (Datsenko and Wanner, 2000) and introduced into the *recA* gene of ASE023. Kan<sup>R</sup> cassette was  
472 subsequently removed (pCP20 (Cherepanov and Wackernagel, 1995)) resulting in strain **KT131**.  
473 Strain **KT132** was used for measuring behavior of networks containing *yfp* instead of *cl* and was  
474 constructed as described above, with the parent strain being MG1655 instead of TB201. Strain  
475 **Frag1B** was used to supply constitutively expressed *tetR* encoded on the chromosome and  
476 measure orientation-dependent repression of  $P_{LtetO1}$ .  
477 Plasmids were constructed by using standard cloning techniques (Sambrook and Russell, 2001)  
478 with enzymes and buffers from New England Biolabs, according to the respective protocols. All  
479 primer sequences used for this study are listed in Table S2. For cloning and plasmid propagation  
480 *E. coli* Frag1D was grown routinely in lysogeny broth (LB) at 30°C with agitation (240 rpm). All  
481 plasmids and strains were verified by sequencing.  
482 To facilitate directional cloning of the DNA fragments, and at the same time reduce the  
483 background of clones containing empty plasmids, we inserted a DNA fragment encoding  
484 *mCherry* flanked with BglII sites into the cloning vector. This facilitated isolation of completely  
485 cut vector as well as identification of background clones on a plate due to their fluorescence.  
486 The fragment encoding *mCherry* was amplified from vector pBS3Clux (Radeck et al., 2013) and  
487 cloned into PstI and SmaI sites of vector pLA2 (Haldimann and Wanner, 2001), creating plasmid  
488 **pAS017**. The plasmid used for cloning of GRN permutations, **pAS019**, was constructed by  
489 amplifying the vector backbone (consisting of kanamycin resistance cassette, and SC101\* origin



490 of replication) of pZS\*2R-*gfp* and inserting the BglI sites-flanked mCherry cassette from pAS017  
491 into its Scal and EcoRI sites.

492 Fragments encoding  $P_{LacO1}$ -*tetR*,  $P_{LacO1}$ -*lacI*, and  $P_{TetO1}$ -*cl* were amplified from the original D052  
493 plasmid (Guet et al., 2002) and cloned into XhoI and XbaI sites of vector pZS\*12-*gfp*  
494 (simultaneously removing the *gfp* cassette), resulting in plasmids **pAS014**, **pAS015** and **pAS016**,  
495 respectively. All three repressors are tagged with *ssrA* degradation tag to reduce the half-life of  
496 the proteins (Keiler et al., 1996).

497 For construction of the set of gene order permutations, fragments containing  $P_{LacO1}$ -*tetR*,  
498  $P_{LacO1}$ -*lacI*, and  $P_{TetO1}$ -*cl* were amplified from pAS014, pAS015 and pAS016, respectively. The  
499 fragment containing  $P_{TetO1}$ -*yfp* was amplified from pZS\*11-*yfp*. The primers were designed to  
500 create BglI restriction sites flanking the genes so that directional and ordered cloning was  
501 possible. Equimolar amounts of the fragments were ligated using T4 DNA ligase. The respective  
502 trimer was purified from an agarose gel and cloned into BglI sites of pAS019, resulting in  
503 plasmids **pN1-54**. **pKT10**, the empty control plasmid, was constructed by removing *mCherry*  
504 from pAS019 using XhoI and Sall and ligating the compatible overhangs. Mutations in the -10  
505 promoter element of plasmids pAS016 and pZS\*11-*yfp* were introduced by site-directed  
506 mutagenesis. Primer design and mutagenesis were performed according to the manufacturer's  
507 instructions for the QuikChange II site-directed mutagenesis kit (Agilent Technologies) resulting  
508 in plasmids **pAS023** and **pAS024**. Plasmid pAS023 served as template for construction of  
509 network plasmids with  $P_{tet-10}$  mutation (**pAS026**, **pAS045-7**, and **pAS050-1**). Terminators T1T2,  
510 *Tcrp* and *TtonB* were cloned into XbaI site of plasmid pAS015, resulting in plasmids **pAS020**,  
511 **pAS021** and **pAS038**, respectively. These plasmids served as template for construction of

512 network plasmids with exchanged terminators (**pAS039**, **pAS040**, **pAS053** and **pAS055**).  
513 Promoterless *yfp* gene, and  $P_{LtetO1}$ -*yfp* were amplified from pZS\*11-*yfp* and cloned with BglI into  
514 pAS019 resulting in plasmids **pAS035**, **pAS036** and **pAS037**. DNA fragments between repressor  
515 genes containing terminators T1, *Tcrp* and *TtonB* were cloned into plasmid pAS035, resulting in  
516 plasmids **pAS041**, **pAS042** and **pAS043**, respectively.

517 Strains with GRNs  $P_{LtetO1}$ -*cl*- $P_{LlacO1}$ -*tetR*- $P_{LlacO1}$ -*lacI* (CTL),  $P_{LlacO1}$ -*lacI*- $P_{LtetO1}$ -*cl*- $P_{LlacO1}$ -*tetR* (LCT) and  
518  $P_{LlacO1}$ -*tetR*- $P_{LlacO1}$ -*lacI*- $P_{LtetO1}$ -*cl* (TLC) integrated into the chromosome were constructed using  $\lambda$   
519 Red recombination (Datta et al., 2006). Appropriate fragments including Kan<sup>R</sup> cassette were  
520 amplified from plasmids pN2, pN3 and pN6 and integrated into phage HK022 attachment site of  
521 ASE023 resulting in strains **ASE031**, **ASE032** and **ASE033**, respectively. Strain with three  
522 repressors integrated into separate loci on the chromosome originated from strain KT131,  
523 which was subsequently transformed with plasmids **pKT12** (carrying  $P_{LlacO1}$ -*lacI* and integrating  
524 into phage HK022 attachment site), and **pAS022** (carrying  $P_{LlacO1}$ -*tetR* and integrating into phage  
525  $\lambda$  attachment site). Both pKT12 and pAS022 are based on modified CRIM plasmids (Haldimann  
526 and Wanner, 2001; Pleška et al., 2016). After each round of transformation, the Cam<sup>R</sup> marker  
527 was removed (pCP20 (Cherepanov and Wackernagel, 1995)). The  $P_{LtetO1}$ -*cl* fragment was  
528 integrated into *26old* locus using  $\lambda$  Red recombination (Datta et al., 2006), resulting in strain  
529 **ASE030**.

530 Strain with  $P_{lac(-131-410)}$ -*yfp* originated from HG105, which is an *E. coli* MG1655 derivative  
531 carrying a  $\Delta lacZYA \Delta lacI$  allele (Garcia et al., 2011). HG105 was transformed with plasmid **pCC01**  
532 (carrying  $P_{lac(-131-410)}$ -*yfp* and integrating into phage  $\lambda$  attachment site) resulting in strain **ASE039**.  
533 pCC01 is based on modified CRIM plasmid (Haldimann and Wanner, 2001; Pleška et al., 2016).

534 Cam<sup>R</sup> marker was subsequently removed (pCP20 (Cherepanov and Wackernagel, 1995)). To  
535 facilitate transduction of *lacI* gene, Cam<sup>R</sup> cassette was integrated downstream of *lacI* in strain  
536 MG1655 using  $\lambda$  Red recombination (Datta et al., 2006), resulting in strain **ASE041**. *lacI* gene  
537 and Cam<sup>R</sup> cassette were then integrated into *flhC*, *yeaH*, and *asnT* loci, followed by Cam<sup>R</sup>  
538 cassette removal, resulting in strains **ASE046**, **ASE047**, and **ASE048**, respectively.

539

#### 540 *Fluorescence assays*

541 YFP fluorescence of *E. coli* strains harboring different permutational GRN variants was assayed  
542 using a Synergy H1 microplate reader (BioTek). Strains were grown in a 96-well plate at 30°C  
543 with aeration on a microplate shaker in the dark. Routinely, M9CA+glycerol medium was used.  
544 Strains ASE031, ASE032 and ASE033 were grown in LB. Overnight cultures started from single  
545 colonies were diluted 1:1000 into fresh medium (supplemented with aTc and/or IPTG as  
546 indicated) and grown to reach exponential phase. OD<sub>600</sub> and fluorescence (excitation 515,  
547 emission 545; endpoint-reads; gain 90; emission side: bottom) were recorded. For strains  
548 grown in LB, cells were centrifuged and resuspended in PBS (supplemented with 1 mM MgSO<sub>4</sub>  
549 and 0.1 CaCl<sub>2</sub> (Tomasek, K. et al., 2018)) prior to measurements. Specific fluorescence activity is  
550 given by the raw fluorescence output normalized by cell density. For GRN permutations  
551 fluorescence is reported normalized to the fully unrepressed P<sub>R</sub> promoter.

552

#### 553 *Total RNA purification*

554 Strains were inoculated from single colonies and grown in 10 ml M9CA+glycerol medium for 8  
555 hours with aeration in the dark. Total RNA was extracted from approximately 5\*10<sup>8</sup> cells using

556 RNAprotect Bacteria reagent and RNeasy Mini kit (Qiagen). Briefly, after removal of the growth  
557 medium the cells were resuspended in 500  $\mu$ l M9CA+glycerol medium and 2 volumes of  
558 RNAprotect Bacteria reagent. Thereafter cells were enzymatically lysed and digested with  
559 lysozyme and Proteinase K according to the manufacturer's recommendation.  
560 The extracted total RNA was purified from residual plasmid DNA using the DNA-free™ DNA  
561 removal kit (Thermo Fisher Scientific) using 4 U rDNase at 37°C for 1 hour in total. First 2 U  
562 rDNase were added and after 30 minutes 2 more units were added for another 30 minutes  
563 incubation time. The RNA concentration was measured using the NanoDrop 200 UV-Vis  
564 spectrophotometer (NanoDrop products, Wilmington, DE) and the integrity of the purified RNA  
565 was verified on an agarose gel. RNA purity was verified using 1x OneTaq 2x master mix and 0.2  
566  $\mu$ M primers KTp38 and KTp39 for plasmid networks and primers AS271-2, AS277 and AS280 for  
567 chromosomal *lacI* strains running an end-point PCR.

568

#### 569 *cDNA preparation and quantitative real-time PCR*

570 cDNA was reverse transcribed using the iScript™ cDNA synthesis kit (BioRad) supplemented  
571 with random hexamers. 1  $\mu$ g total RNA were used as template in a 20  $\mu$ l reaction yielding  
572 approximately 50 ng/ $\mu$ l cDNA. As no reverse transcriptase control the reverse transcriptase  
573 reaction was performed with all components except the reverse transcriptase to verify the  
574 absence of DNA contaminations. The products of the reverse transcriptase reaction were  
575 column purified.  
576 Measurement of transcript abundance was performed by quantitative real-time RT-PCR using  
577 the GoTaq qPCR Master Mix (Promega, Mannheim, D) supplemented with SYBR Green

578 according to the manufacturer's procedure with minor modifications. 100 pg cDNA for plasmid  
579 networks and 500 pg of cDNA for chromosomal strains was used. Primer pairs (Table S2) were  
580 designed to quantify the transcription level of *cl* and *lacI*. Expression of the kanamycin  
581 resistance marker on the network plasmids and *cysG* on the chromosome were monitored as  
582 constitutive references. The qPCR reaction was carried out on the BIO-RAD qPCR C1000 system  
583 using 0.3  $\mu$ M of the respective primers for *cl* and *kanR* amplification and 0.3  $\mu$ M and 0.9  $\mu$ M of  
584 the respective primers for *lacI* and *cysG* amplification at an annealing temperature of 62°C. The  
585 amplification efficiency, the linearity, including the slope and the  $R^2$ , and specificity of each  
586 primer pair was determined by amplifying experimental triplicates of a serially dilution mixture  
587 of pN1 plasmid or genomic DNA of one of the chromosomal strains (1 ng to 1 pg). Using the  
588 conditions mentioned above the amplification efficiency was almost equal for all primer pairs.  
589 Expression of *cl* and *lacI* was calculated as fold changes using the comparative  $C_T$  method ( $\Delta\Delta C_T$ )  
590 (Livak and Schmittgen, 2001).

591

#### 592 *Northern blot assay*

593 After overnight ethanol precipitation (0.1 volume 1M sodium acetate, 2.5 volume ethanol) 10  
594  $\mu$ g of total RNA were denatured with 2x RNA loading buffer (4% 10x TBE-DEPC, 0.02% Xylene  
595 cyanol, 0.02% Bromphenol blue, 94% Formamide) for 15 minutes at 65°C. The high range RNA  
596 molecular weight marker (RiboRuler High Range RNA Ladder, Thermo Fisher Scientific) was  
597 dephosphorylated with FastAP Thermosensitive Alkaline Phosphatase (Thermo Fisher Scientific)  
598 and 5'-end labelled with  $\gamma$ - $^{32}$ P-ATP and T4 Polynucleotide Kinase (Thermo Fisher Scientific)  
599 according to the manufacturer's instructions. The denatured RNA samples and high range RNA

600 molecular weight marker were separated on a 1.2% denaturing agarose gel (1.2x MOPS, 19.4%  
601 formaldehyde; running buffer: 1x MOPS, 16.2% formaldehyde) for 2 hours. After rinsing the gel  
602 three times with DEPC water the RNA was blotted onto a Nylon membrane (Hybond-N+, GE  
603 Healthcare, Amersham, UK) overnight using 20x SSC (3 M NaCl, 0.3 M sodium citrate). The  
604 membrane was exposed to UV light, rinsed with 6x SSC and again exposed to UV before pre-  
605 hybridizing for 2 hours at 55°C. The pre-hybridization solution contains 0.04% BSA, 0.04% PVP,  
606 0.04% Ficoll, 10 mM EDTA, 5x SSC, 0.2% SDS, 0.1% dextran and 0.1 mg ml<sup>-1</sup> salmon sperm DNA.  
607 Hybridization was performed overnight at 55°C using 2 pmol of *cl* and *lacl* specific 32P 5'-end  
608 labelled oligonucleotides, respectively. The probes were labelled using  $\gamma$ -32P-ATP and 10 U T7  
609 polynucleotide kinase (Thermo Fisher Scientific) for 1 hour at 37°C and column purified  
610 afterwards. The hybridization solution was identical to the pre-hybridization solution but  
611 without dextran and salmon sperm DNA. After rinsing two times with 0.5x SSC and washing 20  
612 minutes with 1x SSC + 0.1% SDS and 15 minutes with 0.5x SSC + 0.1% SDS, the membrane was  
613 dried for 30 minutes at room temperature. The blot was exposed up to several days, and the  
614 hybridization signals were detected using Phosphorimager from Molecular Dynamics. As  
615 reference signal for normalization the kanamycin resistant gene on the network plasmids was  
616 used.

617

#### 618 FACS

619 Flow cytometry was performed on a FACSCanto II analyzer (BD Biosciences, San Jose, CA).  
620 Sensitivity of the lasers was determined within the daily setup using BD FACS 7-color setup  
621 beads. For scatter detection the 488-nm laser was used: the forward scatter (FSC) detector was

622 set to 560 V, the side scatter (SSC) detector was set to 374 V. Both signals were collected  
623 through a 488/10-nm band-pass filter. Cells were plotted on a log scale with thresholding on  
624 FSC and SSC at 1,000. The green emission from the FITC-H channel was collected through a  
625 530/30-nm band-pass filter using 488-nm laser and the detector was set to 473 V. The  
626 fluorescence signal observed from a physiologically distinct subpopulation, gated on FSC-H and  
627 SSC-H, was biexponentially transformed. Cells were grown as for fluorescence population  
628 measurements, and after 6 hours of growth 15  $\mu$ l aliquots were frozen overnight adding 15  $\mu$ l  
629 30% glycerol in M9 buffer (1x M9 salts with Ca/Mg). After thawing, the samples were diluted in  
630 cold M9 buffer to reach an event rate of approximately 500 events/sec at medium flow rate.  
631 20,000 events were recorded using high throughput sampler (HTS). The mean fluorescence of  
632 approximately 10,000 gated cells similar in size and shape (FSC-H) and cellular complexity (SSC-  
633 H) was determined. Events were gated and values were extracted using FlowJo software  
634 (version 10.0.7, FlowJo LLC, Tree Star).

635

### 636 *Statistical analysis*

637 To analyse *yfp* fluorescence data measured to assess whether genomic location affected  
638 response to IPTG, we conducted an analysis of variance (ANOVA) at each concentration  
639 separately, with the measured fluorescence as the response factor and the genomic  
640 concentration as the fixed factor (Table S4). We followed up these with a series of Tukey's  
641 multiple comparisons tests performed separately for each IPTG concentration, to directly  
642 compare the expression levels between genomic locations (Fig. S9)

643

644 *Data availability*

645 DNA sequences of all GRNs cloned in this study can be found in IST Research Depository under

646 DOI 10.15479/AT:ISTA:8951.



647 ***Acknowledgements***

648 We thank J. Bollback, L. Hurst, M. Lagator, C. Nizak, O. Rivoire, M. Savageau, G. Tkacik and B.  
649 Vicozo for helpful discussions; A. Dolinar and A. Greshnova for technical assistance; T.  
650 Bollenbach for supplying the strain JW0336; C. Rusnac, and members of the Guet lab for  
651 comments. The research leading to these results has received funding from the People  
652 Programme (Marie Curie Actions) of the European Union's Seventh Framework Programme  
653 (FP7/2007-2013) under REA grant agreement n° 628377 (ANS) and an ANR-FWF grant (CCG).

654

655 ***Author contributions***

656 ANS and CCG designed research, ANS and KT constructed plasmids and strains, conducted  
657 experiments, and analyzed results, CCC assisted with plasmid and strain construction as well as  
658 data analysis, BK assisted with data analysis, ES performed Northern blot assays, TP developed  
659 model, ANS, KT and TP prepared the figures, ANS, CCG, KT, and TP wrote manuscript.

660

661 ***Competing interests***

662 No competing interests declared.

## 663 **References**

- 664 Apirion D, Miczak A. 1993. RNA processing in prokaryotic cells. *BioEssays* **15**:113–120.  
665 doi:10.1002/bies.950150207
- 666 Baba T, Ara T, Hasegawa M, Takai Y, Okumura Y, Baba M, Datsenko KA, Tomita M, Wanner BL, Mori H.  
667 2006. Construction of Escherichia coli K-12 in-frame, single-gene knockout mutants: the Keio  
668 collection. *Mol Syst Biol* **2**:2006.0008. doi:10.1038/msb4100050
- 669 Babu MM, Luscombe NM, Aravind L, Gerstein M, Teichmann SA. 2004. Structure and evolution of  
670 transcriptional regulatory networks. *Curr Opin Struct Biol* **14**:283–291.  
671 doi:10.1016/j.sbi.2004.05.004
- 672 Balaji S, Babu MM, Aravind L. 2007. Interplay between network structures, regulatory modes and  
673 sensing mechanisms of transcription factors in the transcriptional regulatory network of E. coli. *J*  
674 *Mol Biol* **372**:1108–1122. doi:10.1016/j.jmb.2007.06.084
- 675 Beckwith JR, Signer ER, Epstein W. 1966. Transposition of the Lac region of E. coli. *Cold Spring Harb Symp*  
676 *Quant Biol* **31**:393–401. doi:10.1101/sqb.1966.031.01.051
- 677 Berger M, Gerganova V, Berger P, Rapiteanu R, Lisicovas V, Dobrindt U. 2016. Genes on a Wire: The  
678 Nucleoid-Associated Protein HU Insulates Transcription Units in Escherichia coli. *Sci Rep*  
679 **6**:31512. doi:10.1038/srep31512
- 680 Block DHS, Hussein R, Liang LW, Lim HN. 2012. Regulatory consequences of gene translocation in  
681 bacteria. *Nucleic Acids Res* **40**:8979–8992. doi:10.1093/nar/gks694
- 682 Brinig MM, Cummings CA, Sanden GN, Stefanelli P, Lawrence A, Relman DA. 2006. Significant gene order  
683 and expression differences in Bordetella pertussis despite limited gene content variation. *J*  
684 *Bacteriol* **188**:2375–2382. doi:10.1128/JB.188.7.2375-2382.2006
- 685 Browning DF, Busby SJ. 2004. The regulation of bacterial transcription initiation. *Nat Rev Microbiol* **2**:57–  
686 65. doi:10.1038/nrmicro787
- 687 Browning DF, Busby SJW. 2016. Local and global regulation of transcription initiation in bacteria. *Nat Rev*  
688 *Microbiol* **14**:638–650. doi:10.1038/nrmicro.2016.103
- 689 Bryant JA, Sellars LE, Busby SJW, Lee DJ. 2014. Chromosome position effects on gene expression in  
690 Escherichia coli K-12. *Nucleic Acids Res* **42**:11383–11392. doi:10.1093/nar/gku828
- 691 Cambray G, Guimaraes JC, Mutalik VK, Lam C, Mai Q-A, Thimmaiah T, Carothers JM, Arkin AP, Endy D.  
692 2013. Measurement and modeling of intrinsic transcription terminators. *Nucleic Acids Res*  
693 **41**:5139–5148. doi:10.1093/nar/gkt163
- 694 Cardinale S, Arkin AP. 2012. Contextualizing context for synthetic biology - identifying causes of failure of  
695 synthetic biological systems. *Biotechnol J* **7**:856–866. doi:10.1002/biot.201200085
- 696 Chan LY, Kosuri S, Endy D. 2005. Refactoring bacteriophage T7. *Mol Syst Biol* **1**.  
697 doi:10.1038/msb4100025
- 698 Chen HD, Jewett MW, Groisman EA. 2012. An allele of an ancestral transcription factor dependent on a  
699 horizontally acquired gene product. *PLoS Genet* **8**:e1003060. doi:10.1371/journal.pgen.1003060
- 700 Cherepanov PP, Wackernagel W. 1995. Gene disruption in Escherichia coli: TcR and KmR cassettes with  
701 the option of Flp-catalyzed excision of the antibiotic-resistance determinant. *Gene* **158**:9–14.
- 702 Datsenko KA, Wanner BL. 2000. One-step inactivation of chromosomal genes in Escherichia coli K-12  
703 using PCR products. *Proc Natl Acad Sci U S A* **97**:6640–6645. doi:10.1073/pnas.120163297
- 704 Datta S, Costantino N, Court DL. 2006. A set of recombineering plasmids for gram-negative bacteria.  
705 *Gene* **379**:109–115. doi:10.1016/j.gene.2006.04.018
- 706 Díaz-Maldonado H, Gómez MJ, Moreno-Paz M, San Martín-Úriz P, Amils R, Parro V, López de Saro FJ.  
707 2015. Transposase interaction with the  $\beta$  sliding clamp: effects on insertion sequence  
708 proliferation and transposition rate. *Sci Rep* **5**:13329. doi:10.1038/srep13329

- 709 Douillard FP, Ribbera A, Xiao K, Ritari J, Rasinkangas P, Paulin L, Palva A, Hao Y, de Vos WM. 2016.  
710 Polymorphisms, Chromosomal Rearrangements, and Mutator Phenotype Development during  
711 Experimental Evolution of *Lactobacillus rhamnosus* GG. *Appl Environ Microbiol* **82**:3783–3792.  
712 doi:10.1128/AEM.00255-16
- 713 Dubnau D, Losick R. 2006. Bistability in bacteria. *Mol Microbiol* **61**:564–572. doi:10.1111/j.1365-  
714 2958.2006.05249.x
- 715 Garcia HG, Lee HJ, Boedicker JQ, Phillips R. 2011. Comparison and calibration of different reporters for  
716 quantitative analysis of gene expression. *Biophys J* **101**:535–544. doi:10.1016/j.bpj.2011.06.026
- 717 Georg J, Hess WR. 2011. cis-antisense RNA, another level of gene regulation in bacteria. *Microbiol Mol*  
718 *Biol Rev MMBR* **75**:286–300. doi:10.1128/MMBR.00032-10
- 719 Guet CC, Elowitz MB, Hsing W, Leibler S. 2002. Combinatorial synthesis of genetic networks. *Science*  
720 **296**:1466–1470. doi:10.1126/science.1067407
- 721 Haldimann A, Wanner BL. 2001. Conditional-replication, integration, excision, and retrieval plasmid-host  
722 systems for gene structure-function studies of bacteria. *J Bacteriol* **183**:6384–6393.  
723 doi:10.1128/JB.183.21.6384-6393.2001
- 724 Hudson RE, Bergthorsson U, Roth JR, Ochman H. 2002. Effect of Chromosome Location on Bacterial  
725 Mutation Rates. *Mol Biol Evol* **19**:85–92. doi:10.1093/oxfordjournals.molbev.a003986
- 726 Iglér C, Lagator M, Tkačik G, Bollback JP, Guet CC. 2018. Evolutionary potential of transcription factors  
727 for gene regulatory rewiring. *Nat Ecol Evol* **2**:1633–1643. doi:10.1038/s41559-018-0651-y
- 728 Isalan M, Lemerle C, Michalodimitrakis K, Horn C, Beltrao P, Raineri E, Garriga-Canut M, Serrano L. 2008.  
729 Evolvability and hierarchy in rewired bacterial gene networks. *Nature* **452**:840–845.  
730 doi:10.1038/nature06847
- 731 Jacob F, Monod J. 1961. On the Regulation of Gene Activity. *Cold Spring Harb Symp Quant Biol* **26**:193–  
732 211. doi:10.1101/SQB.1961.026.01.024
- 733 Junier I. 2014. Conserved patterns in bacterial genomes: a conundrum physically tailored by  
734 evolutionary tinkering. *Comput Biol Chem* **53 Pt A**:125–133.  
735 doi:10.1016/j.compbiolchem.2014.08.017
- 736 Junier I, Rivoire O. 2016. Conserved Units of Co-Expression in Bacterial Genomes: An Evolutionary Insight  
737 into Transcriptional Regulation. *PLoS One* **11**:e0155740. doi:10.1371/journal.pone.0155740
- 738 Junier I, Unal EB, Yus E, Lloréns-Rico V, Serrano L. 2016. Insights into the Mechanisms of Basal  
739 Coordination of Transcription Using a Genome-Reduced Bacterium. *Cell Syst* **2**:391–401.  
740 doi:10.1016/j.cels.2016.04.015
- 741 Keiler KC, Waller PR, Sauer RT. 1996. Role of a peptide tagging system in degradation of proteins  
742 synthesized from damaged messenger RNA. *Science* **271**:990–993.
- 743 Kuhlman TE, Cox EC. 2012. Gene location and DNA density determine transcription factor distributions  
744 in *Escherichia coli*. *Mol Syst Biol* **8**:610. doi:10.1038/msb.2012.42
- 745 Kwok R. 2010. Five hard truths for synthetic biology. *Nature* **463**:288–290. doi:10.1038/463288a
- 746 Lagomarsino MC, Espéli O, Junier I. 2015. From structure to function of bacterial chromosomes:  
747 Evolutionary perspectives and ideas for new experiments. *FEBS Lett* **589**:2996–3004.  
748 doi:10.1016/j.febslet.2015.07.002
- 749 Lawrence JG, Roth JR. 1996. Selfish operons: horizontal transfer may drive the evolution of gene  
750 clusters. *Genetics* **143**:1843–1860.
- 751 Lim HN, Lee Y, Hussein R. 2011. Fundamental relationship between operon organization and gene  
752 expression. *Proc Natl Acad Sci U S A* **108**:10626–10631. doi:10.1073/pnas.1105692108
- 753 Liu LF, Wang JC. 1987. Supercoiling of the DNA template during transcription. *Proc Natl Acad Sci U S A*  
754 **84**:7024–7027.

- 755 Livak KJ, Schmittgen TD. 2001. Analysis of relative gene expression data using real-time quantitative PCR  
756 and the 2(-Delta Delta C(T)) Method. *Methods San Diego Calif* **25**:402–408.  
757 doi:10.1006/meth.2001.1262
- 758 Lutz R, Bujard H. 1997. Independent and tight regulation of transcriptional units in Escherichia coli via  
759 the LacR/O, the TetR/O and AraC/I1-I2 regulatory elements. *Nucleic Acids Res* **25**:1203–1210.
- 760 Mangan S, Zaslaver A, Alon U. 2003. The Coherent Feedforward Loop Serves as a Sign-sensitive Delay  
761 Element in Transcription Networks. *J Mol Biol* **334**:197–204. doi:10.1016/j.jmb.2003.09.049
- 762 Meyer S, Reverchon S, Nasser W, Muskhelishvili G. 2018. Chromosomal organization of transcription: in  
763 a nutshell. *Curr Genet* **64**:555–565. doi:10.1007/s00294-017-0785-5
- 764 Mirkin EV, Castro Roa D, Nudler E, Mirkin SM. 2006. Transcription regulatory elements are punctuation  
765 marks for DNA replication. *Proc Natl Acad Sci U S A* **103**:7276–7281.  
766 doi:10.1073/pnas.0601127103
- 767 Mukherji S, van Oudenaarden A. 2009. Synthetic biology: Understanding biological design from synthetic  
768 circuits. *Nat Rev Genet* **10**:859–871. doi:10.1038/nrg2697
- 769 Narula J, Devi SN, Fujita M, Igoshin OA. 2012. Ultrasensitivity of the Bacillus subtilis sporulation decision.  
770 *Proc Natl Acad Sci U S A* **109**:E3513–3522. doi:10.1073/pnas.1213974109
- 771 Nocedal I, Mancera E, Johnson AD. 2017. Gene regulatory network plasticity predates a switch in  
772 function of a conserved transcription regulator. *eLife* **6**. doi:10.7554/eLife.23250
- 773 Orosz A, Boros I, Venetianer P. 1991. Analysis of the complex transcription termination region of the  
774 Escherichia coli rrnB gene. *Eur J Biochem* **201**:653–659.
- 775 Palmer AC, Egan JB, Shearwin KE. 2011. Transcriptional interference by RNA polymerase pausing and  
776 dislodgement of transcription factors. *Transcription* **2**:9–14. doi:10.4161/trns.2.1.13511
- 777 Periwai V, Scaria V. 2015. Insights into structural variations and genome rearrangements in prokaryotic  
778 genomes. *Bioinforma Oxf Engl* **31**:1–9. doi:10.1093/bioinformatics/btu600
- 779 Pleška M, Qian L, Okura R, Bergmiller T, Wakamoto Y, Kussell E, Guet CC. 2016. Bacterial Autoimmunity  
780 Due to a Restriction-Modification System. *Curr Biol CB* **26**:404–409.  
781 doi:10.1016/j.cub.2015.12.041
- 782 Prud'homme B, Gompel N, Rokas A, Kassner VA, Williams TM, Yeh S-D, True JR, Carroll SB. 2006.  
783 Repeated morphological evolution through cis-regulatory changes in a pleiotropic gene. *Nature*  
784 **440**:1050–1053. doi:10.1038/nature04597
- 785 Ptashne M. 2004. A genetic switch: phage lambda revisited, 3rd ed. ed. Cold Spring Harbor, N.Y: Cold  
786 Spring Harbor Laboratory Press.
- 787 Radeck J, Kraft K, Bartels J, Cikovic T, Dürr F, Emenegger J, Kelterborn S, Sauer C, Fritz G, Gebhard S,  
788 Mascher T. 2013. The Bacillus BioBrick Box: generation and evaluation of essential genetic  
789 building blocks for standardized work with Bacillus subtilis. *J Biol Eng* **7**:29. doi:10.1186/1754-  
790 1611-7-29
- 791 Raeside C, Gaffé J, Deatherage DE, Tenaillon O, Briska AM, Ptashkin RN, Cruveiller S, Médigue C, Lenski  
792 RE, Barrick JE, Schneider D. 2014. Large chromosomal rearrangements during a long-term  
793 evolution experiment with Escherichia coli. *mBio* **5**:e01377-01314. doi:10.1128/mBio.01377-14
- 794 Reynolds R, Bermúdez-Cruz RM, Chamberlin MJ. 1992. Parameters affecting transcription termination  
795 by Escherichia coli RNA polymerase. I. Analysis of 13 rho-independent terminators. *J Mol Biol*  
796 **224**:31–51.
- 797 Riordan, J. 2003. Introduction to Combinatorial Analysis. Dover Books on Mathematics.
- 798 Saito T, Chibazakura T, Takahashi K, Yoshikawa H, Sekine Y. 2010. Measurements of transposition  
799 frequency of insertion sequence IS1 by GFP hop-on assay. *J Gen Appl Microbiol* **56**:187–192.
- 800 Sambrook J, Russell DW. 2001. Molecular cloning: a laboratory manual, 3rd ed. ed. Cold Spring Harbor,  
801 N.Y: Cold Spring Harbor Laboratory Press.

- 802 San Millan A, Depardieu F, Godreuil S, Courvalin P. 2009. VanB-Type Enterococcus faecium Clinical  
803 Isolate Successively Inducibly Resistant to, Dependent on, and Constitutively Resistant to  
804 Vancomycin. *Antimicrob Agents Chemother* **53**:1974–1982. doi:10.1128/AAC.00034-09
- 805 Scholz SA, Diao R, Wolfe MB, Fivenson EM, Lin XN, Freddolino PL. 2019. High-Resolution Mapping of the  
806 Escherichia coli Chromosome Reveals Positions of High and Low Transcription. *Cell Syst* **8**:212-  
807 225.e9. doi:10.1016/j.cels.2019.02.004
- 808 Schuster P, Fontana W, Stadler PF, Hofacker IL. 1994. From sequences to shapes and back: a case study  
809 in RNA secondary structures. *Proc Biol Sci* **255**:279–284. doi:10.1098/rspb.1994.0040
- 810 Shearwin KE, Callen BP, Egan JB. 2005. Transcriptional interference – a crash course. *Trends Genet*  
811 **21**:339–345. doi:10.1016/j.tig.2005.04.009
- 812 Shubin N, Tabin C, Carroll S. 2009. Deep homology and the origins of evolutionary novelty. *Nature*.  
813 doi:10.1038/nature07891
- 814 Smits WK, Eschevins CC, Susanna KA, Bron S, Kuipers OP, Hamoen LW. 2005. Stripping Bacillus: ComK  
815 auto-stimulation is responsible for the bistable response in competence development. *Mol*  
816 *Microbiol* **56**:604–614. doi:10.1111/j.1365-2958.2005.04488.x
- 817 Sobetzko P. 2016. Transcription-coupled DNA supercoiling dictates the chromosomal arrangement of  
818 bacterial genes. *Nucleic Acids Res* **44**:1514–1524. doi:10.1093/nar/gkw007
- 819 Sobetzko P, Travers A, Muskhelishvili G. 2012. Gene order and chromosome dynamics coordinate  
820 spatiotemporal gene expression during the bacterial growth cycle. *Proc Natl Acad Sci U S A*  
821 **109**:E42-50. doi:10.1073/pnas.1108229109
- 822 Sousa A, Bourgard C, Wahl LM, Gordo I. 2013. Rates of transposition in Escherichia coli. *Biol Lett*  
823 **9**:20130838. doi:10.1098/rsbl.2013.0838
- 824 Sousa C, de Lorenzo V, Cebolla A. 1997. Modulation of gene expression through chromosomal  
825 positioning in Escherichia coli. *Microbiol Read Engl* **143 ( Pt 6)**:2071–2078.  
826 doi:10.1099/00221287-143-6-2071
- 827 Steinrueck M, Guet CC. 2017. Complex chromosomal neighborhood effects determine the adaptive  
828 potential of a gene under selection. *eLife* **6**. doi:10.7554/eLife.25100
- 829 Stern DL, Orgogozo V. 2008. The loci of evolution: how predictable is genetic evolution? *Evolution*  
830 **62**:2155–2177. doi:10.1111/j.1558-5646.2008.00450.x
- 831 Szeberényi J, Roy MK, Vaidya HC, Apirion D. 1984. 7S RNA, containing 5S ribosomal RNA and the  
832 termination stem, is a specific substrate for the two RNA processing enzymes RNase III and  
833 RNase E. *Biochemistry (Mosc)* **23**:2952–2957.
- 834 Tomanek I, Grah R, Lagator M, Andersson AMC, Bollback JP, Tkačik G, Guet CC. 2020. Gene amplification  
835 as a form of population-level gene expression regulation. *Nat Ecol Evol in revision*.
- 836 Tomasek, K., Bergmiller, T., Guet, C. C. 2018. Lack of cations in flow cytometry buffers affect  
837 fluorescence signals by reducing membrane stability and viability of Escherichia coli strains. *J*  
838 *Biotechnol* **268**:40–52.
- 839 Vora T, Hottes AK, Tavazoie S. 2009. Protein occupancy landscape of a bacterial genome. *Mol Cell*  
840 **35**:247–253. doi:10.1016/j.molcel.2009.06.035
- 841 Wagner GP, Lynch VJ. 2010. Evolutionary novelties. *Curr Biol* **20**:R48–R52.  
842 doi:10.1016/j.cub.2009.11.010
- 843 Weigand MR, Peng Y, Loparev V, Batra D, Bowden KE, Burroughs M, Cassidy PK, Davis JK, Johnson T,  
844 Juieng P, Knipe K, Mathis MH, Pruitt AM, Rowe L, Sheth M, Tondella ML, Williams MM. 2017.  
845 The History of Bordetella pertussis Genome Evolution Includes Structural Rearrangement. *J*  
846 *Bacteriol* **199**. doi:10.1128/JB.00806-16
- 847 Wolf DM, Arkin AP. 2003. Motifs, modules and games in bacteria. *Curr Opin Microbiol* **6**:125–134.
- 848 Wray GA. 2007. The evolutionary significance of cis-regulatory mutations. *Nat Rev Genet* **8**:206–216.  
849 doi:10.1038/nrg2063

- 850 Wu H-Y, Fang M. 2003. DNA supercoiling and transcription control: a model from the study of  
851 suppression of the leu-500 mutation in *Salmonella typhimurium* topA- strains. *Prog Nucleic Acid*  
852 *Res Mol Biol* **73**:43–68.
- 853 Wu K, Rao CV. 2010. The role of configuration and coupling in autoregulatory gene circuits. *Mol*  
854 *Microbiol* **75**:513–527. doi:10.1111/j.1365-2958.2009.07011.x
- 855 Yeung E, Dy AJ, Martin KB, Ng AH, Del Vecchio D, Beck JL, Collins JJ, Murray RM. 2017. Biophysical  
856 Constraints Arising from Compositional Context in Synthetic Gene Networks. *Cell Syst* **5**:11-  
857 24.e12. doi:10.1016/j.cels.2017.06.001
- 858 Zipser D. 1969. Polar Mutations and Operon Function. *Nature* **221**:21–25. doi:10.1038/221021a0  
859



**Table S1. Strains used in this study.**

| Name                           | Genotype <sup>a</sup>                                                                                                                                                                                                                                                                           | Source                |
|--------------------------------|-------------------------------------------------------------------------------------------------------------------------------------------------------------------------------------------------------------------------------------------------------------------------------------------------|-----------------------|
| DH5α                           | F <sup>-</sup> , Φ80 <i>lacZ</i> Δ <i>M15</i> , Δ( <i>lacZYA-argF</i> ), U169, <i>recA1</i> , <i>endA1</i> , <i>hsdR17</i> ( <i>rK</i> <sup>-</sup> , <i>mK</i> <sup>+</sup> ), <i>phoA supE44</i> , <i>thi-1</i> , <i>gyrA96</i> , <i>relA1</i> , λ <sup>-</sup>                               | Laboratory stock      |
| DH5α λ <i>pir</i> <sup>+</sup> | F <sup>-</sup> , Φ80 <i>lacZ</i> Δ <i>M15</i> , Δ( <i>lacZYA-argF</i> ), U169, <i>recA1</i> , <i>endA1</i> , <i>hsdR17</i> ( <i>rK</i> <sup>-</sup> , <i>mK</i> <sup>+</sup> ), <i>phoA supE44</i> , <i>thi-1</i> , <i>gyrA96</i> , <i>relA1</i> , λ <i>pir</i> <sup>+</sup>                    | Laboratory stock      |
| HG105                          | MG1655 Δ <i>lacZYA</i> Δ <i>lacI</i>                                                                                                                                                                                                                                                            | (Garcia et al., 2011) |
| JW0336                         | F <sup>-</sup> , Δ( <i>araD-araB</i> )567, Δ <i>lacZ</i> 4787:: <i>rrnB-3</i> , Δ <i>lacI</i> 785:: <i>kan</i> , λ <sup>-</sup> , <i>rph-1</i> , Δ( <i>rhaD-rhaB</i> )568, <i>hsdR514</i>                                                                                                       | (Baba et al., 2006)   |
| MG1655                         | F <sup>-</sup> , λ <sup>-</sup> , <i>ilvG</i> <sup>-</sup> , <i>rfb-50</i> , <i>rph-1</i>                                                                                                                                                                                                       | Laboratory stock      |
| TB201                          | MG1655 att <sub>P21</sub> ::P <sub>R</sub> - <i>yfp</i>                                                                                                                                                                                                                                         | (Pleška et al., 2016) |
| Frag1B                         | F <sup>-</sup> , <i>lacZ</i> 82(Am), λ <sup>-</sup> , <i>rha-4</i> , <i>thiE</i> , <i>gal-33</i> , P <sub>N25</sub> / <i>tetR placI<sup>q</sup>/lacI Sp<sup>R</sup></i>                                                                                                                         | Laboratory stock      |
| Frag1D                         | F <sup>-</sup> , <i>lacZ</i> 82(Am), λ <sup>-</sup> , <i>rha-4</i> , <i>thiE</i> , <i>gal-33</i> , P <sub>N25</sub> / <i>tetR placI<sup>q</sup>/lacI Sp<sup>R</sup></i> , Δ <i>recA</i>                                                                                                         | Laboratory stock      |
| ASE023                         | MG1655 att <sub>P21</sub> ::P <sub>R</sub> - <i>yfp</i> Δ <i>lacI</i> 785 Δ <i>lacZ</i> 4787:: <i>rrnB-3</i>                                                                                                                                                                                    | This study            |
| ASE030                         | MG1655 att <sub>P21</sub> ::P <sub>R</sub> - <i>yfp</i> Δ <i>lacI</i> 785 Δ <i>lacZ</i> 4787:: <i>rrnB-3</i> Δ <i>recA</i> att <sub>HK022</sub> ::P <sub>LacO1</sub> - <i>lacI</i> att <sub>λ</sub> ::P <sub>LacO1</sub> - <i>tetR</i> 3939old::P <sub>tetO1</sub> - <i>cl</i> Cam <sup>R</sup> | This study            |
| ASE031                         | MG1655 att <sub>P21</sub> ::P <sub>R</sub> - <i>yfp</i> Δ <i>lacI</i> 785 Δ <i>lacZ</i> 4787:: <i>rrnB-3</i> att <sub>HK022</sub> ::P <sub>LtetO1</sub> - <i>cl</i> -P <sub>LacO1</sub> - <i>tetR</i> -P <sub>LacO1</sub> - <i>lacI</i> (CTL)                                                   | This study            |
| ASE032                         | MG1655 att <sub>P21</sub> ::P <sub>R</sub> - <i>yfp</i> Δ <i>lacI</i> 785 Δ <i>lacZ</i> 4787:: <i>rrnB-3</i> att <sub>HK022</sub> ::P <sub>LacO1</sub> - <i>lacI</i> -P <sub>LtetO1</sub> - <i>cl</i> -P <sub>LacO1</sub> - <i>tetR</i> (LCT)                                                   | This study            |
| ASE033                         | MG1655 att <sub>P21</sub> ::P <sub>R</sub> - <i>yfp</i> Δ <i>lacI</i> 785 Δ <i>lacZ</i> 4787:: <i>rrnB-3</i> att <sub>HK022</sub> ::P <sub>LacO1</sub> - <i>tetR</i> -P <sub>LacO1</sub> - <i>lacI</i> -P <sub>LtetO1</sub> - <i>cl</i> (TLC)                                                   | This study            |
| ASE039                         | MG1655 Δ <i>lacZYA</i> Δ <i>lacI</i> att <sub>λ</sub> ::P <sub>lac-131-410</sub> - <i>yfp</i>                                                                                                                                                                                                   | This study            |
| ASE041                         | MG1655 P <i>lac</i> ::Cam <sup>R</sup> -FRT                                                                                                                                                                                                                                                     | This study            |
| ASE046                         | MG1655 Δ <i>lacZYA</i> Δ <i>lacI</i> att <sub>λ</sub> ::P <sub>lac-131-410</sub> - <i>yfp fhlC::lacI</i>                                                                                                                                                                                        | This study            |
| ASE047                         | MG1655 Δ <i>lacZYA</i> Δ <i>lacI</i> att <sub>λ</sub> ::P <sub>lac-131-410</sub> - <i>yfp yeaH::lacI</i>                                                                                                                                                                                        | This study            |
| ASE048                         | MG1655 Δ <i>lacZYA</i> Δ <i>lacI</i> att <sub>λ</sub> ::P <sub>lac-131-410</sub> - <i>yfp asnT::lacI</i>                                                                                                                                                                                        | This study            |
| KT131                          | MG1655 att <sub>P21</sub> ::P <sub>R</sub> - <i>yfp</i> Δ <i>lacI</i> 785 Δ <i>lacZ</i> 4787:: <i>rrnB-3</i> Δ <i>recA</i>                                                                                                                                                                      | This study            |
| KT132                          | MG1655 Δ <i>lacI</i> 785 Δ <i>lacZ</i> 4787:: <i>rrnB-3</i> Δ <i>recA</i>                                                                                                                                                                                                                       | This study            |

<sup>a</sup> Amp – ampicillin resistance, Kan – kanamycin resistance, Sp – spectinomycin resistance, Cam – chloramphenicol resistance

**Table S2. Oligonucleotides used in this study.**

| Name  | Sequence (5'-3') <sup>a</sup>                                              | Use                                                                                  |
|-------|----------------------------------------------------------------------------|--------------------------------------------------------------------------------------|
| AS096 | GTACCTGCAGGACGTCAGTACTGCCACGGAGGCATACGCAA<br>CCGCCTCTCCC                   | <i>mCherry</i> up                                                                    |
| AS097 | GTACCCCGGGAGATCTGTCGACGCCTAGGTGGCCTACTAGTAT<br>ATAAACGCAG                  | <i>mCherry</i> down                                                                  |
| AS098 | ATTCGCCACGGAGGCACCTTTCGTCTTCACC                                            | Fragment 1F, up <sup>b</sup>                                                         |
| AS099 | GACAGCCTGAATGGCTCTAGGGCGGCGGATTTG                                          | Fragment 1F, down <sup>b</sup>                                                       |
| AS100 | ATTCGCCATTCAGGCACCTTTCGTCTTCACC                                            | Fragment 2F, up <sup>b</sup>                                                         |
| AS101 | GACAGCCTCACTGGCTCTAGGGCGGCGGATTTG                                          | Fragment 2F, down <sup>b</sup>                                                       |
| AS102 | ATTCGCCAGTGAGGCACCTTTCGTCTTCACC                                            | Fragment 3F, up <sup>b</sup>                                                         |
| AS103 | GACAGCCTAGGTGGCTCTAGGGCGGCGGATTTG                                          | Fragment 3F, down <sup>b</sup>                                                       |
| AS104 | TTCACCTCGAGAATTGTGAGC                                                      | P <sub>LlacO1</sub> - <i>lacI/tetR</i> , up                                          |
| AS105 | GACATCTAGATTAAGCTGCTAAAGCGTAG                                              | P <sub>LlacO1</sub> - <i>lacI/tetR</i> , down                                        |
| AS106 | TTCACCTCGAGTCCCTATCAG                                                      | P <sub>LtetO1</sub> - <i>cl</i> , up                                                 |
| AS107 | GGATCCTCTAGATCAAGCTGC                                                      | P <sub>LtetO1</sub> - <i>cl</i> , down                                               |
| AS129 | ATTCGCCACGGAGGCTCTAGGGCGGCGGATTTG                                          | Fragment 1R, up <sup>b</sup>                                                         |
| AS130 | GACAGCCTGAATGGCTCCTTTCGTCTTCACC                                            | Fragment 1R, down <sup>b</sup>                                                       |
| AS131 | ATTCGCCATTCAGGCTCTAGGGCGGCGGATTTG                                          | Fragment 2R, up <sup>b</sup>                                                         |
| AS132 | GACAGCCTCACTGGCTCCTTTCGTCTTCACC                                            | Fragment 2R, down <sup>b</sup>                                                       |
| AS133 | ATTCGCCAGTGAGGCTCTAGGGCGGCGGATTTG                                          | Fragment 3R, up <sup>b</sup>                                                         |
| AS134 | GACAGCCTAGGTGGCTCCTTTCGTCTTCACC                                            | Fragment 3R, down <sup>b</sup>                                                       |
| AS135 | GCATGAATTCGGCTGTTCTGGTGTGCTAG                                              | pZS*2 backbone, up                                                                   |
| AS136 | GTC AAGTACTCTCGAGGTGAAGACGAAAGG                                            | pZS*2 backbone, down                                                                 |
| AS142 | CTAGAAAAGCCTCCGACCGGAGGCTTTTGT                                             | <i>TtonB</i> , fwd                                                                   |
| AS143 | CTAGACAAAAGCCTCCGGTCGGAGGCTTTTT                                            | <i>TtonB</i> , rev                                                                   |
| AS144 | CTAGATGGCGCGTTACCTGGTAGCGGCCATTTTGT                                        | <i>Tcrp</i> , fwd                                                                    |
| AS145 | CTAGAAAACAAAATGGCGCGCTACCAGGTAACGCGCCAT                                    | <i>Tcrp</i> , rev                                                                    |
| AS147 | GACAGCCTCACTGGCACCTCTAGAAAACAAAATGGC                                       | Fragment 2F- <i>Tcrp</i> ,<br>down <sup>b</sup>                                      |
| AS153 | GACAGCCTCACTGGCACCTCTAGACAAAAGCCTCCG                                       | Fragment 2F- <i>TtonB</i> ,<br>down <sup>b</sup>                                     |
| AS159 | TCCTCCTTAGTTCCTATTCC                                                       | Integration of P <sub>tetO1</sub> - <i>cl</i><br>into <i>fold</i> , <i>cam</i> up    |
| AS160 | ACTTCGGAATAGGAACTAAGGAGGAAAATAGGCGTATCACGA<br>GGC                          | Integration of P <sub>tetO1</sub> - <i>cl</i><br>into <i>fold</i> , <i>cl</i> up     |
| AS161 | CATCAATAATAAGGCTTTATGCTAGATGCATTCCGCTTTGCGAC<br>TCAACCACTAGCAACACCAGAACAGC | Integration of networks<br>into att <sub>HK022</sub> , up                            |
| AS167 | CATCCAGAGTCTTCGGGTCAGGGTTAAATTCACGGTCGGTGCA<br>CTTTAGGGCTTACCCGTCTTACTGTCC | Integration of networks<br>into att <sub>HK022</sub> , down                          |
| AS168 | CACCGTCGCTGAGACTGAAAGCTTCATTTTTCGTCCATGATGGC<br>GTTGTAGAAAAGTGCCACCTGCATCG | Integration of P <sub>LtetO1</sub> - <i>cl</i><br>into <i>fold</i> , <i>cam</i> down |



|       |                                                                                                |                                                                            |
|-------|------------------------------------------------------------------------------------------------|----------------------------------------------------------------------------|
| AS170 | TTCTTAAATTATCTTAATCCTTAGACAAGGAAATAAATCAGTTCC<br>AGATTTAGATCAAGCTGCTAAAGCG                     | Integration of P <sub>Ltet01-cl</sub><br>into <i>fold</i> , <i>cl</i> down |
| AS171 | CATCCCTATCAGTGATAGAGCTACGGAGCACATCAGCAGGAC<br>GC                                               | A-11C and T-7G<br>substitution, fwd                                        |
| AS172 | GCGTCCTGCTGATGTGCTCCGTAGCTCTATCACTGATAGGGAT<br>G                                               | A-11C and T-7G<br>substitution, rev                                        |
| AS195 | GACAGCCTAGGTGGCATTAAAGAGGAGAAAGGTACC                                                           | Promoterless <i>yfp</i> , fwd                                              |
| AS198 | ATTAGCATGCTAATAGGTATCCTATGATTA                                                                 | wt P <sub>lac</sub> , fwd                                                  |
| AS199 | TAATGAATTCTCCTTCTCGATCCGAGACGA                                                                 | wt P <sub>lac</sub> , rev                                                  |
| AS206 | CATTAATGCAGCTGGCACGACAGGTTTCCCGACTGGAAAGCGG<br>GCAGTGACATATGAATATCCTCCTTAG                     | Integration of Cam <sup>R</sup><br>into P <sub>lac</sub> , fwd             |
| AS207 | AAGCCTGGGGTGCCTAATGAGTGAGCTAACTCACATTAATTGC<br>GTTGCGCACAGCTGCAGGCATGCAAGC                     | Integration of Cam <sup>R</sup><br>into P <sub>lac</sub> , rev             |
| AS221 | TAAACTATCAGCCAGGTCATTATCGCCTGGCTGATTTTTAGCT<br>TACTGTCAACATCGAATGGCGCAAAA                      | Integration of <i>lacI</i> into<br><i>yeaH</i> locus, fwd                  |
| AS222 | TCATATTTAAAGCGATTGTAAGCTAATGTATGTAATAAATGAGA<br>TAATTTACAGCTGCAGGCATGCAAGC                     | Integration of <i>lacI</i> into<br><i>yeaH</i> locus, rev                  |
| AS225 | CATCTTAAGCGCCCTCGACCTTTATGGTTGAGGGCGTTTTGCTA<br>TGAACGCAACATCGAATGGCGCAAAA                     | Integration of <i>lacI</i> into<br><i>asnT</i> locus, fwd                  |
| AS226 | GAGACTACTGAATAACTCAAGTTTTATAATCGAGGGGAAAATG<br>GTGATGGACAGCTGCAGGCATGCAAGC                     | Integration of <i>lacI</i> into<br><i>asnT</i> locus, rev                  |
| AS229 | GCAACATTCCAGCAGCGGTAACGACGTACCGCTGCTTTTTTTTG<br>CCCCAACACATCGAATGGCGCAAAA                      | Integration of <i>lacI</i> into<br><i>flhC</i> locus, fwd                  |
| AS230 | TCCACTGTTGACCATGACAGGATGTTACAGTCGTCAGGCGTTAAC<br>GCGCGAACAGCTGCAGGCATGCAAGC                    | Integration of <i>lacI</i> into<br><i>flhC</i> locus, rev                  |
| AS267 | TTGTCGGCGGTGGTGATGTC                                                                           | qPCR <i>cysG</i> , up                                                      |
| AS268 | ATGCGGTGAACTGTGGAATAAACG                                                                       | qPCR <i>cysG</i> , down                                                    |
| AS271 | CGTGACATCAGACATTGTG                                                                            | <i>yeaH-lacI</i> junction, fwd                                             |
| AS272 | CGTTTTCGCAGAAACGTGGC                                                                           | <i>lacI</i> junctions, rev                                                 |
| AS277 | GCCTGCAGCTTATGTCAACC                                                                           | <i>flhC-lacI</i> junction, fwd                                             |
| AS280 | GTCACTGACCTTAGTTGAAC                                                                           | <i>asnT-lacI</i> junction, fwd                                             |
| AS282 | GACAGCCTCACTGGCTCTAGGGAAGAGTTTGT                                                               | Fragment 2F-T1T2,<br>down <sup>b</sup>                                     |
| AS283 | TCGACTCTAGATGGCGGTTACCTGGTAGCGGCCATTTTGTTT<br>TCTAGAGGTGCCAGTGAGGCACCTTTCGTCTTCACCTCGAGG       | <i>Tcrp</i> , fwd                                                          |
| AS284 | TCGACCTCGAGGTGAAGACGAAAGGTGCCTCACTGGCACCTCT<br>AGAAAACAAAATGGCGCGCTACCAGGTAACGCGCCATCTAGA<br>G | <i>Tcrp</i> , rev                                                          |
| AS285 | TCGACTCTAGAAAAAGCCTCCGACCGGAGGCTTTTGCTAGAG<br>GTGCCAGTGAGGCACCTTTCGTCTTCACCTCGAGG              | <i>TtonB</i> , fwd                                                         |
| AS286 | TCGACCTCGAGGTGAAGACGAAAGGTGCCTCACTGGCACCTCT<br>AGACAAAAGCCTCCGGTCGGAGGCTTTTTCTAGAG             | <i>TtonB</i> , rev                                                         |
| KTp38 | TCAGTGATAGAGATTGACATCCCT                                                                       | RNA purity, <i>cl</i> up                                                   |

|             |                                                                                  |                                          |
|-------------|----------------------------------------------------------------------------------|------------------------------------------|
| KTp39       | <b>CCCCACAACGGAACA</b> ACTCT                                                     | RNA purity, <i>cl</i> down               |
| KTp45       | GACAG <u>CCCT</u> CACT <u>GGCT</u> CTTAAGCTGCTAAAGCGTAG                          | Fragment 2 without T1, down <sup>b</sup> |
| KTp46       | ATTC <u>GCC</u> ATTCAG <u>GCT</u> CTTAAGCTGCTAAAGCGTAG                           | Fragment 2R without T1, up <sup>b</sup>  |
| KTp65       | <b>GCTGTTGAGCCAGGTGATTT</b>                                                      | qPCR <i>cl</i> , up                      |
| KTp66       | <b>GGGATCATTGGGTACTGTGG</b>                                                      | qPCR <i>cl</i> , down                    |
| KTp67       | <b>AATACGCAAACCGCCTCTC</b>                                                       | qPCR <i>lacI</i> , up                    |
| KTp68       | <b>CAGTCGGGAAACCTGTCGT</b>                                                       | qPCR <i>lacI</i> , down                  |
| KTp71       | <b>GTTGTCACTGAAGCGGGAAG</b>                                                      | qPCR <i>kanR</i> , up                    |
| KTp72       | <b>GCAAGGTGAGATGACAGGAGA</b>                                                     | qPCR <i>kanR</i> , down                  |
| KTp73       | <b>ACTCATCACCCCAAGTCTG</b>                                                       | Northern blot, <i>cl</i> probe 1         |
| KTp74       | <b>GGATCATTGGGTACTGTGGG</b>                                                      | Northern blot, <i>cl</i> probe 2         |
| KTp75       | <b>CCTGACTGCCCCATCCCC</b>                                                        | Northern blot, <i>cl</i> probe 3         |
| KTp76       | <b>CTCGTCCTGCAGTTCATTCA</b>                                                      | Northern blot, <i>kanR</i> probe 1       |
| KTp77       | <b>GCCAACGCTATGTCCTG</b>                                                         | Northern blot, <i>kanR</i> probe 2       |
| KTp90       | AT <u>GGATCCT</u> ATTAAGCTGCTAAAGC                                               | $P_{LacO1}$ - <i>tetR/lacI</i> , down    |
| KTp91       | AT <u>G</u> CAT <u>GCT</u> CGAGAATTGTGAGC                                        | $P_{LacO1}$ - <i>tetR/lacI</i> , up      |
| KTp93       | <b>CGGTTTGCGTATTGGGCG</b>                                                        | Northern blot, <i>lacI</i> probe 1       |
| KTp94       | <b>AGAAGATTGTGCACCGCC</b>                                                        | Northern blot, <i>lacI</i> probe 2       |
| 5'_rec<br>A | TGACTATCCGGTATTACCCGGCATGACAGGAGTAAAAAT <b>GGG</b><br><b>GATCCGTCGACCTGCAGTT</b> | <i>recA</i> deletion, up                 |
| 3'_rec<br>A | AAGGGCCGCAGATGCGACCCTTGTGTATCAAACAAGACGATGT<br><b>AGGCTGGAGCTGCTTC</b>           | <i>recA</i> deletion, down               |

<sup>a</sup> Restriction sites are underlined; sequences of overhangs produced after restriction with BglI are italicized, annealing sequences are shown in bold.

<sup>b</sup> Fragment number refers to gene position in the three gene array; F stands for “forward” orientation (opposite to the orientation of the kanamycin cassette), R for “reverse” orientation.

**Table S3. Plasmids used in this study.**

| Name   | Description <sup>a</sup>                                                                                                                                       | Primers and enzymes used for cloning                 | Source     |
|--------|----------------------------------------------------------------------------------------------------------------------------------------------------------------|------------------------------------------------------|------------|
| pAS014 | <i>pSC101* ori</i> , Amp <sup>R</sup> , P <sub>LlacO1</sub> - <i>tetR</i> (T)                                                                                  | AS104/AS105;<br>XhoI+XbaI                            | This study |
| pAS015 | <i>pSC101* ori</i> , Amp <sup>R</sup> , P <sub>LlacO1</sub> - <i>lacI</i> (L)                                                                                  | AS104/AS105;<br>XhoI+XbaI                            | This study |
| pAS016 | <i>pSC101* ori</i> , Amp <sup>R</sup> , P <sub>LtetO1</sub> - <i>Cl</i> (C)                                                                                    | AS106/AS107;<br>XhoI+XbaI                            | This study |
| pAS017 | <i>R6K ori</i> , Kan <sup>R</sup> , <i>attP<sub>λ</sub></i> , P <sub>lac</sub> - <i>mCherry</i>                                                                | AS096/AS097;<br>PstI+SmaI                            | This study |
| pAS019 | <i>pSC101* ori</i> , Kan <sup>R</sup> , <i>mCherry</i>                                                                                                         | AS135/AS136;<br>ScaI+EcoRI                           | This study |
| pAS020 | <i>pSC101* ori</i> , Amp <sup>R</sup> , P <sub>LlacO1</sub> - <i>lacI</i> - <i>Tcrp</i> -T1                                                                    | AS142/AS143;<br>XbaI                                 | This study |
| pAS021 | <i>pSC101* ori</i> , Amp <sup>R</sup> , P <sub>LlacO1</sub> - <i>lacI</i> - <i>TtonB</i> -T1                                                                   | AS144/AS145;<br>XbaI                                 | This study |
| pAS022 | <i>R6K ori</i> , Cam <sup>R</sup> - <i>frt</i> , <i>attP<sub>λ</sub></i> , P <sub>LlacO1</sub> - <i>tetR</i> (from pKT11)                                      | BamHI+SphI                                           | This study |
| pAS023 | <i>pSC101* ori</i> , Amp <sup>R</sup> , P <sub>LtetO1(A-11C, T-7G)</sub> - <i>Cl</i>                                                                           | AS171/AS172                                          | This study |
| pAS024 | <i>pSC101* ori</i> , Amp <sup>R</sup> , P <sub>LtetO1(A-11C, T-7G)</sub> - <i>yfp</i>                                                                          | AS171/AS172                                          | This study |
| pAS026 | <i>pSC101* ori</i> , Kan <sup>R</sup> , P <sub>LlacO1</sub> - <i>tetR</i> -P <sub>LlacO1</sub> - <i>lacI</i> -P <sub>LtetO1(A-11C, T-7G)</sub> - <i>Cl</i>     | AS098/AS099,<br>AS100/AS101,<br>AS102/AS103;<br>BglI | This study |
| pAS035 | <i>pSC101* ori</i> , Kan <sup>R</sup> , <i>yfp<sub>rev</sub></i>                                                                                               | AS129/AS195;<br>BglI                                 | This study |
| pAS036 | <i>pSC101* ori</i> , Kan <sup>R</sup> , P <sub>LtetO1</sub> - <i>yfp</i>                                                                                       | AS098/AS103;<br>BglI                                 | This study |
| pAS037 | <i>pSC101* ori</i> , Kan <sup>R</sup> , P <sub>LtetO1</sub> - <i>yfp<sub>rev</sub></i>                                                                         | AS129/AS134;<br>BglI                                 | This study |
| pAS038 | <i>pSC101* ori</i> , Amp <sup>R</sup> , P <sub>LlacO1</sub> - <i>lacI</i> -T1T2                                                                                | XbaI                                                 | This study |
| pAS039 | <i>pSC101* ori</i> , Kan <sup>R</sup> , P <sub>LlacO1</sub> - <i>tetR</i> -P <sub>LlacO1</sub> - <i>lacI</i> -T1T2-P <sub>LtetO1</sub> - <i>Cl</i>             | AS098/AS099,<br>AS100/AS282,<br>AS102/AS103;<br>BglI | This study |
| pAS040 | <i>pSC101* ori</i> , Kan <sup>R</sup> , P <sub>LlacO1</sub> - <i>lacI</i> - <i>Tcrp</i> -T1-P <sub>LlacO1</sub> - <i>lacI</i> -P <sub>LtetO1</sub> - <i>Cl</i> | AS098/AS099,<br>AS100/AS101,<br>AS102/AS103;<br>BglI | This study |
| pAS041 | <i>pSC101* ori</i> , Kan <sup>R</sup> , T1- <i>yfp</i>                                                                                                         | SaI                                                  | This study |
| pAS042 | <i>pSC101* ori</i> , Kan <sup>R</sup> , <i>Tcrp-yfp</i>                                                                                                        | AS283/AS284;<br>SaI                                  | This study |

|        |                                                                                                                                                |                                                      |                     |
|--------|------------------------------------------------------------------------------------------------------------------------------------------------|------------------------------------------------------|---------------------|
| pAS043 | <i>pSC101* ori, Kan<sup>R</sup>, TtonB-yfp</i>                                                                                                 | AS285/AS286;<br>Sall                                 | This study          |
| pAS045 | <i>pSC101* ori, Kan<sup>R</sup>, P<sub>LlacO1</sub>-lacI-P<sub>LtetO1(A-11C,T-7G)</sub>-cl-P<sub>LlacO1</sub>-tetR</i>                         | AS098/AS099,<br>AS100/AS101,<br>AS102/AS103;<br>BglI | This study          |
| pAS046 | <i>pSC101* ori, Kan<sup>R</sup>, P<sub>LlacO1</sub>-tetR-P<sub>LtetO1(A-11C,T-7G)</sub>-cl-P<sub>LlacO1</sub>-lacI<sub>r</sub></i>             | AS129/AS130,<br>AS131/AS132,<br>AS133/AS134;<br>BglI | This study          |
| pAS047 | <i>pSC101* ori, Kan<sup>R</sup>, P<sub>LlacO1</sub>-tetR-P<sub>LtetO1(A-11C,T-7G)</sub>-cl-P<sub>LlacO1</sub>-lacI</i>                         | AS098/AS099,<br>AS100/AS101,<br>AS102/AS103;<br>BglI | This study          |
| pAS050 | <i>pSC101* ori, Kan<sup>R</sup>, P<sub>LtetO1(A-11C,T-7G)</sub>-cl-P<sub>LlacO1</sub>-lacI<sub>r</sub>-P<sub>LlacO1</sub>-tetR<sub>r</sub></i> | AS129/AS130,<br>AS131/AS132,<br>AS133/AS134;<br>BglI | This study          |
| pAS051 | <i>pSC101* ori, Kan<sup>R</sup>, P<sub>LlacO1</sub>-lacI<sub>r</sub>-P<sub>LtetO1(A-11C,T-7G)</sub>-cl-P<sub>LlacO1</sub>-tetR<sub>r</sub></i> | AS129/AS130,<br>AS131/AS132,<br>AS133/AS134;<br>BglI | This study          |
| pAS053 | <i>pSC101* ori, Kan<sup>R</sup>, P<sub>LlacO1</sub>-tetR-P<sub>LlacO1</sub>-lacI-Tcrp-P<sub>LtetO1</sub>-cl</i>                                | AS098/AS099,<br>AS100/AS147,<br>AS102/AS103;<br>BglI | This study          |
| pAS055 | <i>pSC101* ori, Kan<sup>R</sup>, P<sub>LlacO1</sub>-tetR-P<sub>LlacO1</sub>-lacI-TtonB-P<sub>LtetO1</sub>-cl</i>                               | AS098/AS099,<br>AS100/AS153,<br>AS102/AS103;<br>BglI | This study          |
| pCC01  | <i>R6K ori, Cam<sup>R</sup>-frt, attP<sub>λ</sub>, P<sub>lac</sub>-yfp</i>                                                                     | AS198/AS199;<br>EcoRI+SphI                           | This study          |
| pKT10  | <i>pSC101* ori, Kan<sup>R</sup></i>                                                                                                            | XhoI+Sall                                            | This study          |
| pKT11  | <i>R6K ori, Cam<sup>R</sup>-frt, attP<sub>P21</sub>, P<sub>LlacO1</sub>-tetR</i>                                                               | KTp90/KTp91;<br>BamHI+SphI                           | This study          |
| pKT12  | <i>R6K ori, Cam<sup>R</sup>-frt, attP<sub>HK022</sub>, P<sub>LlacO1</sub>-lacI</i>                                                             | KTp90/KTp91;<br>BamHI+SphI                           | This study          |
| D052   | <i>pSC101* ori, Amp<sup>R</sup>, P<sub>LlacO1</sub>-lacI<sub>f</sub>-P<sub>LtetO1</sub>-cl-P<sub>LlacO1</sub>-lacI-P<sub>R</sub>-gfp</i>       |                                                      | (Guet et al., 2002) |
| pN1    | <i>pSC101* ori, Kan<sup>R</sup>, P<sub>LtetO1</sub>-cl-P<sub>LlacO1</sub>-lacI-P<sub>LlacO1</sub>-tetR (CLT)</i>                               | AS098/AS099,<br>AS100/AS101,                         | This study          |
| pN2    | <i>pSC101* ori, Kan<sup>R</sup>, P<sub>LtetO1</sub>-cl-P<sub>LlacO1</sub>-tetR-P<sub>LlacO1</sub>-lacI (CTL)</i>                               | AS102/AS103;<br>BglI                                 | This study          |

|      |                                                                                                                                                                                                   |                                                      |            |
|------|---------------------------------------------------------------------------------------------------------------------------------------------------------------------------------------------------|------------------------------------------------------|------------|
| pN3  | <i>pSC101* ori, Kan<sup>R</sup>, P<sub>LlacO1</sub>-lacI-P<sub>LtetO1</sub>-cl-P<sub>LlacO1</sub>-tetR</i><br>(LCT)                                                                               |                                                      | This study |
| pN4  | <i>pSC101* ori, Kan<sup>R</sup>, P<sub>LlacO1</sub>-lacI-P<sub>LlacO1</sub>-tetR-P<sub>LtetO1</sub>-cl</i><br>(LTC)                                                                               |                                                      | This study |
| pN5  | <i>pSC101* ori, Kan<sup>R</sup>, P<sub>LlacO1</sub>-tetR-P<sub>LtetO1</sub>-cl-P<sub>LlacO1</sub>-lacI</i><br>(TCL)                                                                               |                                                      | This study |
| pN6  | <i>pSC101* ori, Kan<sup>R</sup>, P<sub>LlacO1</sub>-tetR-P<sub>LlacO1</sub>-lacI-P<sub>LtetO1</sub>-cl</i><br>(TLC)                                                                               |                                                      | This study |
| pN9  | <i>pSC101* ori, Kan<sup>R</sup>, P<sub>LlacO1</sub>-lacI-P<sub>LtetO1</sub>-cl<sub>r</sub>-P<sub>LlacO1</sub>-tetR</i><br>(LC <sub>r</sub> T)                                                     |                                                      | This study |
| pN10 | <i>pSC101* ori, Kan<sup>R</sup>, P<sub>LlacO1</sub>-lacI-P<sub>LlacO1</sub>-tetR<sub>r</sub>-P<sub>LtetO1</sub>-cl</i><br>(LT <sub>r</sub> C)                                                     | AS098/AS099,<br>Ktp46/AS132,<br>AS102/AS103;<br>BglI | This study |
| pN11 | <i>pSC101* ori, Kan<sup>R</sup>, P<sub>LlacO1</sub>-tetR-P<sub>LtetO1</sub>-cl<sub>r</sub>-P<sub>LlacO1</sub>-lacI</i><br>(TC <sub>r</sub> L)                                                     |                                                      | This study |
| pN12 | <i>pSC101* ori, Kan<sup>R</sup>, P<sub>LlacO1</sub>-tetR-P<sub>LlacO1</sub>-lacI<sub>r</sub>-P<sub>LtetO1</sub>-cl</i><br>(TL <sub>r</sub> C)                                                     |                                                      | This study |
| pN13 | <i>pSC101* ori, Kan<sup>R</sup>, P<sub>LtetO1</sub>-cl-P<sub>LlacO1</sub>-lacI-P<sub>LlacO1</sub>-tetR<sub>r</sub></i><br>(CLT <sub>r</sub> )                                                     |                                                      | This study |
| pN14 | <i>pSC101* ori, Kan<sup>R</sup>, P<sub>LtetO1</sub>-cl-P<sub>LlacO1</sub>-tetR-P<sub>LlacO1</sub>-lacI<sub>r</sub></i><br>(CTL <sub>r</sub> )                                                     | AS098/AS099,<br>AS100/Ktp45,<br>AS133/AS134;<br>BglI | This study |
| pN16 | <i>pSC101* ori, Kan<sup>R</sup>, P<sub>LlacO1</sub>-lacI-P<sub>LlacO1</sub>-tetR-P<sub>LtetO1</sub>-cl<sub>r</sub></i><br>(LTC <sub>r</sub> )                                                     |                                                      | This study |
| pN18 | <i>pSC101* ori, Kan<sup>R</sup>, P<sub>LlacO1</sub>-tetR-P<sub>LlacO1</sub>-lacI-P<sub>LtetO1</sub>-cl<sub>r</sub></i><br>(TLC <sub>r</sub> )                                                     |                                                      | This study |
| pN19 | <i>pSC101* ori, Kan<sup>R</sup>, P<sub>LtetO1</sub>-cl-P<sub>LlacO1</sub>-lacI<sub>r</sub>-P<sub>LlacO1</sub>-tetR<sub>r</sub></i><br>(CL <sub>r</sub> T <sub>r</sub> )                           |                                                      | This study |
| pN20 | <i>pSC101* ori, Kan<sup>R</sup>, P<sub>LtetO1</sub>-cl-P<sub>LlacO1</sub>-tetR<sub>r</sub>-P<sub>LlacO1</sub>-lacI<sub>r</sub></i><br>(CT <sub>r</sub> L <sub>r</sub> )                           |                                                      | This study |
| pN21 | <i>pSC101* ori, Kan<sup>R</sup>, P<sub>LlacO1</sub>-lacI-P<sub>LtetO1</sub>-cl<sub>r</sub>-P<sub>LlacO1</sub>-tetR<sub>r</sub></i><br>(LC <sub>r</sub> T <sub>r</sub> )                           | AS098/AS099,<br>Ktp46/AS132,<br>AS133/AS134;<br>BglI | This study |
| pN22 | <i>pSC101* ori, Kan<sup>R</sup>, P<sub>LlacO1</sub>-lacI-P<sub>LlacO1</sub>-tetR<sub>r</sub>-P<sub>LtetO1</sub>-cl<sub>r</sub></i><br>(LT <sub>r</sub> C <sub>r</sub> )                           |                                                      | This study |
| pN23 | <i>pSC101* ori, Kan<sup>R</sup>, P<sub>LlacO1</sub>-tetR-P<sub>LtetO1</sub>-cl<sub>r</sub>-P<sub>LlacO1</sub>-lacI<sub>r</sub></i><br>(TC <sub>r</sub> L <sub>r</sub> )                           |                                                      | This study |
| pN24 | <i>pSC101* ori, Kan<sup>R</sup>, P<sub>LlacO1</sub>-tetR-P<sub>LlacO1</sub>-lacI<sub>r</sub>-P<sub>LtetO1</sub>-cl<sub>r</sub></i><br>(TL <sub>r</sub> C <sub>r</sub> )                           |                                                      | This study |
| pN25 | <i>pSC101* ori, Kan<sup>R</sup>, P<sub>LtetO1</sub>-cl<sub>r</sub>-P<sub>LlacO1</sub>-lacI<sub>r</sub>-P<sub>LlacO1</sub>-tetR<sub>r</sub></i><br>(C <sub>r</sub> L <sub>r</sub> T <sub>r</sub> ) |                                                      | This study |
| pN26 | <i>pSC101* ori, Kan<sup>R</sup>, P<sub>LtetO1</sub>-cl<sub>r</sub>-P<sub>LlacO1</sub>-tetR<sub>r</sub>-P<sub>LlacO1</sub>-lacI<sub>r</sub></i><br>(C <sub>r</sub> T <sub>r</sub> L <sub>r</sub> ) | AS129/AS130,<br>AS131/AS132,<br>AS133/AS134;<br>BglI | This study |
| pN27 | <i>pSC101* ori, Kan<sup>R</sup>, P<sub>LlacO1</sub>-lacI<sub>r</sub>-P<sub>LtetO1</sub>-cl<sub>r</sub>-P<sub>LlacO1</sub>-tetR<sub>r</sub></i><br>(L <sub>r</sub> C <sub>r</sub> T <sub>r</sub> ) |                                                      | This study |
| pN28 | <i>pSC101* ori, Kan<sup>R</sup>, P<sub>LlacO1</sub>-lacI<sub>r</sub>-P<sub>LlacO1</sub>-tetR<sub>r</sub>-P<sub>LtetO1</sub>-cl<sub>r</sub></i>                                                    |                                                      | This study |

|                    |                                                                                                                                                                                                                                                 |                                                      |                              |
|--------------------|-------------------------------------------------------------------------------------------------------------------------------------------------------------------------------------------------------------------------------------------------|------------------------------------------------------|------------------------------|
|                    | (L <sub>r</sub> T <sub>r</sub> C <sub>r</sub> )                                                                                                                                                                                                 |                                                      |                              |
| pN29               | <i>pSC101</i> * <i>ori</i> , Kan <sup>R</sup> , P <sub>LlacO1</sub> - <i>tetR</i> <sub>r</sub> -P <sub>LtetO1</sub> - <i>cl</i> <sub>r</sub> -P <sub>LlacO1</sub> - <i>lacI</i> <sub>r</sub><br>(T <sub>r</sub> C <sub>r</sub> L <sub>r</sub> ) |                                                      | This study                   |
| pN30               | <i>pSC101</i> * <i>ori</i> , Kan <sup>R</sup> , P <sub>LlacO1</sub> - <i>tetR</i> <sub>r</sub> -P <sub>LlacO1</sub> - <i>lacI</i> <sub>r</sub> -P <sub>LtetO1</sub> - <i>cl</i> <sub>r</sub><br>(T <sub>r</sub> L <sub>r</sub> C <sub>r</sub> ) |                                                      | This study                   |
| pN33               | <i>pSC101</i> * <i>ori</i> , Kan <sup>R</sup> , P <sub>LlacO1</sub> - <i>lacI</i> <sub>r</sub> -P <sub>LtetO1</sub> - <i>cl</i> <sub>r</sub> -P <sub>LlacO1</sub> - <i>tetR</i><br>(L <sub>r</sub> C <sub>r</sub> T)                            |                                                      | This study                   |
| pN34               | <i>pSC101</i> * <i>ori</i> , Kan <sup>R</sup> , P <sub>LlacO1</sub> - <i>lacI</i> <sub>r</sub> -P <sub>LlacO1</sub> - <i>tetR</i> <sub>r</sub> -P <sub>LtetO1</sub> - <i>cl</i><br>(L <sub>r</sub> T <sub>r</sub> C)                            | AS129/AS130,<br>AS131/AS132,<br>AS102/AS103;<br>BglI | This study                   |
| pN35               | <i>pSC101</i> * <i>ori</i> , Kan <sup>R</sup> , P <sub>LlacO1</sub> - <i>tetR</i> <sub>r</sub> -P <sub>LtetO1</sub> - <i>cl</i> <sub>r</sub> -P <sub>LlacO1</sub> - <i>lacI</i><br>(T <sub>r</sub> C <sub>r</sub> L)                            |                                                      | This study                   |
| pN36               | <i>pSC101</i> * <i>ori</i> , Kan <sup>R</sup> , P <sub>LlacO1</sub> - <i>tetR</i> <sub>r</sub> -P <sub>LlacO1</sub> - <i>lacI</i> <sub>r</sub> -P <sub>LtetO1</sub> - <i>cl</i><br>(T <sub>r</sub> L <sub>r</sub> C)                            |                                                      | This study                   |
| pN37               | <i>pSC101</i> * <i>ori</i> , Kan <sup>R</sup> , P <sub>LtetO1</sub> - <i>cl</i> <sub>r</sub> -P <sub>LlacO1</sub> - <i>lacI</i> <sub>r</sub> -P <sub>LlacO1</sub> - <i>tetR</i><br>(C <sub>r</sub> LT)                                          |                                                      | This study                   |
| pN39               | <i>pSC101</i> * <i>ori</i> , Kan <sup>R</sup> , P <sub>LlacO1</sub> - <i>lacI</i> <sub>r</sub> -P <sub>LtetO1</sub> - <i>cl</i> <sub>r</sub> -P <sub>LlacO1</sub> - <i>tetR</i><br>(L <sub>r</sub> CT)                                          | AS129/AS130,<br>AS100/AS101,<br>AS102/AS103;<br>BglI | This study                   |
| pN41               | <i>pSC101</i> * <i>ori</i> , Kan <sup>R</sup> , P <sub>LlacO1</sub> - <i>tetR</i> <sub>r</sub> -P <sub>LtetO1</sub> - <i>cl</i> <sub>r</sub> -P <sub>LlacO1</sub> - <i>lacI</i><br>(T <sub>r</sub> CL)                                          |                                                      | This study                   |
| pN43               | <i>pSC101</i> * <i>ori</i> , Kan <sup>R</sup> , P <sub>LtetO1</sub> - <i>cl</i> <sub>r</sub> -P <sub>LlacO1</sub> - <i>lacI</i> <sub>r</sub> -P <sub>LlacO1</sub> - <i>tetR</i> <sub>r</sub><br>(C <sub>r</sub> LT <sub>r</sub> )               |                                                      | This study                   |
| pN44               | <i>pSC101</i> * <i>ori</i> , Kan <sup>R</sup> , P <sub>LtetO1</sub> - <i>cl</i> <sub>r</sub> -P <sub>LlacO1</sub> - <i>tetR</i> <sub>r</sub> -P <sub>LlacO1</sub> - <i>lacI</i> <sub>r</sub><br>(C <sub>r</sub> TL <sub>r</sub> )               | AS129/AS130,<br>AS100/KTp45,<br>AS133/AS134;<br>BglI | This study                   |
| pN45               | <i>pSC101</i> * <i>ori</i> , Kan <sup>R</sup> , P <sub>LlacO1</sub> - <i>lacI</i> <sub>r</sub> -P <sub>LtetO1</sub> - <i>cl</i> <sub>r</sub> -P <sub>LlacO1</sub> - <i>tetR</i> <sub>r</sub><br>(L <sub>r</sub> CT <sub>r</sub> )               |                                                      | This study                   |
| pN47               | <i>pSC101</i> * <i>ori</i> , Kan <sup>R</sup> , P <sub>LlacO1</sub> - <i>tetR</i> <sub>r</sub> -P <sub>LtetO1</sub> - <i>cl</i> <sub>r</sub> -P <sub>LlacO1</sub> - <i>lacI</i> <sub>r</sub><br>(T <sub>r</sub> CL <sub>r</sub> )               |                                                      | This study                   |
| pN49               | <i>pSC101</i> * <i>ori</i> , Kan <sup>R</sup> , P <sub>LtetO1</sub> - <i>yfp</i> <sub>r</sub> -P <sub>LlacO1</sub> - <i>lacI</i> <sub>r</sub> -P <sub>LlacO1</sub> - <i>tetR</i><br>(VLT)                                                       | AS098/AS099,<br>AS100/AS101,<br>AS102/AS103;<br>BglI | This study                   |
| pN54               | <i>pSC101</i> * <i>ori</i> , Kan <sup>R</sup> , P <sub>LlacO1</sub> - <i>tetR</i> <sub>r</sub> -P <sub>LlacO1</sub> - <i>lacI</i> <sub>r</sub> -P <sub>LtetO1</sub> - <i>yfp</i><br>(TLV)                                                       |                                                      | This study                   |
| pZS*12- <i>gfp</i> | <i>pSC101</i> * <i>ori</i> , Amp <sup>R</sup> , P <sub>LlacO1</sub> - <i>gfp</i>                                                                                                                                                                |                                                      | Laboratory stock             |
| pZS*2R- <i>gfp</i> | <i>pSC101</i> * <i>ori</i> , Kan <sup>R</sup> , P <sub>R</sub> - <i>gfp</i>                                                                                                                                                                     |                                                      | Laboratory stock             |
| pZS*11- <i>yfp</i> | <i>pSC101</i> * <i>ori</i> , Amp <sup>R</sup> , P <sub>LtetO1</sub> - <i>yfp</i>                                                                                                                                                                |                                                      | Laboratory stock             |
| pZA31-CFP          | <i>P15A ori</i> , Cam <sup>R</sup> , P <sub>LtetO1</sub> - <i>cfp</i>                                                                                                                                                                           |                                                      | Laboratory stock             |
| pLA2               | <i>R6K ori</i> , Kan <sup>R</sup> , <i>attP</i> <sub>λ</sub>                                                                                                                                                                                    |                                                      | (Haldimann and Wanner, 2001) |

|                    |                                                                     |  |                             |
|--------------------|---------------------------------------------------------------------|--|-----------------------------|
| pBS3Clu<br>x       | <i>pMB1 ori, Amp<sup>R</sup>, P<sub>lac</sub>-mCherry, luxABCDE</i> |  | (Radeck et al., 2013)       |
| pKD3               | <i>R6K ori, Cam<sup>R</sup>-frr, Amp<sup>R</sup></i>                |  | (Datsenko and Wanner, 2000) |
| pKD13              | <i>R6K ori, Kan<sup>R</sup>-frr, Amp<sup>R</sup></i>                |  | (Datsenko and Wanner, 2000) |
| pAH68-<br>frr-cat  | <i>R6K ori, Cam<sup>R</sup>-frr, attP<sub>HK022</sub></i>           |  | (Pleška et al., 2016)       |
| pAH120-<br>frr-cat | <i>R6K ori, Cam<sup>R</sup>-frr, attP<sub>λ</sub></i>               |  | (Pleška et al., 2016)       |

<sup>a</sup> Amp – ampicillin resistance, Kan – kanamycin resistance, Cam – chloramphenicol resistance

**Table S4. ANOVA test statistics.**

| <b>IPTG [mM]</b> | <b>F(DFn, DFd)</b> | <b>P value</b> |
|------------------|--------------------|----------------|
| 0                | $F_{2,24}=1.957$   | P=0.1632       |
| 0.1              | $F_{2,24}=14.87$   | P<0.0001       |
| 0.2              | $F_{2,24}=13.08$   | P=0.0001       |
| 0.3              | $F_{2,18}=22.53$   | P<0.0001       |
| 0.4              | $F_{2,21}=7.345$   | P=0.0038       |
| 1                | $F_{2,24}=4.500$   | P=0.0219       |

860



861 **Figure captions**

862 **Figure 1. Architecture and phenotypes of the gene regulatory network.** **A.** Diagram of  
863 interactions between the three independent TUs encoding for the repressors, *lacI*, *tetR*, and *cl*,  
864 their respective inducers IPTG and aTc, and the promoters they control, with *yfp* as the GRN  
865 output (left). Phenotype of this GRN as predicted by our mathematical model (right). **B.** Genetic  
866 architecture of TU permutations of GRN plasmid (left). Cartoon of TU permutations (right).  
867 Abbreviations used throughout the text: C stands for *cl*, L for *lacI*, and T for *tetR*. Letter *r*  
868 denotes reverse orientation. **C** and **D.** Fluorescence of cells carrying a representative subset of  
869 different TU permutations of the GRN plasmid. A binary output value (On or Off) was assigned  
870 to each environment which thus defines a logical operation: NOT (aTc) in panel **C** and NOR in  
871 panel **D**. Graphs show means and error bars standard deviations for three independent  
872 biological replicates.

873

874 **Figure 2. Changes in relative TU order lead to qualitative changes of phenotype.** Fluorescence  
875 of cells carrying six different TU permutations of the GRN on a plasmid (**A**), three GRN variants  
876 integrated on the chromosome at the phage HK022 attachment site (**B**), and with each of the  
877 repressor genes integrated at separate chromosomal loci (**C**). Graphs show population level  
878 fluorescence measurements of strains exposed to: no inducer, aTc, IPTG, or a combination of  
879 aTc and IPTG (as indicated). Graph shows mean and standard deviations for three independent  
880 biological replicates. Flow cytometry histograms of cell fluorescence show 10,000 gated events,  
881 corresponding to YFP expressed in a given strain grown without (solid line) and with IPTG

882 (dotted line). For each strain and condition, three biological replicates are shown. Relative TU  
883 order of the three repressors is shown under the respective graphs.

884

885 **Figure 3. Differences in *cl* expression lead to TU order dependent phenotypes. A.** RT-qPCR  
886 analysis of *cl* expression. RT-qPCR was performed, using *cl*-specific primers. The induction ratios  
887 were calculated relative to the uninduced strain CLT. **B.** YFP levels measured in strains VLT and  
888 TLV which carry a *yfp* reporter (*V*) under control of  $P_{tet}$  and differ only in relative TU order. **C.**  
889 Heatmaps show  $P_R$  promoter activity in six strains carrying plasmids differing in relative TU  
890 order (left) and activity of  $P_{tet}$  present *in trans* in the same strains on a second plasmid (right).  
891 **D.** Relative TU order effects depend on expression from the *lac* promoter in IPTG-dependent  
892 manner. Strains CLT and TLC were grown in presence of different concentrations of IPTG. **B - D.**  
893 Strains were exposed to aTc, IPTG, or a combination of aTc and IPTG (as indicated). For reasons  
894 of clarity, in **C.** the highest expression level for each strain was individually normalized. Graphs  
895 show means and error bars standard deviations for three independent biological replicates.

896

897 **Figure 4. Phenotype of strain TLC can be explained by transcriptional read-through. A.** Genetic  
898 architecture of plasmid fragments encoding three repressors in strains TLC and TLC<sub>-10</sub> (carrying  
899 mutations in the -10 promoter element of  $P_{tet}$ ). Promoters are marked as bent arrows,  
900 terminators are represented by vertical bars and a circle, monocistronic transcripts are  
901 represented by solid arrows, predicted read-through transcripts by dashed arrows (left).  
902 Interaction diagrams within the two GRNs. Solid lines represent interactions between  
903 transcription factors and the promoters they control, dashed line represents effects resulting

904 from local genetic context (right). **B.** Fluorescence of cells carrying TLC plasmid with either  $P_{tet}$   
905 or  $P_{tet}$  carrying a mutation in the -10 promoter element (TLC<sub>-10</sub>) grown in presence or absence  
906 of aTc and IPTG. We expected that if GRN behavior is due to transcriptional read-through,  
907 mutating the  $P_{tet}$  promoter should not affect the responsiveness to IPTG. If, on the other hand,  
908 expression of *cl* was driven only by  $P_{tet}$ , mutating the -10 promoter element should lead to an  
909 ALL ON phenotype. Lack of repression in strains with  $P_{tet-10}$  variant after aTc induction further  
910 confirms that this promoter variant is inactive. Graph shows means and error bars standard  
911 deviations for three independent biological replicates.

912

913 **Figure 5. Change of terminator leads to qualitative change in phenotype. A.** Genetic  
914 architecture of plasmid fragments encoding three repressors in strains TLC with different  
915 terminators: T1, T1T2, *Tcrp* or *TtonB*, preceding *cl*, and fluorescence of cells carrying these  
916 plasmids grown in presence or absence of aTc and IPTG. **B.** Genetic architecture of plasmid  
917 fragments encoding three repressors in strains LCT with either T1 or a double *Tcrp*-T1  
918 terminator, and fluorescence of cells carrying these plasmids grown in presence or absence of  
919 aTc and IPTG. **A.** and **B.** Promoters are marked as bent arrows, terminators are represented by  
920 vertical bars and a circle, operators as rectangles, monocistronic transcripts are represented by  
921 solid arrows, predicted read-through transcripts by dashed arrows. Increasing line thickness  
922 corresponds to increasing amount of transcript. Graph shows means and error bars standard  
923 deviations for three independent biological replicates.

924

925 **Figure 6. Effect of genetic context of *lacI* repressor chromosomal position on  $P_{lac}$  activity. A.**

926 Diagram of interactions between LacI repressor and the promoter it represses, as well as  
927 genetic architecture of the DNA fragments integrated into MG1655  $\Delta lacI \Delta lacZYA$  strain.  
928 Promoters are marked as bent arrows, terminators are represented by vertical bars and a circle,  
929 operators as rectangles. **B.**  $P_{lac}$  activity in cells carrying *lacI* inserted at different loci after a weak  
930 (*yeaH*), medium (*flhC*) and strong (*asnT*) terminator grown in different concentrations of IPTG.  
931 *yfp* levels were measured in exponentially growing cells. Graph shows means for at least three  
932 independent biological replicates. **C.** RT-qPCR quantification of *lacI* transcript in strains  
933 described above. RT-qPCR was performed, using *lacI*-specific primers. The induction ratios were  
934 calculated relative to the strain with insertion in *yeaH* locus. **D.** Ethidium bromide-stained 1%  
935 agarose gel of PCR products obtained with primers spanning the intergenic region between the  
936 upstream gene (*yeaH*, *flhC* or *asnT*) and *lacI*. Templates for PCR were: chromosomal DNA  
937 (gDNA), cDNA as used for RT-qPCR above, and RNA.

938

939 **Figure 7. Architecture of a regulon depends on local genetic context. A.** Diagram of

940 interactions within our GRN in two different TU arrangements: CLT and TLC. **B.** Regulatory  
941 patterns in two regulons with overlapping components. Genes Gene<sub>1</sub> and Gene<sub>2</sub> are regulated  
942 via transcription factor-operator interactions with regulator TF<sub>1</sub>. Gene Gene<sub>3</sub> is regulated by TF<sub>2</sub>  
943 binding and by TF<sub>1</sub> via local genetic context effects. **A. and B.** Solid lines represent interactions  
944 between transcription factors and the promoters they control, dashed line represents effects  
945 resulting from local genetic context. Promoters are marked as bent arrows, terminators are  
946 represented by vertical bars and a circle.

947 **Figure S1. A model of the mechanistic basis of gene expression, including transcriptional read-**  
948 **through. A.** The topology of network interactions used in the model, along with the equations  
949 that model them. Term in red represent transcriptional read-through. **B.** Two examples of  
950 transcriptional read-through. In the first example (top), transcription of *lacI* leads to  
951 transcriptional read-through into *tetR* and *cl*. This is modeled by additive terms for the rate of  
952 transcription of both *tetR* and *cl*. In the second example (bottom), expression of *cl* leads to  
953 transcriptional read-through into *tetR*. Because *lacI* is on the opposite strand from *tetR*,  
954 expression of *tetR* is assumed not to influence expression of *lacI*. **C.** Range of values that fit the  
955 experimental results. Contour plot for a parameter scan for  $K$  in  $[0,0.5]$  and  $\mu$  in  $[0,1]$ , both with  
956 a step size of 0.05. For  $K$  in  $[0,0.21]$  and  $\mu$  in  $[0.4,1]$ , both parameters were scanned with a step  
957 size of 0.01. Lighter colors means higher number of networks correctly fitted.

958

959 **Figure S2. GRNs in which phenotype is dependent only on changes in relative TU order and**  
960 **orientation.** Fluorescence of cells carrying 26 different TU permutations of the GRN plasmid,  
961 grouped in pairs differing only in orientation with respect to plasmid backbone. Graphs show  
962 means and error bars standard deviations for three independent biological replicates. Shading  
963 marks strains which behave as predicted by the mathematical model incorporating  
964 transcriptional read-through (grey, **A.**), white boxes denote strains which do not (**B.**).

965

966 **Figure S3. GRNs in which the influence of plasmid-encoded genetic elements cannot be ruled**  
967 **out.** Fluorescence of cells carrying 11 different TU permutations of the GRN plasmid, grouped in  
968 pairs differing only in orientation with respect to plasmid backbone. Shading marks strains

969 which behave as predicted by the mathematical model incorporating transcriptional read-  
970 through (grey), white boxes denote strains which do not. **A.** GRNs in which pairs do not show  
971 consistent phenotype, indicating influence of plasmid-encoded elements. **B.** Pairs in which only  
972 one GRN was cloned, making comparison impossible. Graphs show means and error bars  
973 standard deviations for three independent biological replicates.

974

975 **Figure S4. Phenotype of strains LCT, T<sub>r</sub>C<sub>r</sub>L<sub>r</sub>, TCL, L<sub>r</sub>C<sub>r</sub>T<sub>r</sub>, TLC and C<sub>r</sub>L<sub>r</sub>T<sub>r</sub> can be explained by**  
976 **transcriptional read-through.** Genetic architecture of plasmid fragments encoding three  
977 repressors in strains LCT and T<sub>r</sub>C<sub>r</sub>L<sub>r</sub> (**A.**), TCL and L<sub>r</sub>C<sub>r</sub>T<sub>r</sub> (**B.**), TLC and C<sub>r</sub>L<sub>r</sub>T<sub>r</sub> (**C.**) and their  
978 derivatives carrying mutations in the -10 promoter element of *P<sub>tet</sub>*, together with fluorescence  
979 of cells carrying these plasmids grown in presence or absence of aTc and IPTG. We expected  
980 that if GRN behavior is due to transcriptional read-through, mutating the *P<sub>tet</sub>* promoter should  
981 not affect the responsiveness to IPTG. If, on the other hand, expression of *ci* was driven only by  
982 *P<sub>tet</sub>*, mutating the -10 promoter element should lead to an ALL ON phenotype. Lack of  
983 repression in strains with *P<sub>tet-10</sub>* variant after aTc induction further confirms that this promoter  
984 variant is inactive. Monocistronic transcripts are represented by solid arrows, predicted read-  
985 through transcripts by dashed arrows. Graph shows means and error bars standard deviations  
986 for three independent biological replicates.

987

988 **Figure S5. Point mutations in -10 promoter element render *P<sub>tet</sub>* inactive.** Fluorescence of cells  
989 carrying either wild type *P<sub>tet</sub>* or *P<sub>tet</sub>* with two point mutations in the -10 element driving *yfp*

990 expression. Strains were grown without inducers. Graphs show means and error bars standard  
991 deviations for three independent biological replicates.

992

993 **Figure S6. Northern blot assay shows read-through transcript in strains carrying *Tcrp* and**

994 ***TtonB*. A.** Schematic representation of the plasmid fragments encoding three repressors in

995 strains TLC, TL<sup>*Tcrp*</sup>C and TL<sup>*TtonB*</sup>C. Shading marks regions which differ between the three GRNs. **B.**

996 Northern blot analysis of *cl*, *lacl*, and *kanR* expression. Seven micrograms of total RNA (–, no

997 induction; +, with IPTG induction) was loaded on a formaldehyde gel, and Northern blot

998 analysis was performed as described in Materials and Methods. NC – negative control, strain

999 carrying network plasmid not encoding any transcription factor genes. Ethidium bromide

1000 staining of 23S and 16S rRNA is shown as a loading control.

1001

1002 **Figure S7. Terminator containing DNA fragments between repressor genes show no cryptic**

1003 **promoter activity.** Fluorescence of cells carrying DNA fragments located on GRN plasmids

1004 between *lacl* and *cl*, and encoding T1, *Tcrp* and *TtonB*, cloned in front of a promoterless *yfp*

1005 gene, and compared to *Ptet* activity. Graphs show means and error bars standard deviations

1006 for three independent biological replicates..

1007

1008 **Figure S8. Influence of plasmid genetic elements on gene expression levels. A.** Fluorescence of

1009 cells carrying a promoterless *yfp* gene cloned adjacent to the origin of replication, *ori*. **B.**

1010 Fluorescence of cells carrying *P<sub>tet</sub>-yfp* cloned in two orientations relative to *ori* and *kanR*

1011 measured in a strain carrying chromosomally encoded *tetR*. **A - B.** Strains were exposed to IPTG

1012 or grown without inducers. Genetic architecture of relevant plasmid fragment is given above  
1013 the graph. Promoters are marked as bent arrows, terminators are represented by vertical bars  
1014 and a circle. Graphs show means and error bars standard deviations for three independent  
1015 biological replicates.

1016

1017 **Figure S9.  $P_{lac}$  activity differs significantly in cells carrying *lacI* inserted after a weak (*yeaH*),**  
1018 **medium (*flhC*) and strong (*asnT*) terminator grown in different concentrations of IPTG.** Bars  
1019 are mean values, circles individual measurements. Error bars are standard deviations. Stars  
1020 indicate strains that significantly differ from each other (\* P-value <0.05, \*\* <0.005, \*\*\*  
1021 <0.0005, \*\*\*\* <0.0001).

1022

1023 **Figure S10. Distribution of phenotypes depending on the threshold applied to define ON and**  
1024 **OFF states. A.** Definition of the logic operations. Presence or absence of inducer is indicated  
1025 with + and -, and output by On and Off. **B.** Histogram shows the fraction of networks that can  
1026 be assigned to a given phenotype depending on threshold. The threshold we used to assign  
1027 phenotypes is marked with a dashed line.



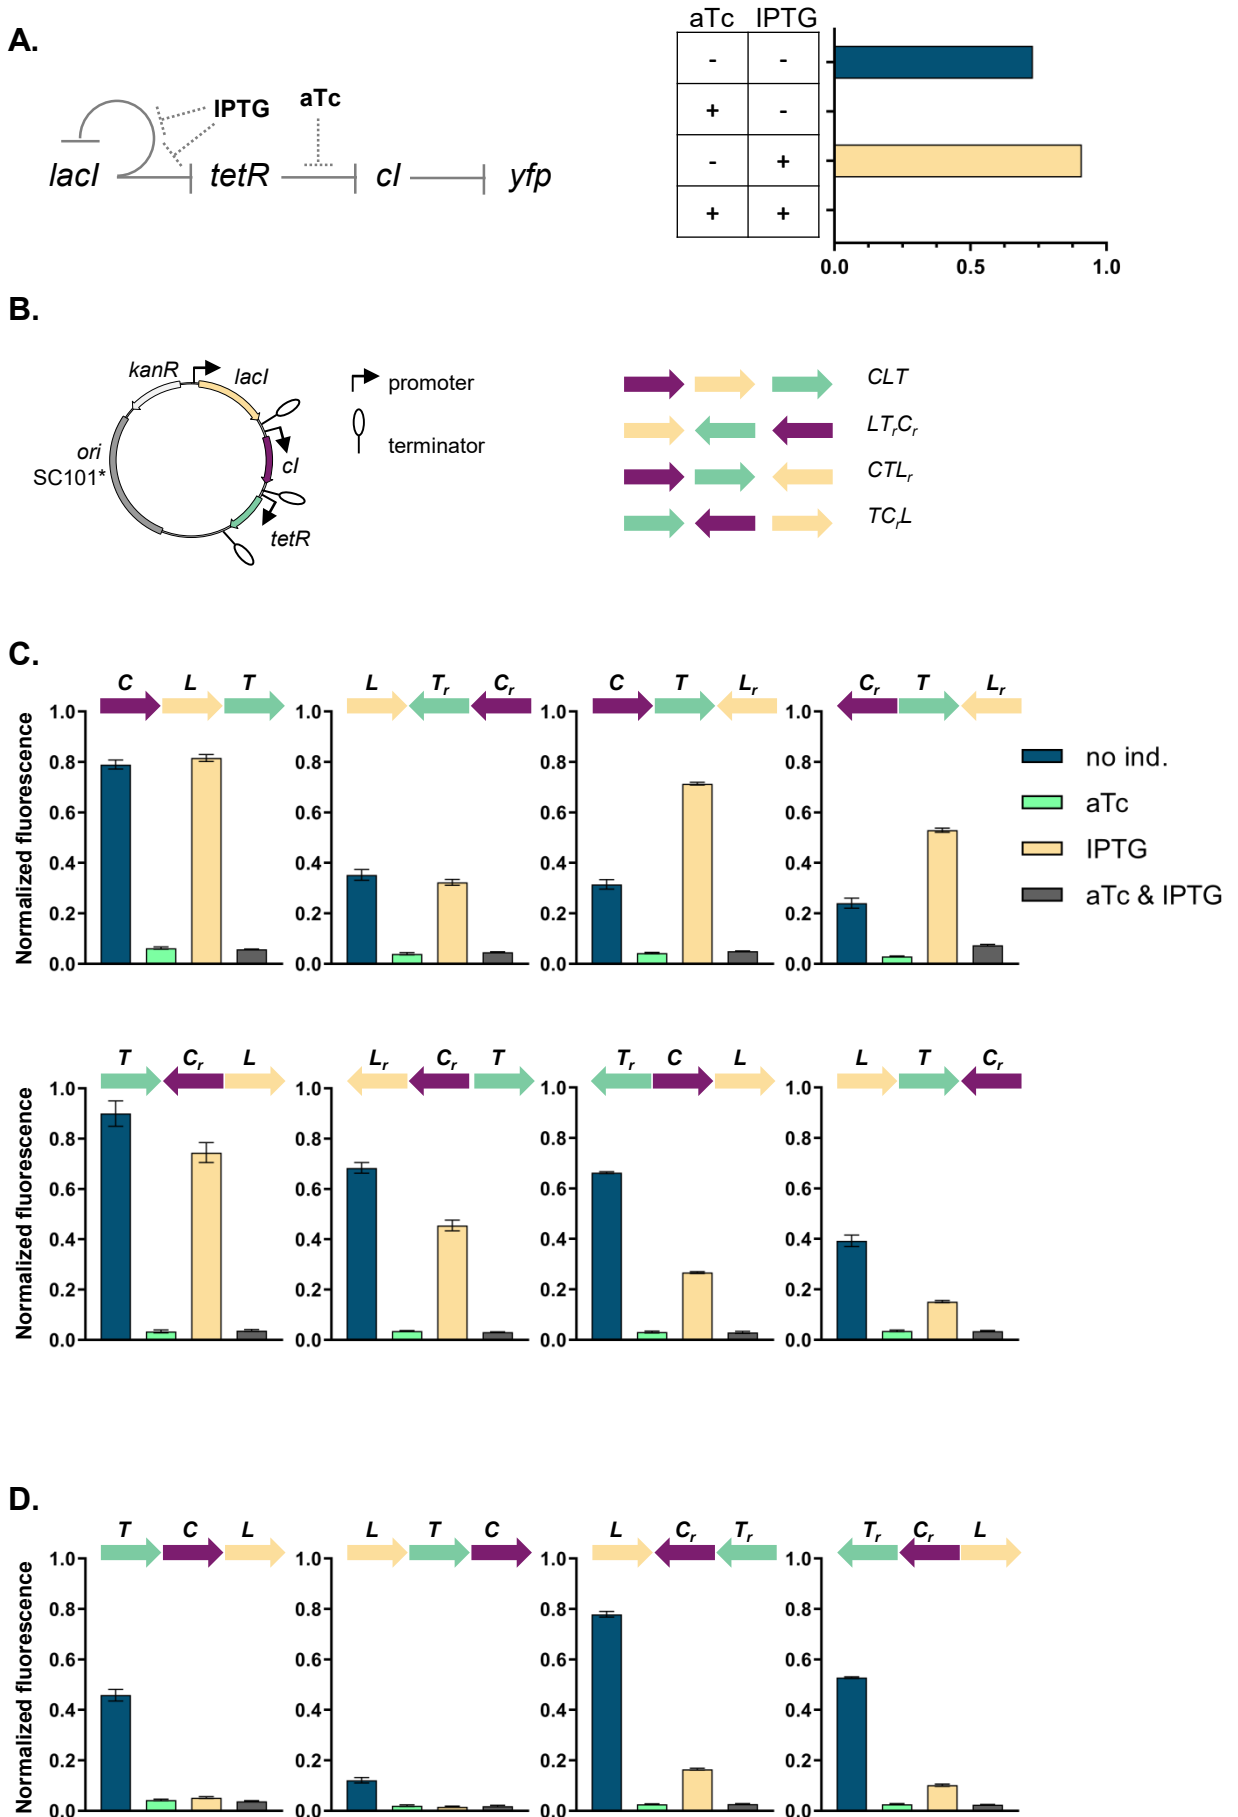

Figure 1

A.

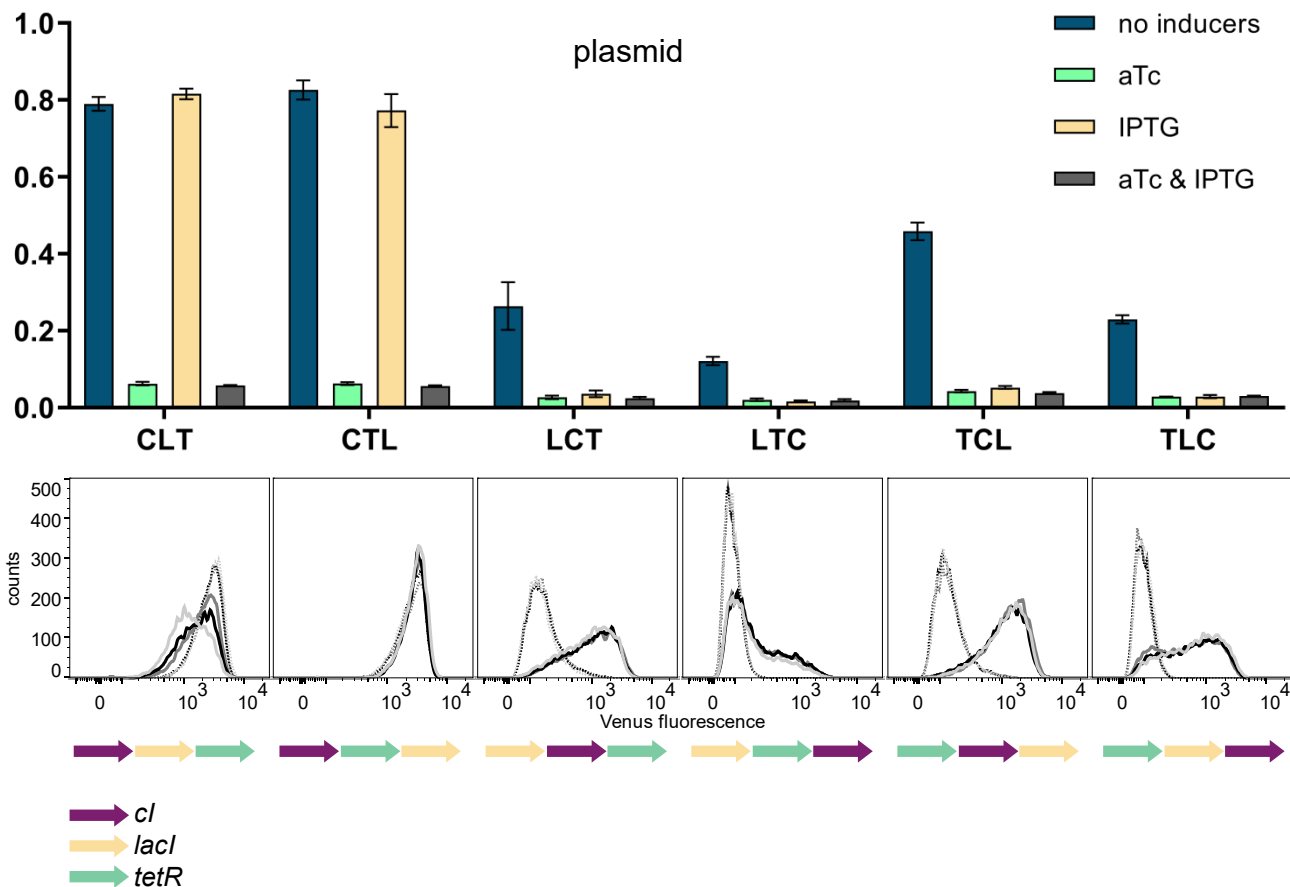

B.

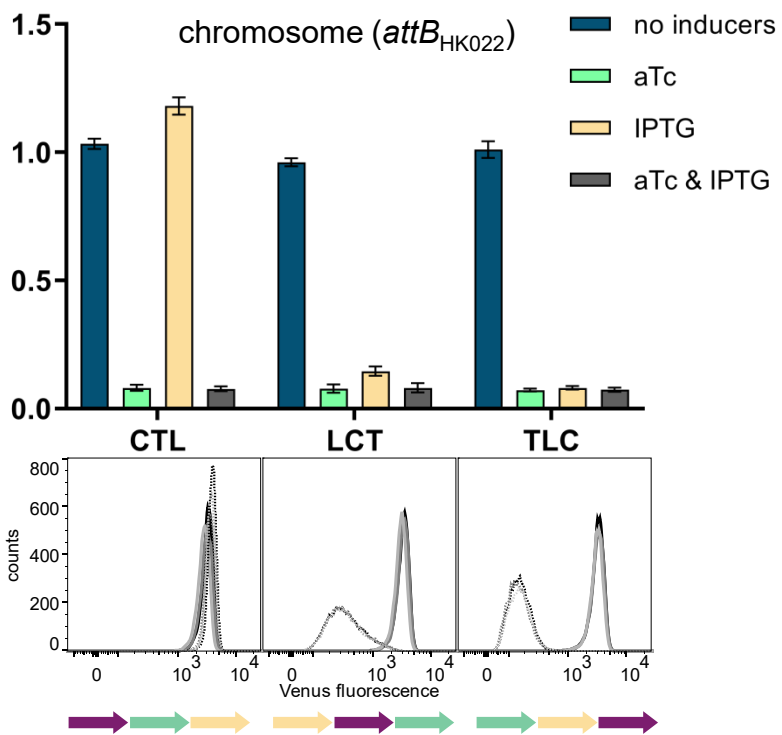

C.

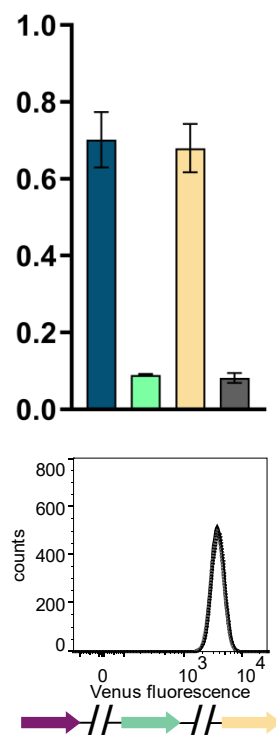

Figure 2

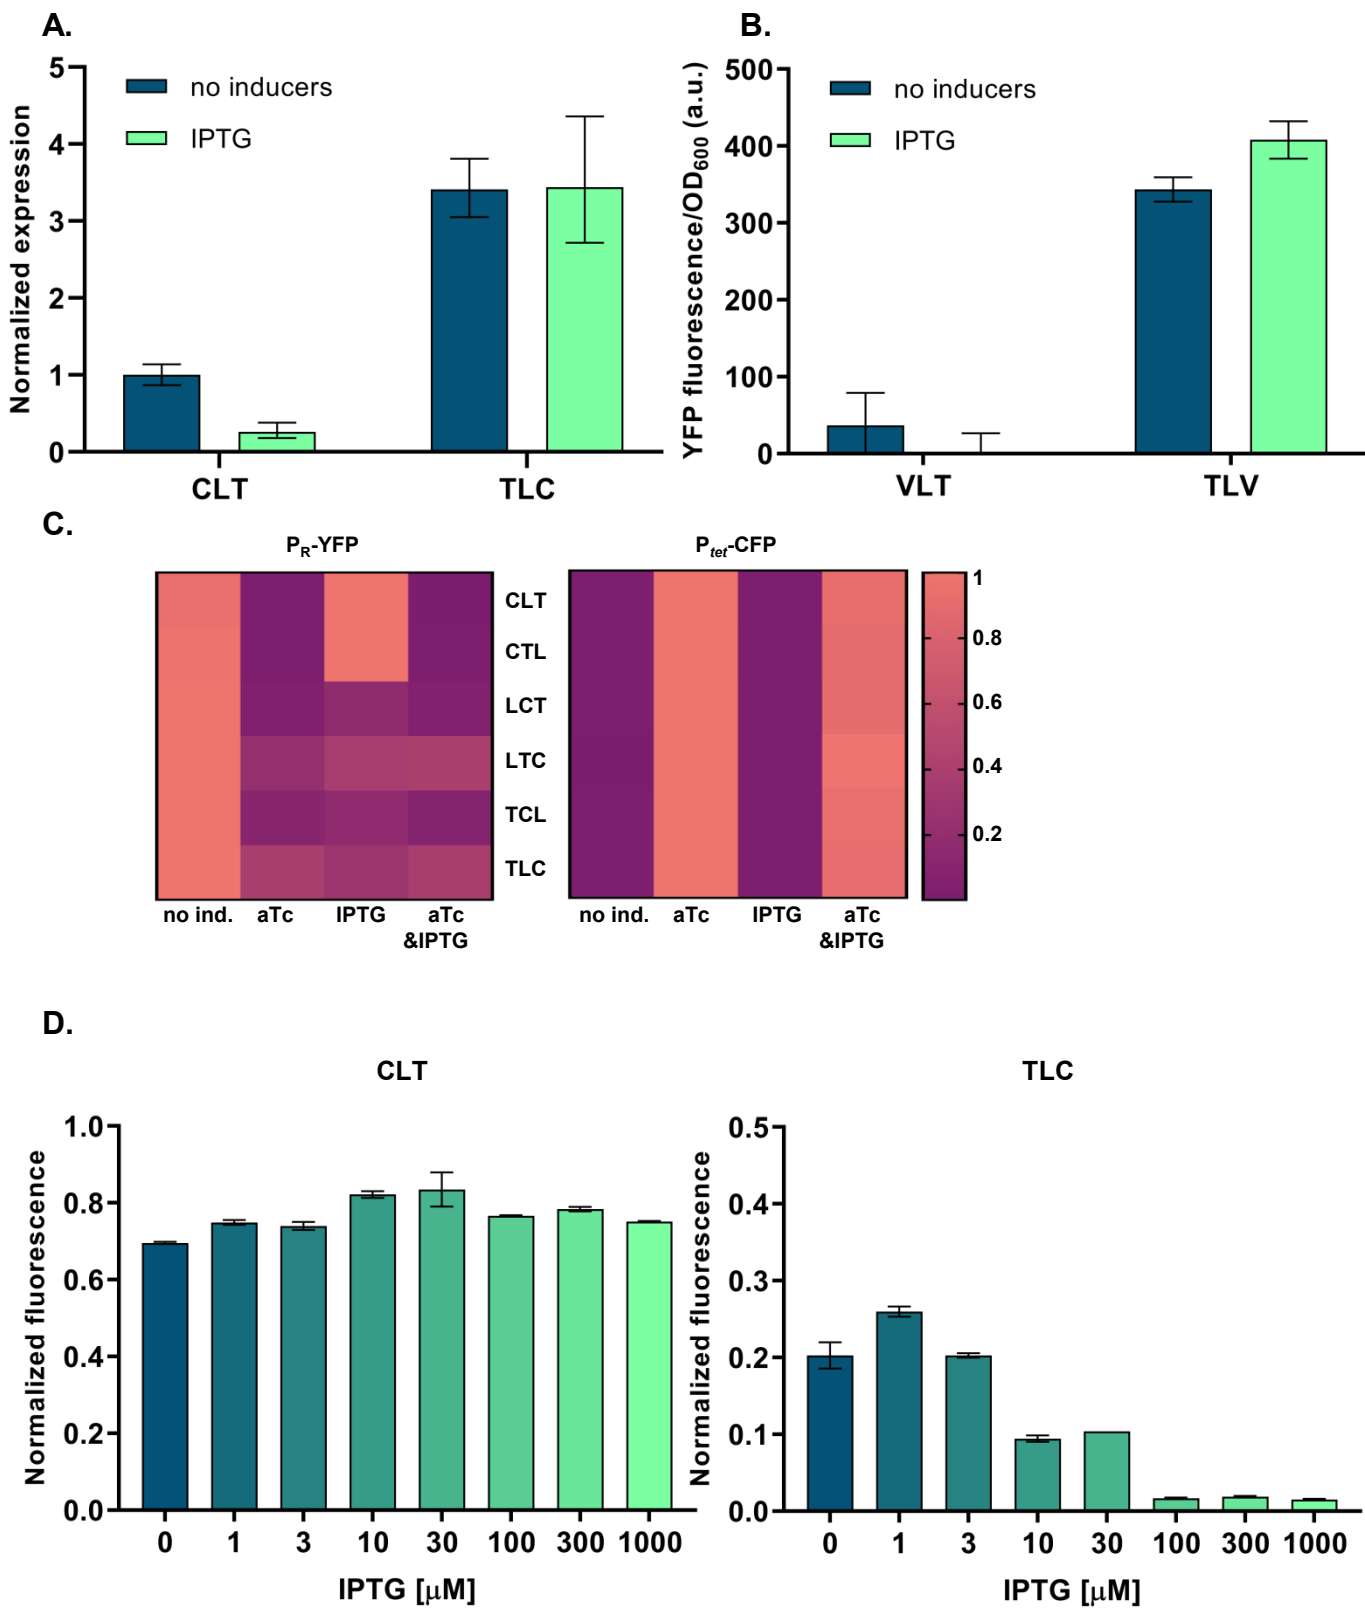

Figure 3

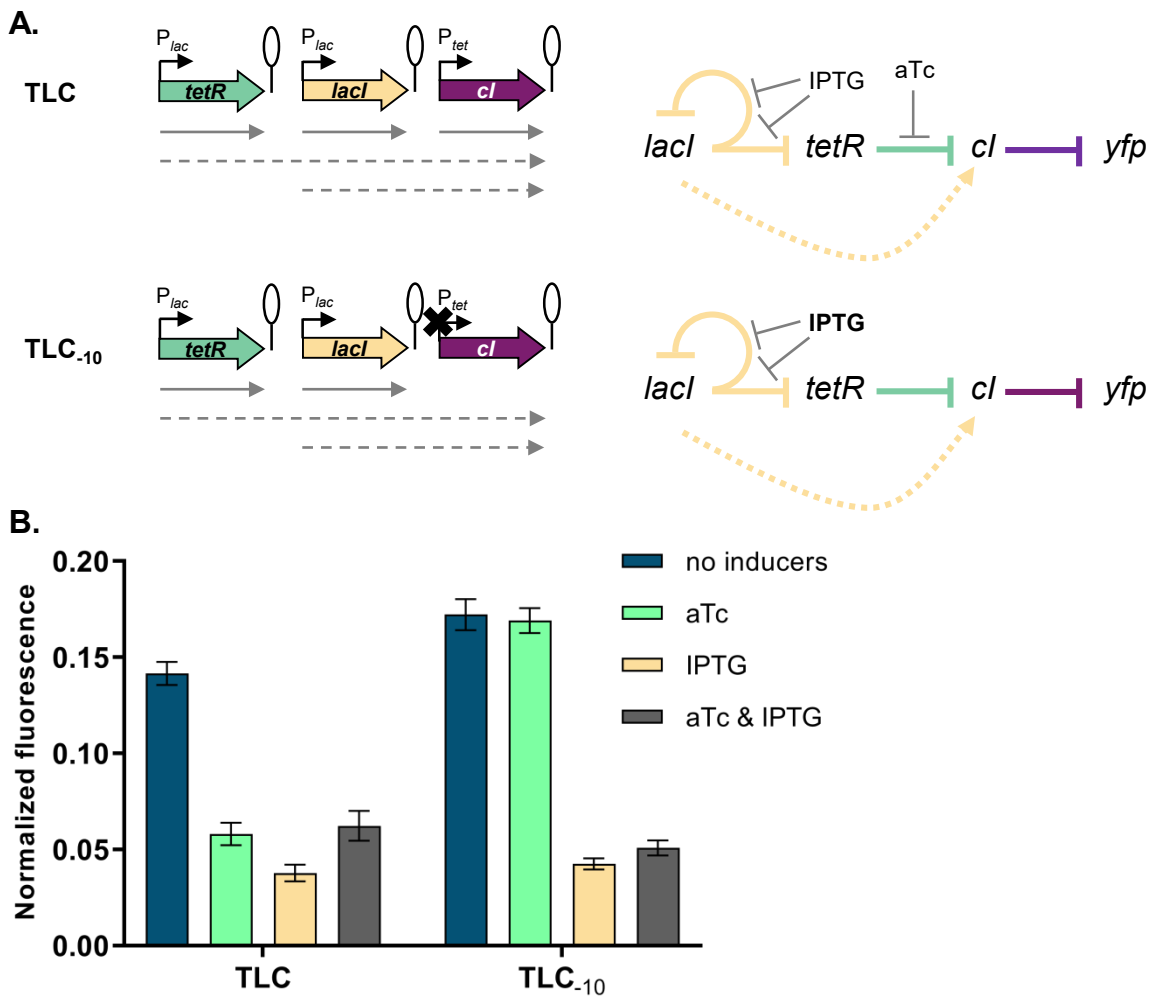

Figure 4

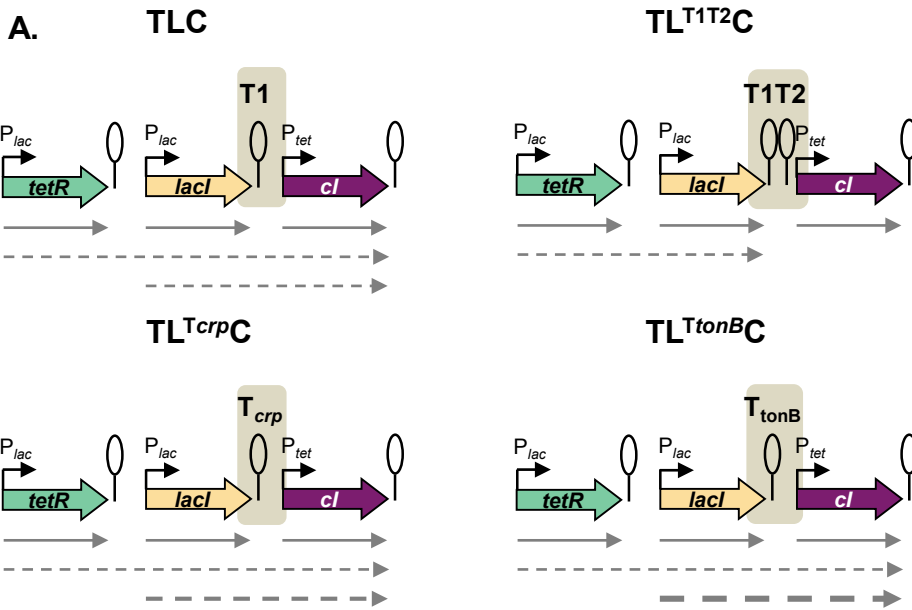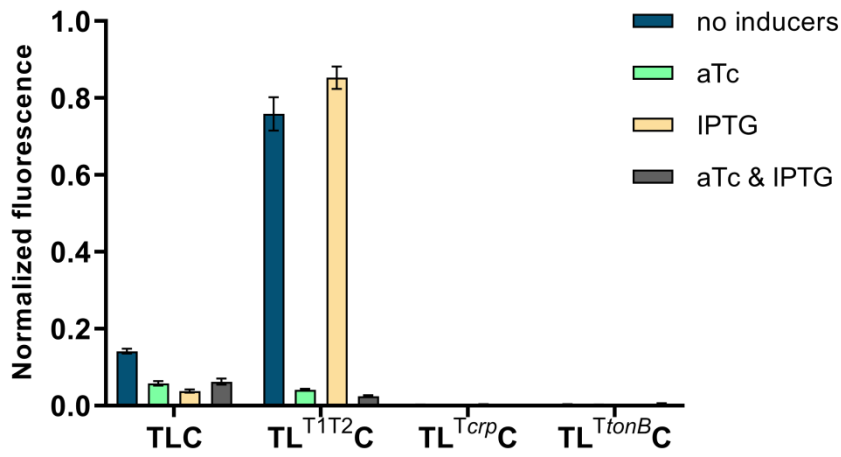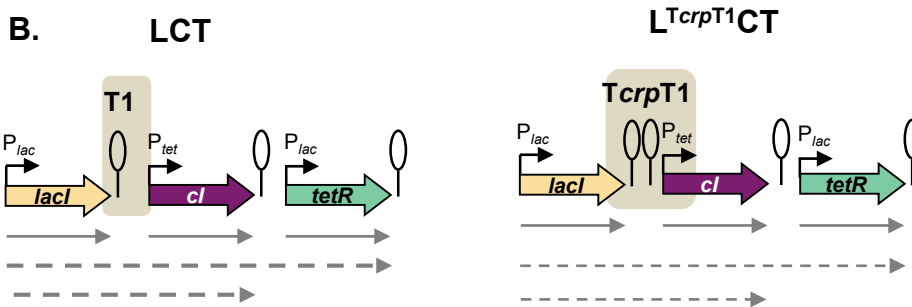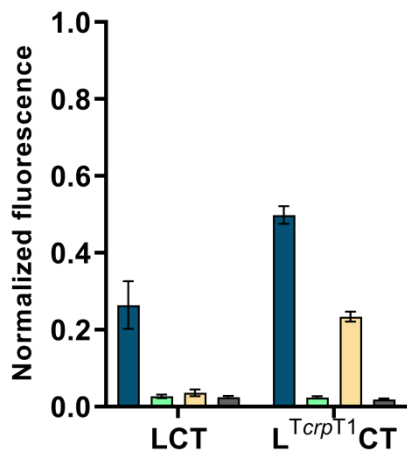

Figure 5

A.

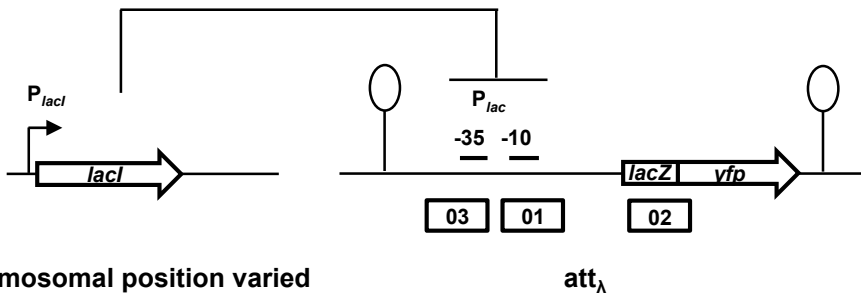

B.

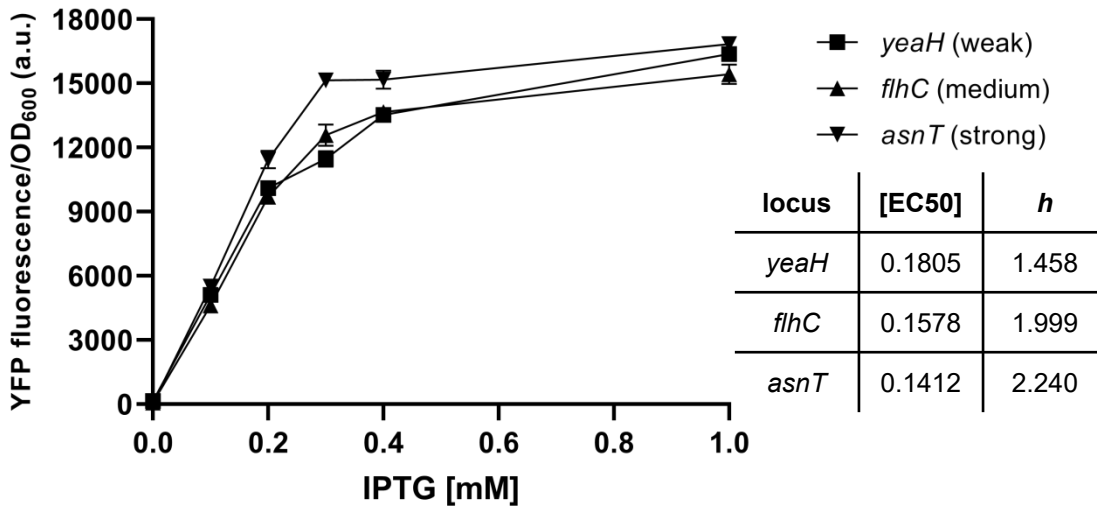

C.

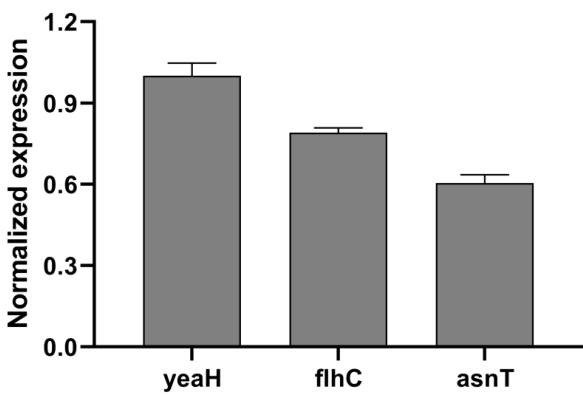

D.

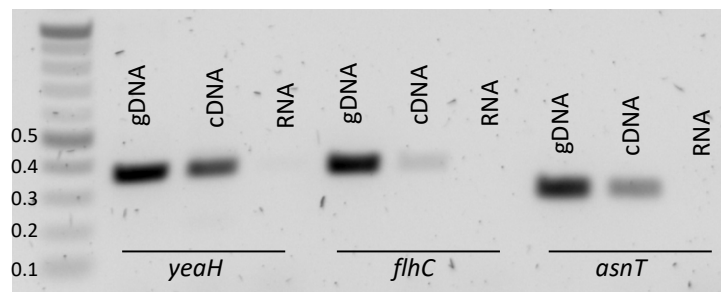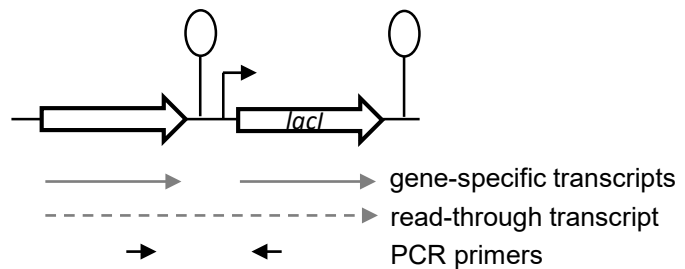

Figure 6

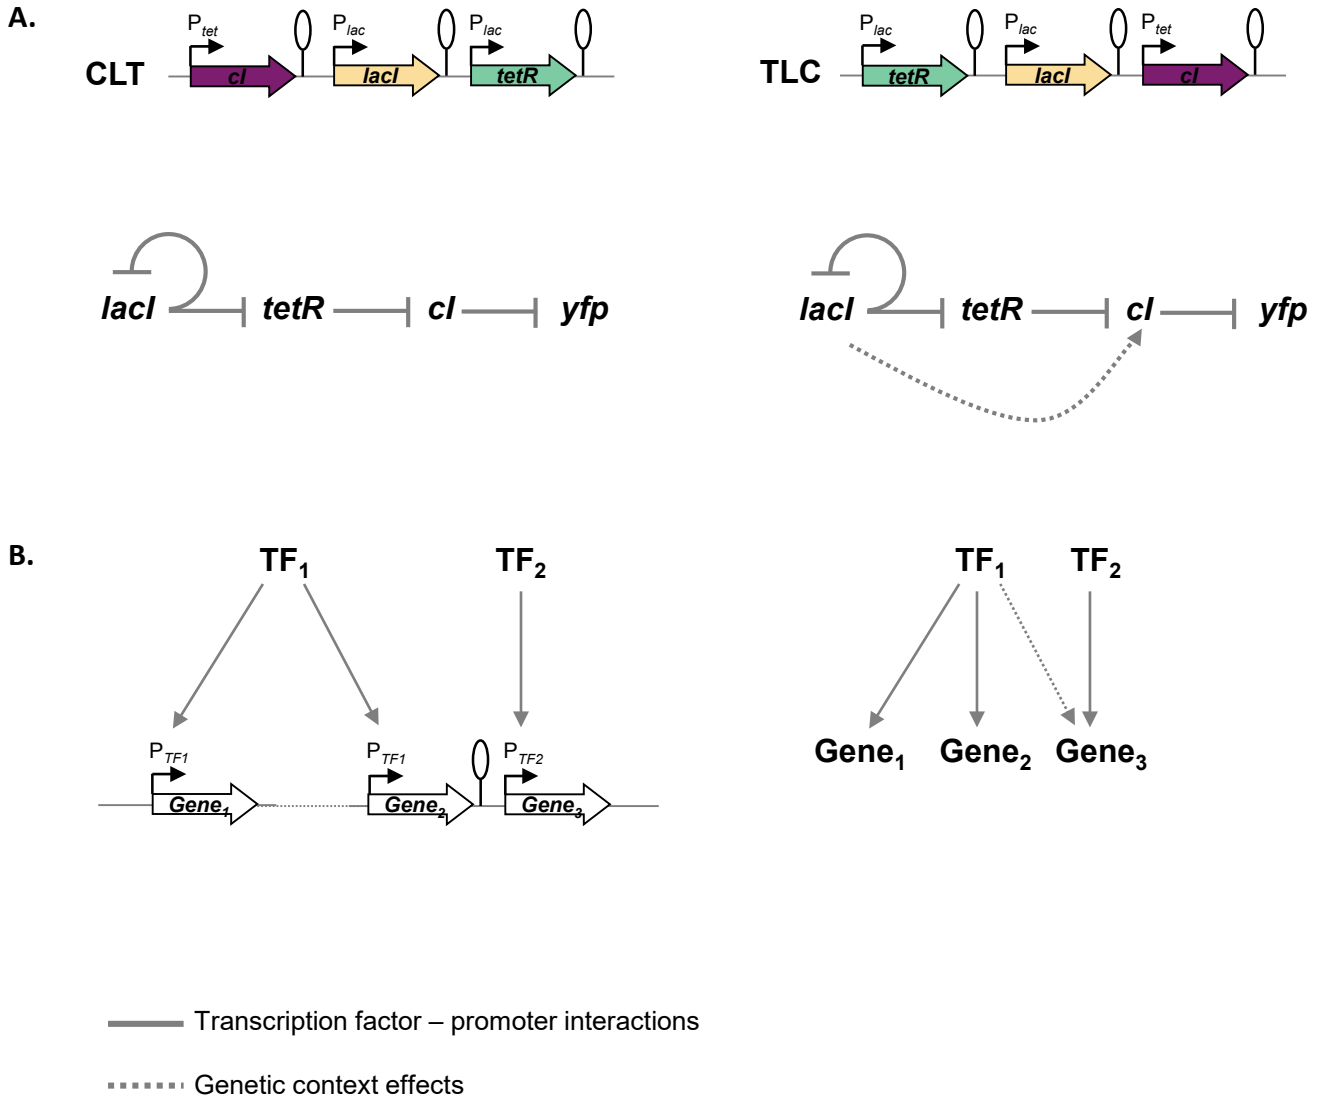

Figure 7

### A. Network interactions

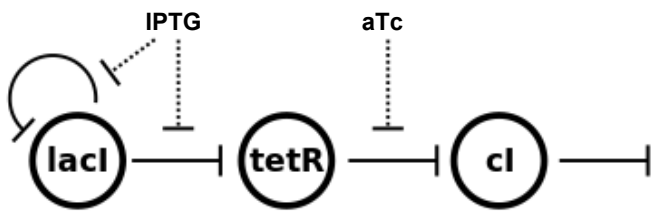

$$\frac{dL}{dt} = \underbrace{k_L - (1 - I_1) \frac{L}{K_L + L}}_{L'} - \delta L + r_x^L$$

$$\frac{dT}{dt} = \underbrace{k_T - (1 - I_1) \frac{T}{K_T + T}}_{T'} - \delta T + r_x^T$$

$$\frac{dC}{dt} = \underbrace{k_C - (1 - I_2) \frac{C}{K_C + C}}_{C'} - \delta C + r_x^C$$

### B. Transcriptional readthrough

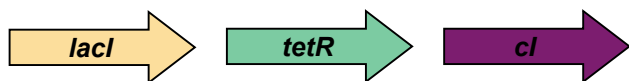

$$r_{\bar{L}\bar{T}\bar{C}}^L = 0$$

$$r_{\bar{L}\bar{T}\bar{C}}^T = \mu L'$$

$$r_{\bar{L}\bar{T}\bar{C}}^C = \mu T'$$

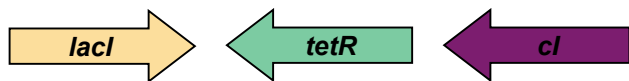

$$r_{\bar{L}\bar{T}\bar{C}}^L = 0$$

$$r_{\bar{L}\bar{T}\bar{C}}^T = \mu C'$$

$$r_{\bar{L}\bar{T}\bar{C}}^C = 0$$

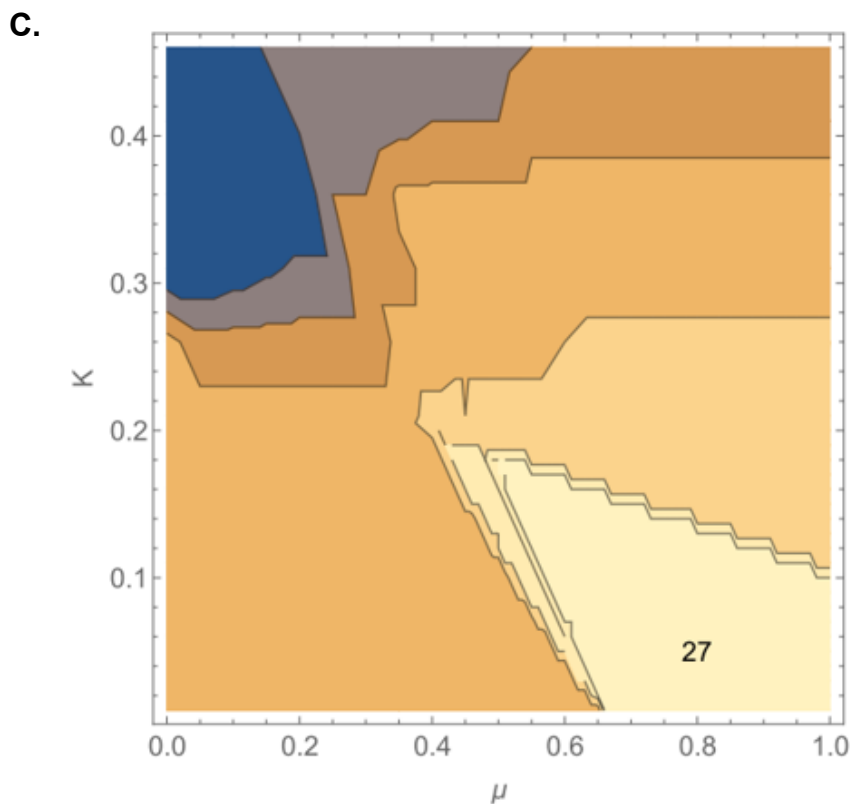

Figure S1



### A. Phenotype independent of plasmid elements and predicted by the model

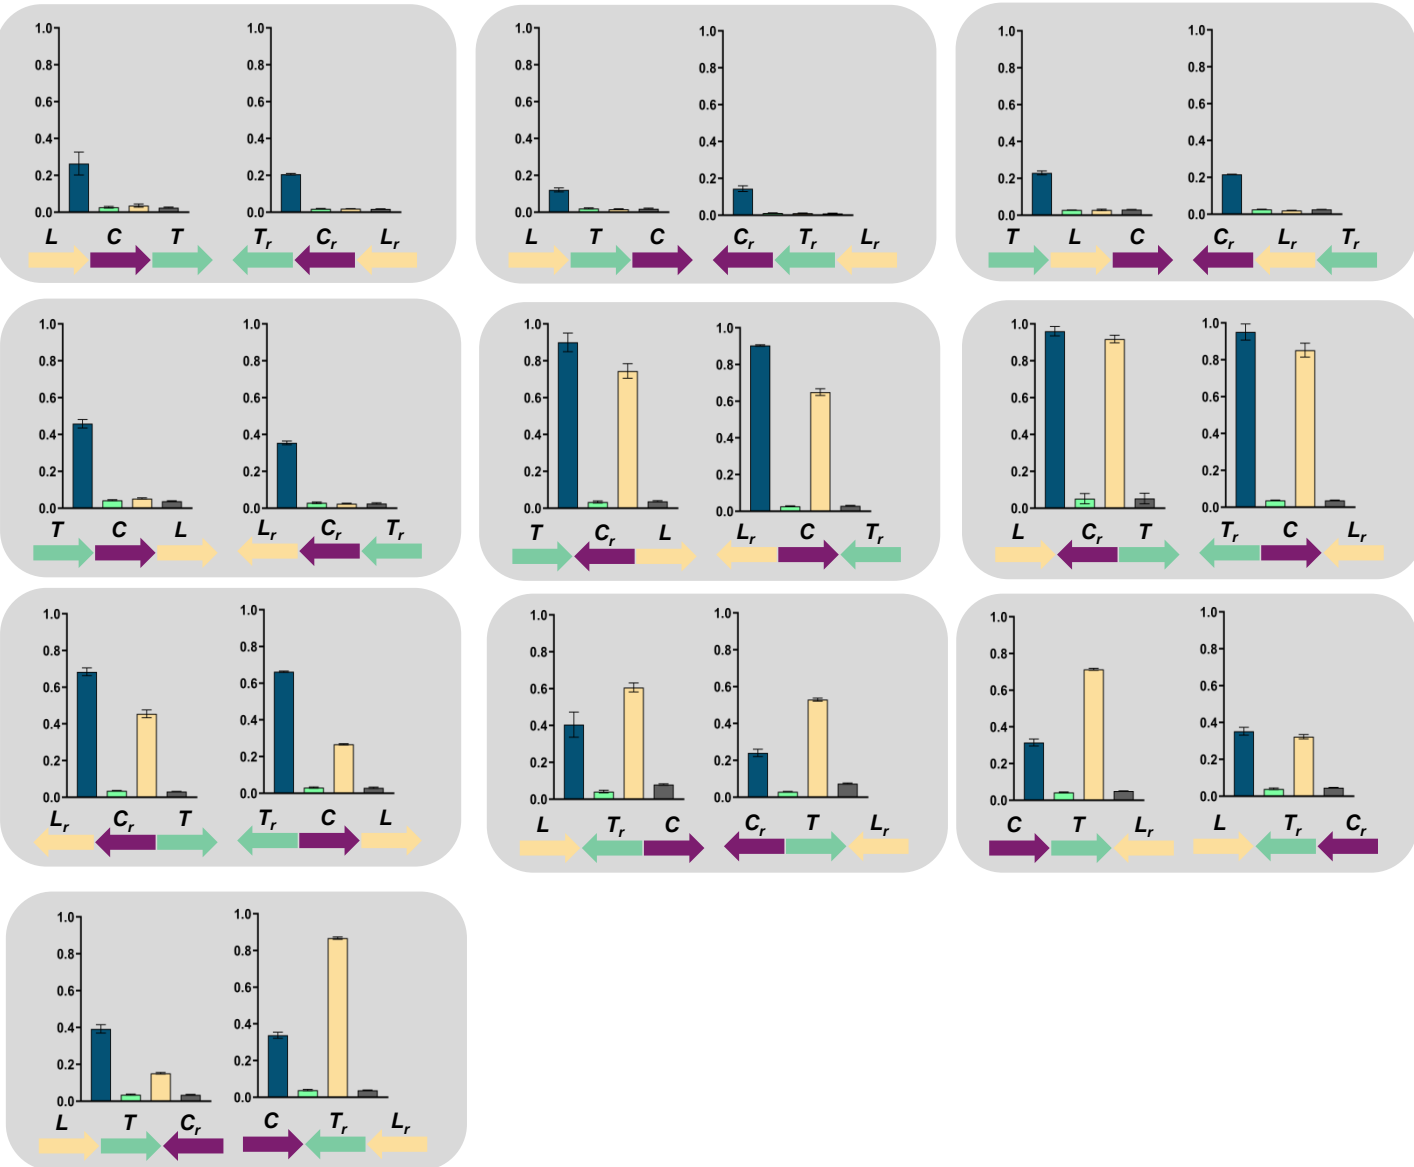

### B. Phenotype independent of plasmid elements and not consistent with model predictions

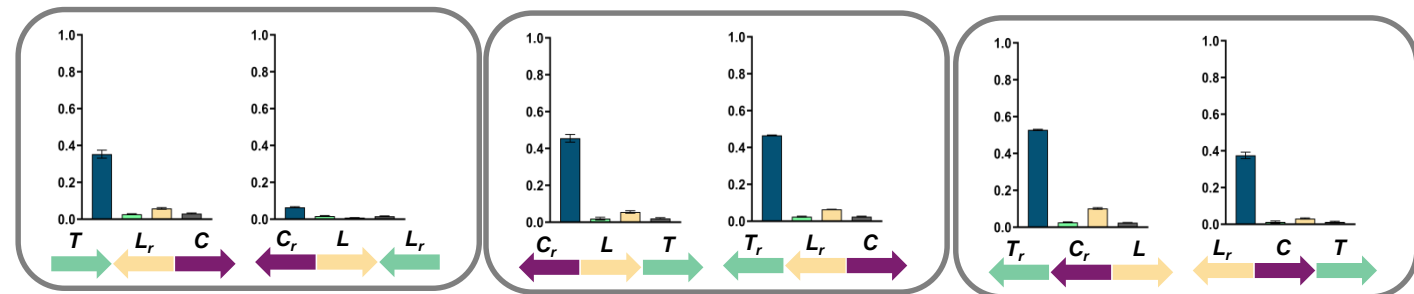

Figure S2

### A. Phenotype influenced by plasmid elements

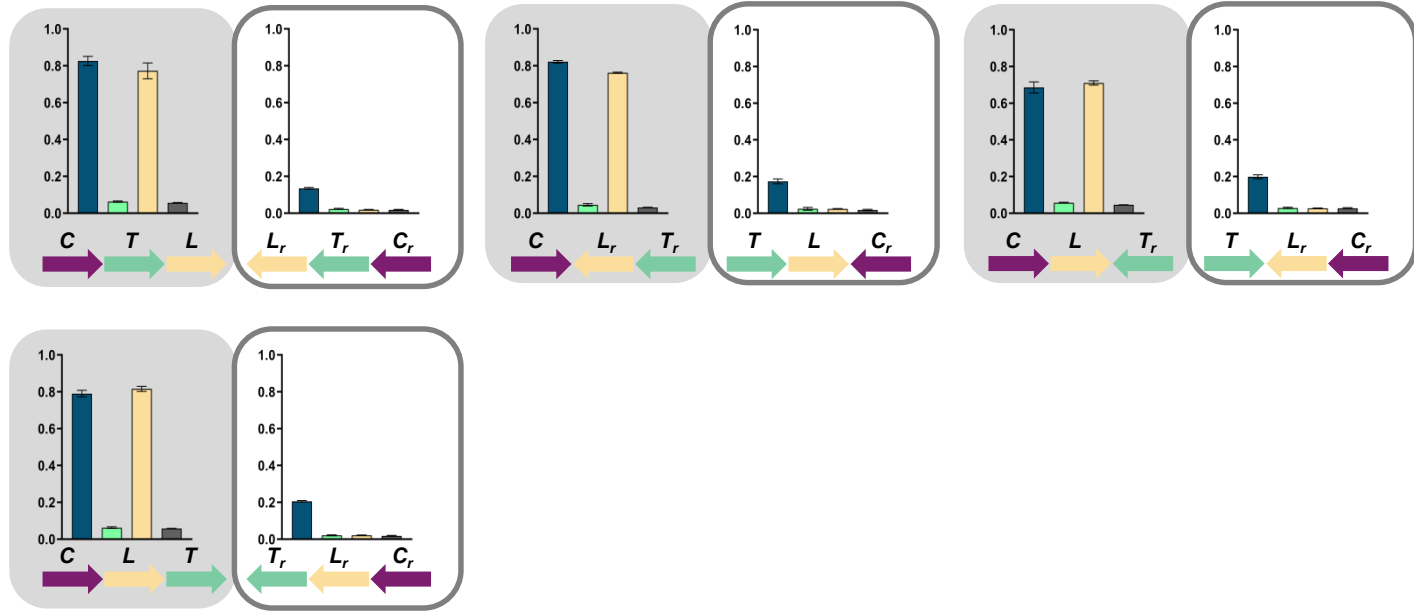

### B. Respective pair not cloned

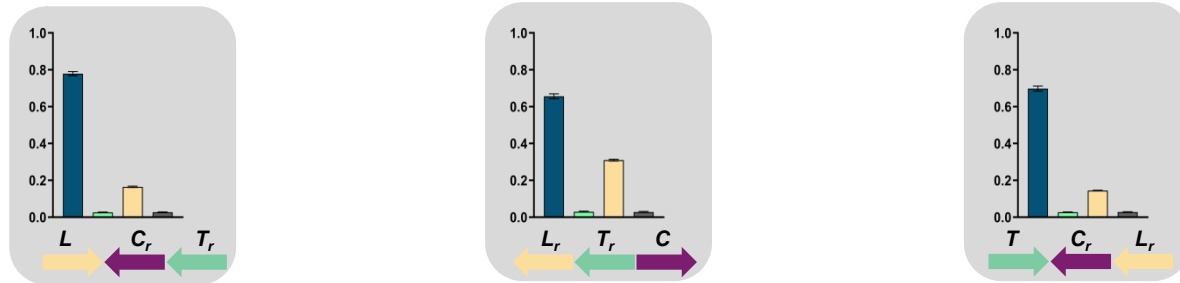

Figure S3

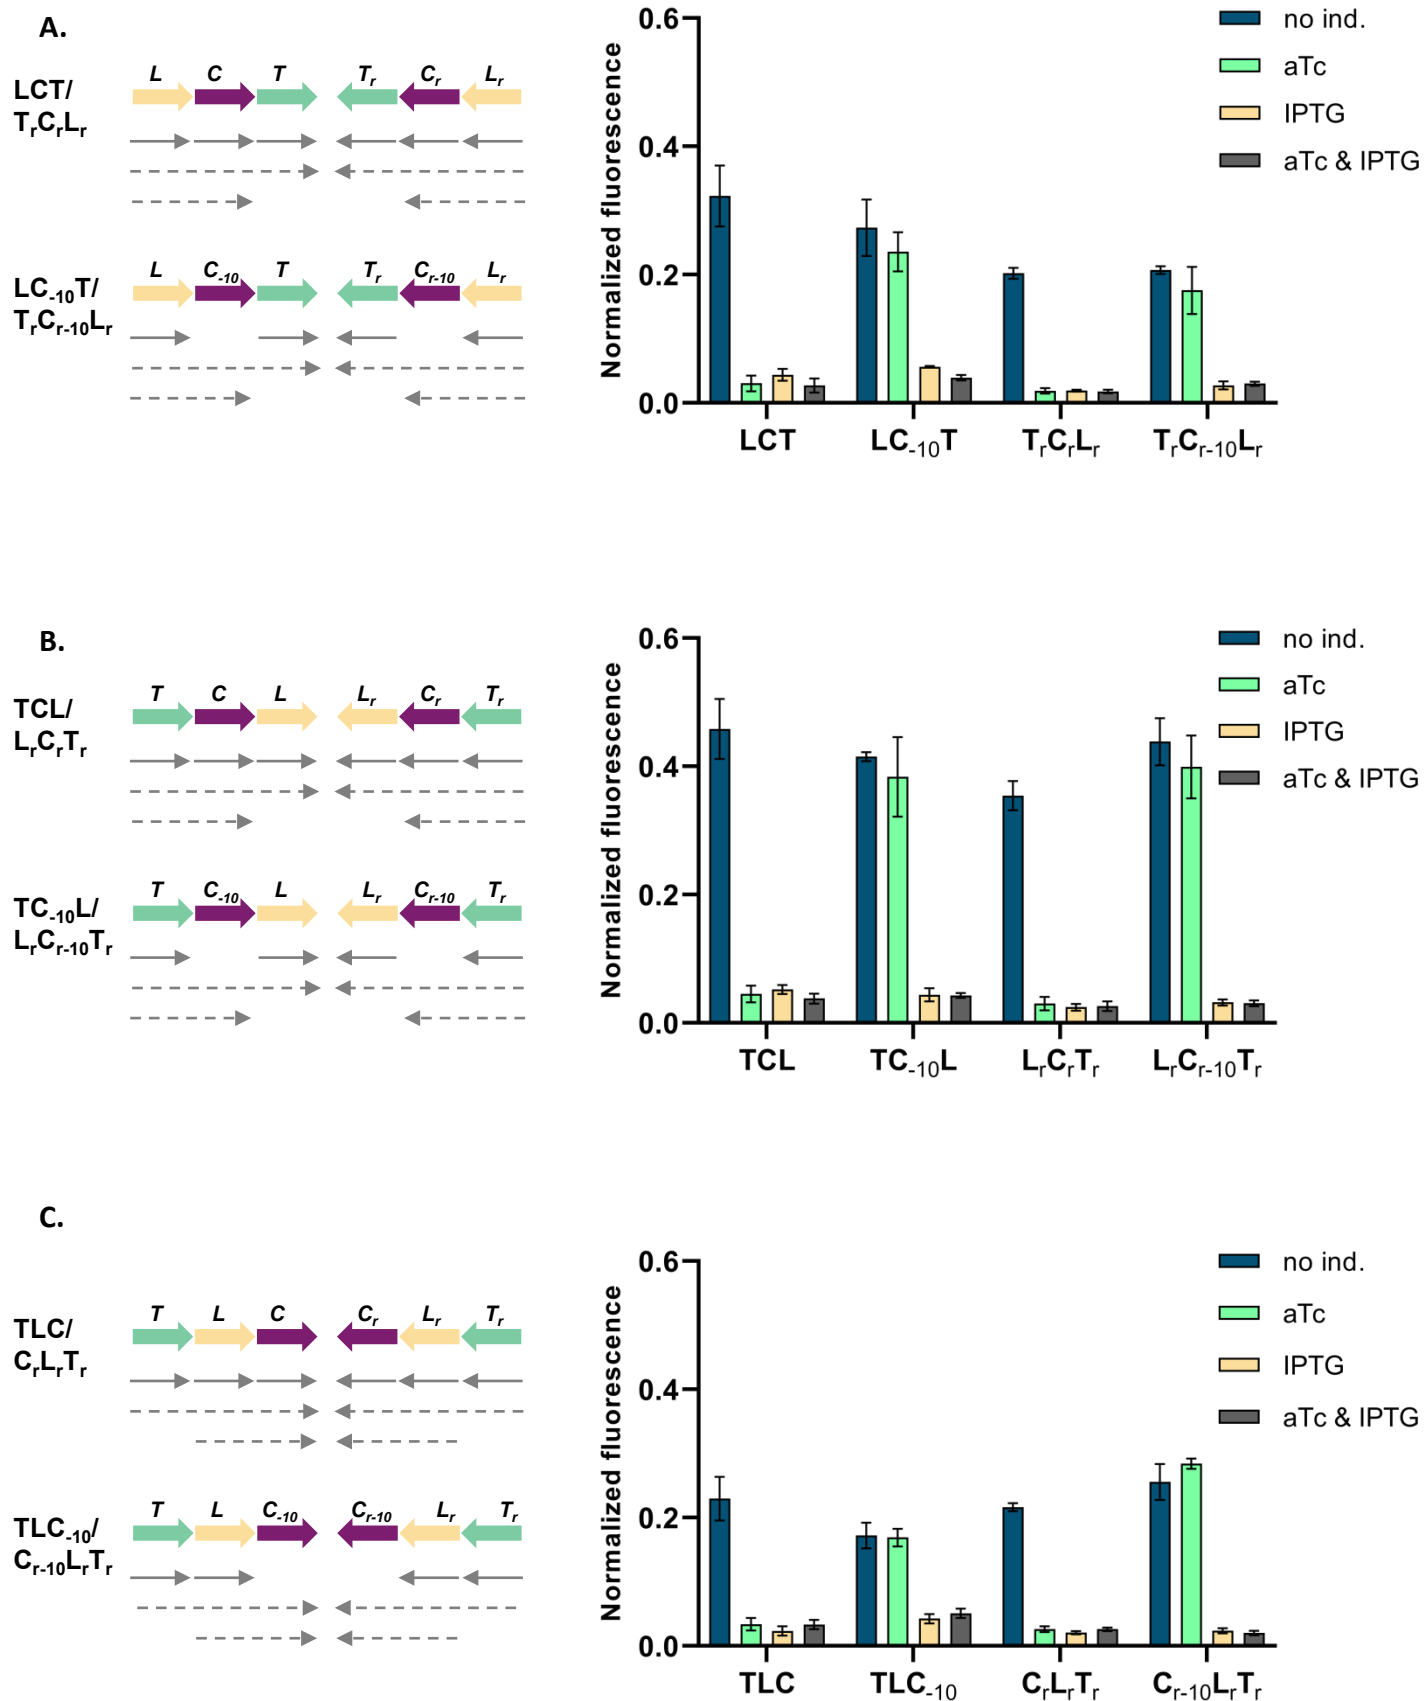

Figure S4

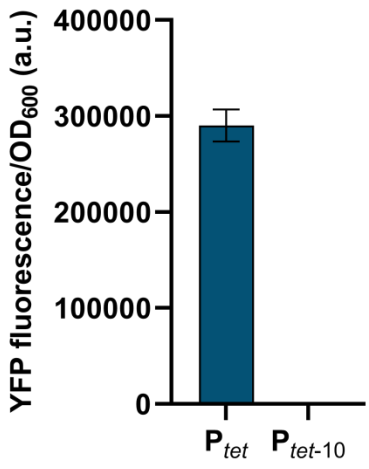

Figure S5

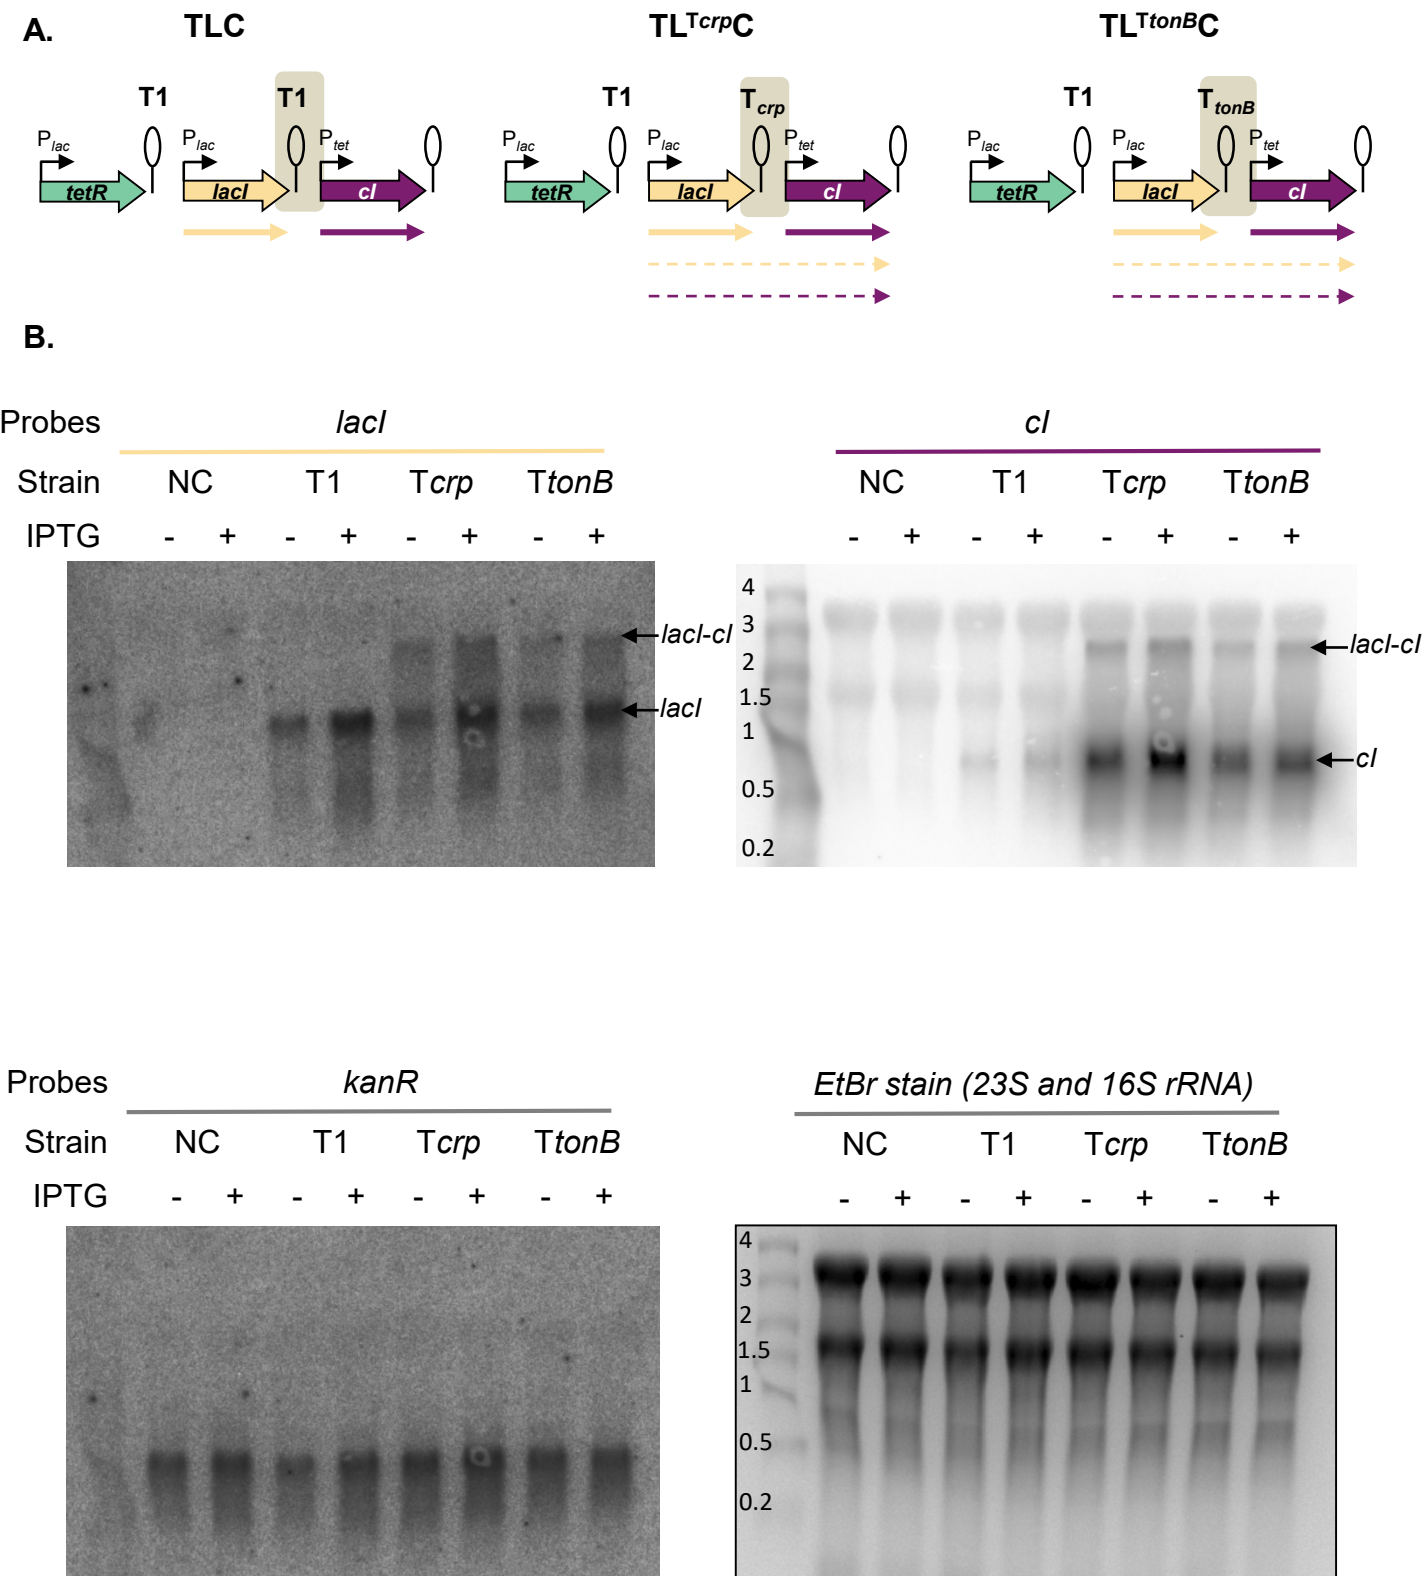

Figure S6

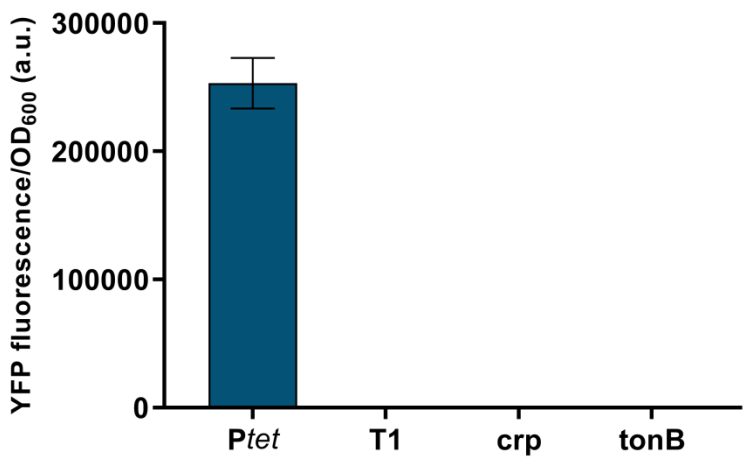

Figure S7

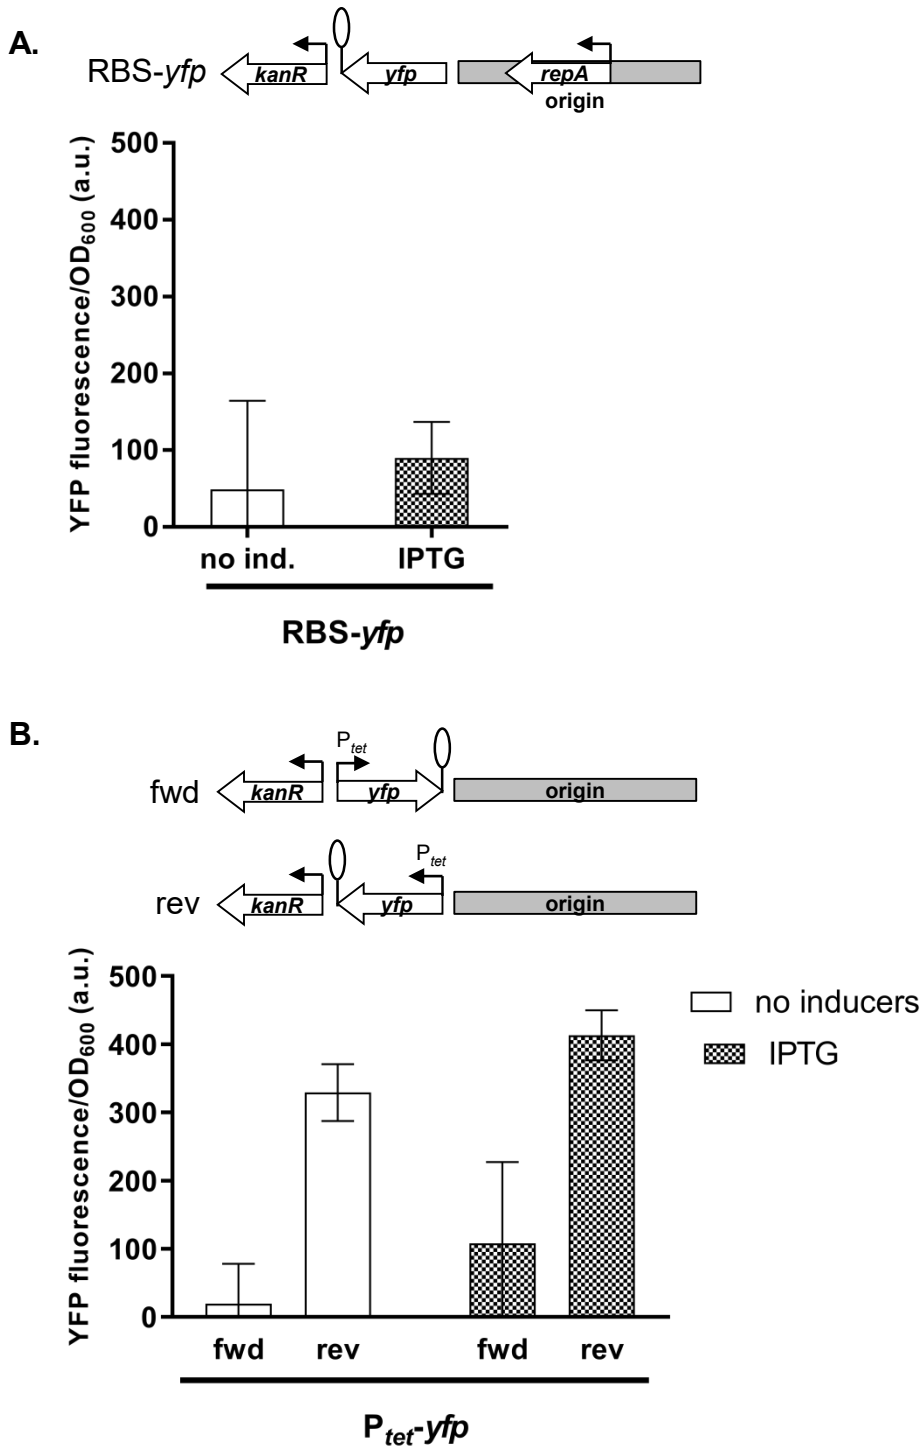

Figure S8

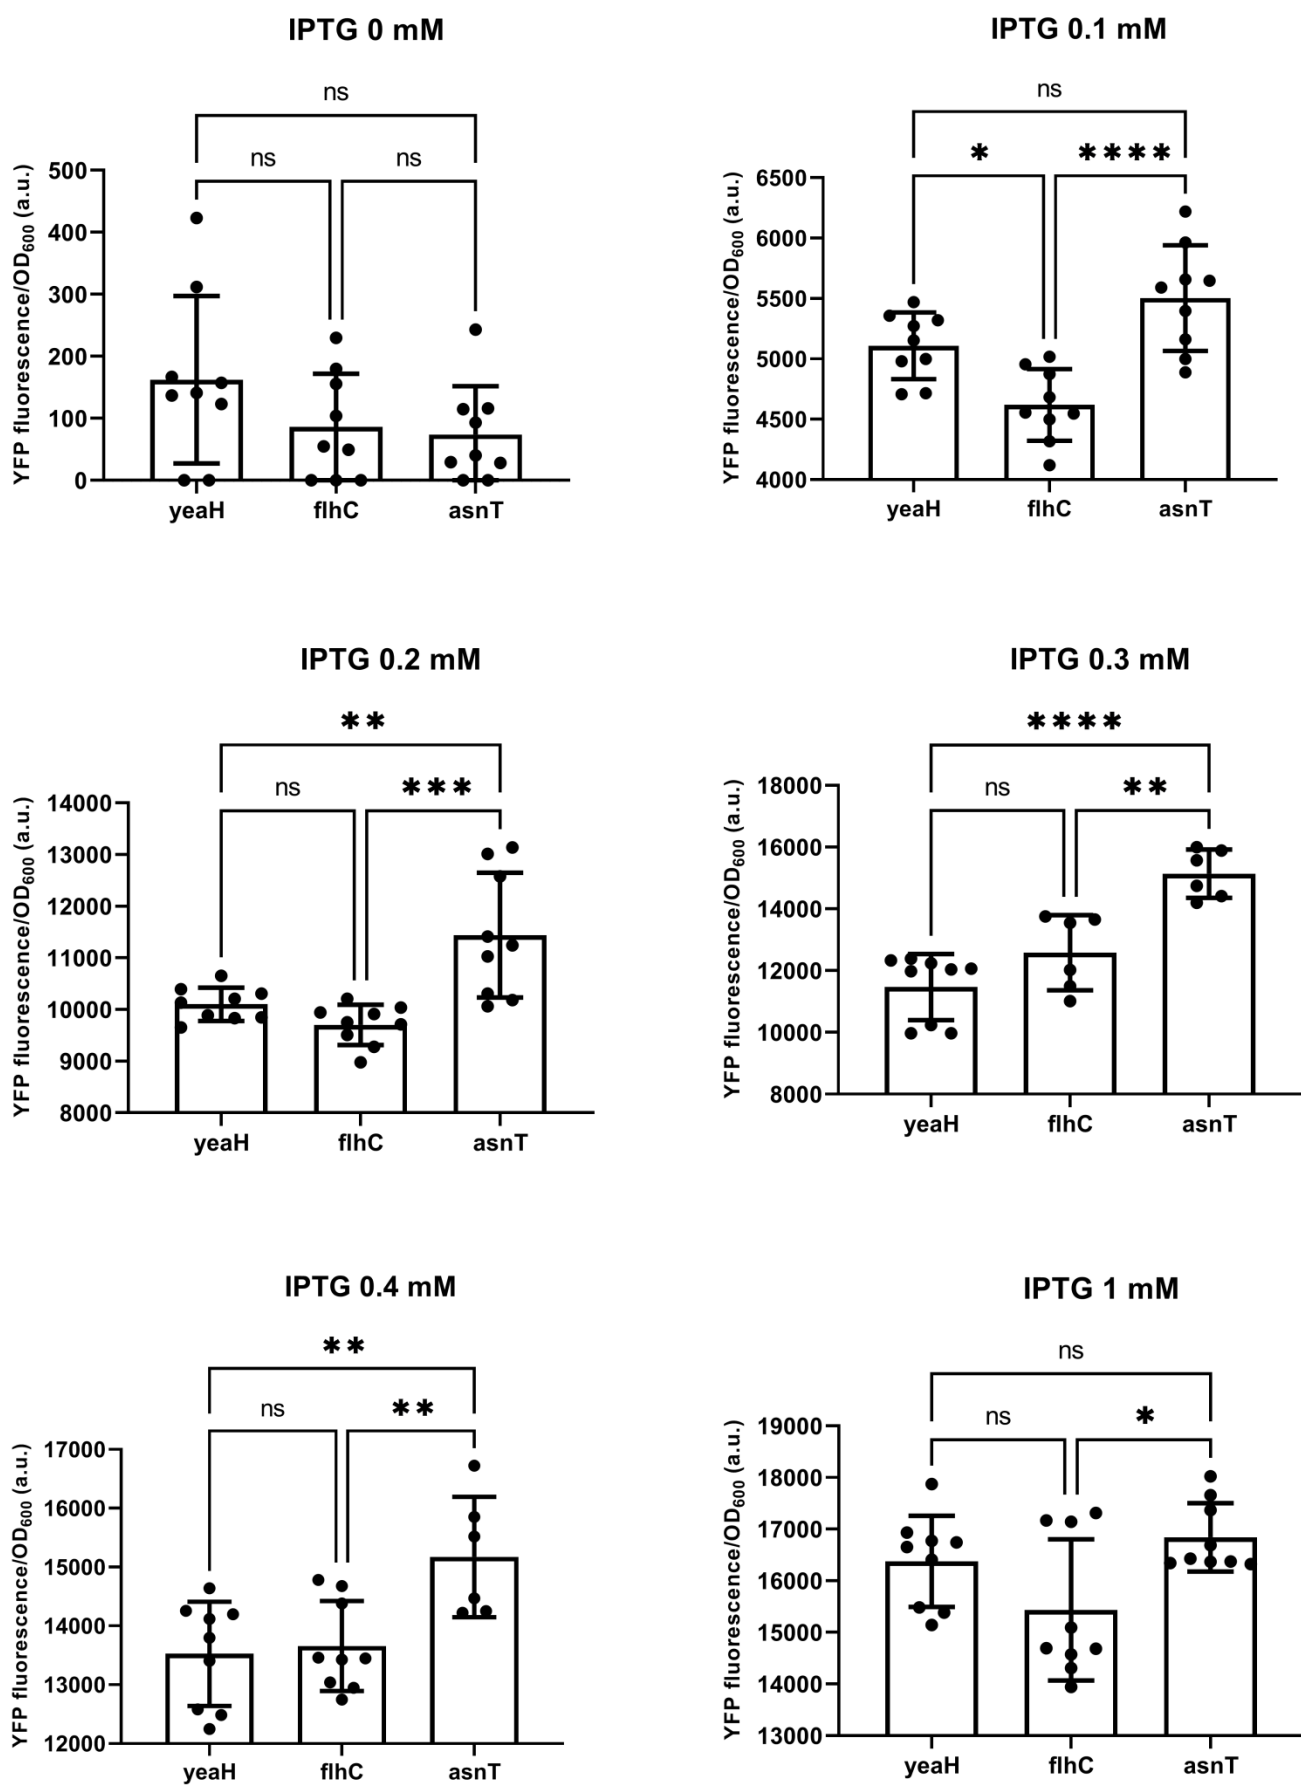

Figure S9



**A.**

| IPTG      | -          | -         | +         | +          |
|-----------|------------|-----------|-----------|------------|
| aTc       | -          | +         | -         | +          |
| NOT (aTc) | On         | Off       | On        | Off        |
| NOR       | On         | Off       | Off       | Off        |
| ANDN      | Off<br>Off | Off<br>On | On<br>Off | Off<br>Off |
| ALL ON    | On         | On        | On        | On         |
| NAND      | On         | On        | On        | Off        |
| ORN       | On<br>On   | On<br>Off | Off<br>On | On<br>On   |

**B.**

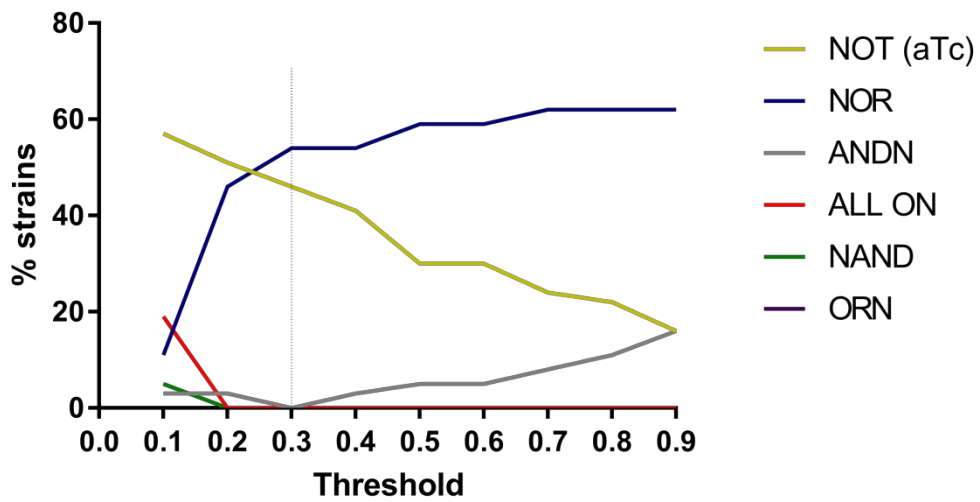

Figure S10
